# Supplementary material for: Docking study and biological evaluation of pyrrolidine-based iminosugars as pharmacological chaperones for Gaucher disease
Source: Royal Society of Chemistry journal article supplement (doi:10.1039/c5ob02223a), 2015-11-27

## Supporting information for

### Docking study and biological evaluation of pyrrolidine-based iminosugars as pharmacological chaperones for Gaucher disease

Atsushi Kato,<sup>\*, a</sup> Izumi Nakagome,<sup>b</sup> Kasumi Sato,<sup>a</sup> Arisa Yamamoto,<sup>a</sup> Isao Adachi,<sup>a</sup> Robert J. Nash,<sup>c</sup> George W. J. Fleet,<sup>d</sup> Yoshihiro Natori,<sup>e</sup> Yasuka Watanabe,<sup>e</sup> Tatsushi Imahori,<sup>e</sup> Yuichi Yoshimura,<sup>e</sup> Hiroki Takahata,<sup>e</sup> Shuichi Hirono<sup>\*, b</sup>

<sup>a</sup> Department of Hospital Pharmacy, University of Toyama, 2630 Sugitani, Toyama 930-0194, Japan

<sup>b</sup> School of Pharmaceutical Sciences, Kitasato University, Tokyo 108-8641, Japan

<sup>c</sup> Institute of Biological, Environmental and Rural Sciences / Phytoquest Limited, Plas Gogerddan, Aberystwyth, Ceredigion, SY23 3EB, United Kingdom

<sup>d</sup> Chemistry Research Laboratory, Department of Chemistry, University of Oxford, Oxford, OX1 3TA, United Kingdom

<sup>e</sup> Faculty of Pharmaceutical Sciences, Tohoku Pharmaceutical University, Sendai 981-8558, Japan

#### Table of Contents:

|                      |    |
|----------------------|----|
| Experimental Section | S2 |
| NMR spectral data    | S7 |

## General experimental:

### Typical Procedure for Negishi Coupling

#### (5*R*,7*aS*)-5-Butyl-1,7*a*-dihydropyrrolo[1,2-*c*]oxazol-3(5*H*)-one (2a)

89% yield;  $[\alpha]_D^{22} = -167.6$  (*c* 0.42, CHCl<sub>3</sub>). *Lit. ent-2a*<sup>2</sup>:  $[\alpha]_D^{24} = +175.4$  (*c* 1.08, CHCl<sub>3</sub>).

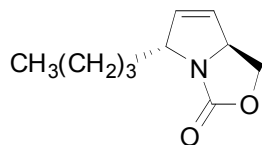

#### (5*R*,7*aS*)-5-Pentyl-1,7*a*-dihydropyrrolo[1,2-*c*]oxazol-3(5*H*)-one (2b)

75 % yield;  $[\alpha]_D^{18} = -140.6$  (*c* 0.49, CHCl<sub>3</sub>). *Lit. ent-2b*<sup>2</sup>:  $[\alpha]_D^{24} = +170.9$  (*c* 1.00, CHCl<sub>3</sub>).

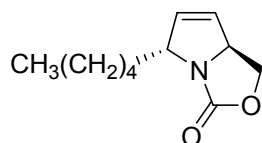

#### (5*R*,7*aS*)-5-Hexyl-1,7*a*-dihydropyrrolo[1,2-*c*]oxazol-3(5*H*)-one (2c)

65% yield;  $[\alpha]_D^{25} = -196.8$  (*c* 0.40, CHCl<sub>3</sub>). *Lit. ent-2c*<sup>2</sup>:  $[\alpha]_D^{24} = +170.9$  (*c* 1.00, CHCl<sub>3</sub>).

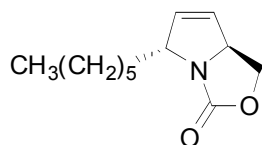

#### (5*R*,7*aS*)-5-Heptyl-1,7*a*-dihydropyrrolo[1,2-*c*]oxazol-3(5*H*)-one (2d)

68 % yield;  $[\alpha]_D^{27} = -151.1$  (*c* 1.09, CHCl<sub>3</sub>). *Lit. ent-2d*<sup>2</sup>:  $[\alpha]_D^{25} = +154.4$  (*c* 1.09, CHCl<sub>3</sub>).

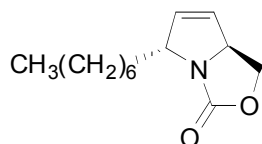

#### (5*R*,7*aS*)-5-Octyl-1,7*a*-dihydropyrrolo[1,2-*c*]oxazol-3(5*H*)-one (2e)

65 % yield;  $[\alpha]_D^{23} = -139.1$  (*c* 1.0, CHCl<sub>3</sub>). *Lit. ent-2e*<sup>2</sup>:  $[\alpha]_D^{25} = +140.1$  (*c* 1.07, CHCl<sub>3</sub>).

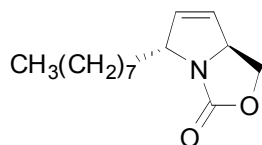

#### (5*R*,7*aS*)-5-Nonyl-1,7*a*-dihydropyrrolo[1,2-*c*]oxazol-3(5*H*)-one (2f)

57 % yield;  $[\alpha]_D^{27} = -126.6$  (*c* 1.16, CHCl<sub>3</sub>). *Lit. ent-2f*<sup>2</sup>:  $[\alpha]_D^{25} = +138.1$  (*c* 1.75, CHCl<sub>3</sub>).

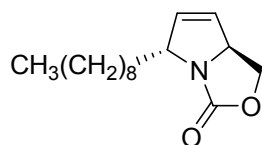

**(5R,7aS)-5-Decyl-1,7a-dihydropyrrolo[1,2-c]oxazol-3(5H)-one (2g)**

65 % yield;  $[\alpha]_D^{27} = -136.0$  (*c* 1.19, CHCl<sub>3</sub>). *Lit. ent-2g*<sup>2</sup>:  $[\alpha]_D^{24} = +123.0$  (*c* 0.97, CHCl<sub>3</sub>).

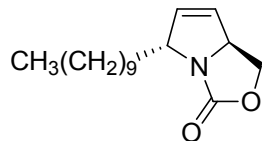

**(5R,7aS)-5-Undecyl-1,7a-dihydropyrrolo[1,2-c]oxazol-3(5H)-one (2h)**

63% yield;  $[\alpha]_D^{25} = -111.1$  (*c* 0.40, CHCl<sub>3</sub>). *Lit. ent-2h*<sup>2</sup>:  $[\alpha]_D^{25} = +115.6$  (*c* 0.74, CHCl<sub>3</sub>).

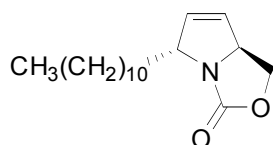

**Typical procedure for epoxidation**

**(1aS,1bR,6R,6aR)-6-Butyltetrahydrooxireno[2',3':3,4]pyrrolo[1,2-c]oxazol-4(1aH)-one (3a)**

92% yield;  $[\alpha]_D^{29} = -40.8$  (*c* 0.95, CHCl<sub>3</sub>). *Lit. ent-3a*<sup>2</sup>:  $[\alpha]_D^{22} = +48.2$  (*c* 0.12, CHCl<sub>3</sub>).

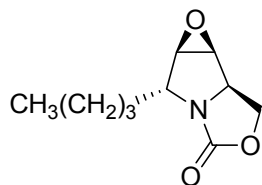

**(1aS,1bR,6R,6aR)-6-Pentyltetrahydrooxireno[2',3':3,4]pyrrolo[1,2-c]oxazol-4(1aH)-one (3b)**

90% yield;  $[\alpha]_D^{23} = -55.0$  (*c* 0.34, CHCl<sub>3</sub>). *Lit. ent-3b*<sup>2</sup>:  $[\alpha]_D^{24} = +40.4$  (*c* 1.18, CHCl<sub>3</sub>).

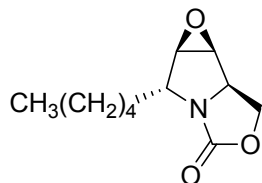

**(1aS,1bR,6R,6aR)-6-Hexyltetrahydrooxireno[2',3':3,4]pyrrolo[1,2-c]oxazol-4(1aH)-one (3c)**

99% yield;  $[\alpha]_D^{22} = -58.8$  (*c* 0.18, CHCl<sub>3</sub>). *Lit. ent-3c*<sup>2</sup>:  $[\alpha]_D^{22} = +37.1$  (*c* 0.15, CHCl<sub>3</sub>).

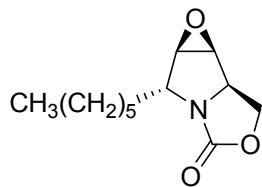

**(1aS,1bR,6R,6aR)-6-Heptyltetrahydrooxireno[2',3':3,4]pyrrolo[1,2-c]oxazol-4(1aH)-one (3d)**

99 % yield;  $[\alpha]_D^{26} = -38.4$  (*c* 1.12, CHCl<sub>3</sub>). *Lit. ent-3d*<sup>2</sup>:  $[\alpha]_D^{22} = +42.2$  (*c* 0.16, CHCl<sub>3</sub>).

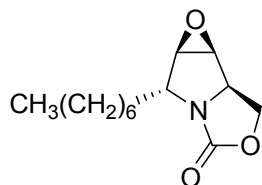

**(1aS,1bR,6R,6aR)-6-Octyltetrahydrooxireno[2',3':3,4]pyrrolo[1,2-c]oxazol-4(1aH)-one (3e)**

85 % yield;  $[\alpha]_D^{19} = -43.4$  (*c* 0.41, CHCl<sub>3</sub>). *Lit. ent-3e*<sup>2</sup>:  $[\alpha]_D^{22} = +41.9$  (*c* 0.98, CHCl<sub>3</sub>).

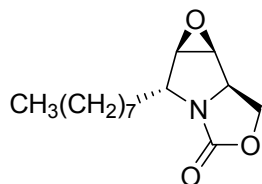

**(1aS,1bR,6R,6aR)-6-Nonyltetrahydrooxireno[2',3':3,4]pyrrolo[1,2-c]oxazol-4(1aH)-one (3f)**

89 % yield;  $[\alpha]_D^{27} = -34.3$  (*c* 1.14, CHCl<sub>3</sub>). *Lit. ent-3f*<sup>2</sup>:  $[\alpha]_D^{25} = +34.0$  (*c* 1.06, CHCl<sub>3</sub>).

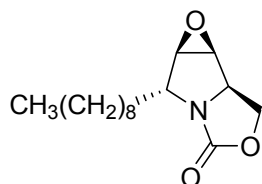

**(1aS,1bR,6R,6aR)-6-Decyltetrahydrooxireno[2',3':3,4]pyrrolo[1,2-c]oxazol-4(1aH)-one (3g)**

86 % yield;  $[\alpha]_D^{27} = -30.7$  (*c* 1.10, CHCl<sub>3</sub>). *Lit. ent-3g*<sup>2</sup>:  $[\alpha]_D^{22} = +27.8$  (*c* 0.48, CHCl<sub>3</sub>).

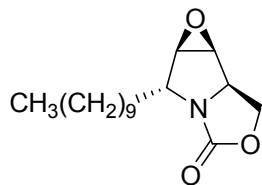

**(1aS,1bR,6R,6aR)-6-Undcyltetrahydrooxireno[2',3':3,4]pyrrolo[1,2-c]oxazol-4(1aH)-one (3h)**

86% yield;  $[\alpha]_D^{25} = -32.5$  ( $c$  0.66,  $\text{CHCl}_3$ ). *Lit. ent-3h<sup>2</sup>* :  $[\alpha]_D^{25} = +31.1$  ( $c$  1.09,  $\text{CHCl}_3$ ).

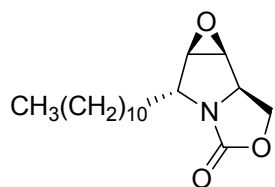

**Typical Procedure for the preparation of a diol.**

**(5*R*,6*R*,7*R*,7*aR*)-6,7-Dihydroxy-5-Butyltetrahydropyrrolo[1,2-c]oxazol-3(1H)-one (4a)**

52 % yield;  $[\alpha]_D^{29} = -23.7$  ( $c$  0.9,  $\text{CHCl}_3$ ). *Lit. ent-4a<sup>2</sup>* :  $[\alpha]_D^{23} = +22.2$  ( $c$  0.46,  $\text{CHCl}_3$ ).

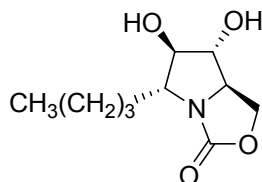

**(5*R*,6*R*,7*R*,7*aR*)-6,7-Dihydroxy-5-Pentyltetrahydropyrrolo[1,2-c]oxazol-3(1H)-one (4b)**

96 % yield,  $[\alpha]_D^{27} = -17.7$  ( $c$  0.78  $\text{CHCl}_3$ ). *Lit. ent-4b<sup>2</sup>* :  $[\alpha]_D^{20} = +20.4$  ( $c$  0.25,  $\text{CHCl}_3$ ).

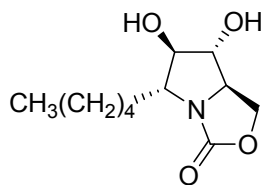

**(5*R*,6*R*,7*R*,7*aR*)-6,7-Dihydroxy-5-Hexyltetrahydropyrrolo[1,2-c]oxazol-3(1H)-one (4c)**

85 % yield,  $[\alpha]_D^{26} = -14.7$  ( $c$  1.04,  $\text{CHCl}_3$ ). *Lit. ent-4c<sup>2</sup>* :  $[\alpha]_D^{24} = +11.6$  ( $c$  1.07,  $\text{CHCl}_3$ ).

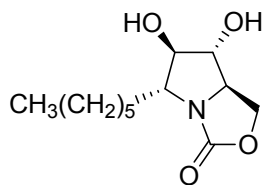

**(5*R*,6*R*,7*R*,7*aR*)-6,7-Dihydroxy-5-Heptyltetrahydropyrrolo[1,2-c]oxazol-3(1H)-one (4d)**

69 % yield,  $[\alpha]_D^{27} = -14.6$  ( $c$  1.23,  $\text{CHCl}_3$ ). *Lit. ent-4d<sup>2</sup>* :  $[\alpha]_D^{20} = +11.0$  ( $c$  0.67,  $\text{CHCl}_3$ ).

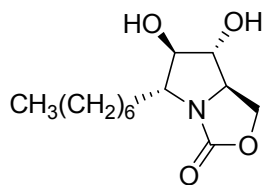

**(5*R*,6*R*,7*R*,7*aR*)-6,7-Dihydroxy-5-Octyltetrahydropyrrolo[1,2-c]oxazol-3(1H)-one (4e)**

94 % yield,  $[\alpha]_D^{25} = -18.4$  ( $c$  0.30,  $\text{CHCl}_3$ ). *Lit. ent-4e<sup>2</sup>* :  $[\alpha]_D^{22} = +15.3$  ( $c$  0.80,  $\text{CHCl}_3$ ).

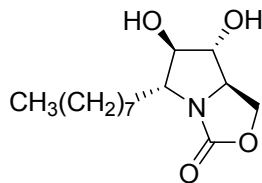

**(5R,6R,7R,7aR)-6,7-Dihydroxy-5-Nonyltetrahydropyrrolo[1,2-c]oxazol-3(1H)-one (4f)**

75 % yield,  $[\alpha]_D^{28} = -15.5$  (*c* 1.10, CHCl<sub>3</sub>). *Lit. ent-4f*<sup>2)</sup> :  $[\alpha]_D^{24} = +17.6$  (*c* 1.09, CHCl<sub>3</sub>).

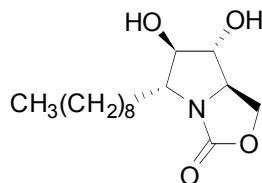

**(5R,6R,7R,7aR)-6,7-Dihydroxy-5-Decyltetrahydropyrrolo[1,2-c]oxazol-3(1H)-one (4g)**

65 % yield,  $[\alpha]_D^{27} = -9.0$  (*c* 0.69, CHCl<sub>3</sub>). *Lit. ent-4g*<sup>2)</sup> :  $[\alpha]_D^{22} = +15.5$  (*c* 0.57, CHCl<sub>3</sub>).

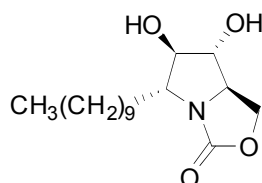

**(5R,6R,7R,7aR)-6,7-Dihydroxy-5-Undecyltetrahydropyrrolo[1,2-c]oxazol-3(1H)-one (4h)**

60% yield,  $[\alpha]_D^{26} = -13.4$  (*c* 1.05, CHCl<sub>3</sub>). *Lit. ent-4h*<sup>2)</sup> :  $[\alpha]_D^{24} = +12.9$  (*c* 1.02, CHCl<sub>3</sub>).

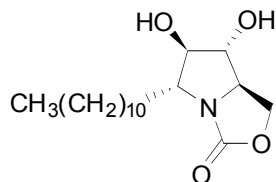

References

- 1) *Bioorg. Med. Chem. Lett.* **2011**, *21*, 738-741.
- 2) *J. Med. Chem.* **2012**, *55*, 10347-10362.

2i (1H-NMR)

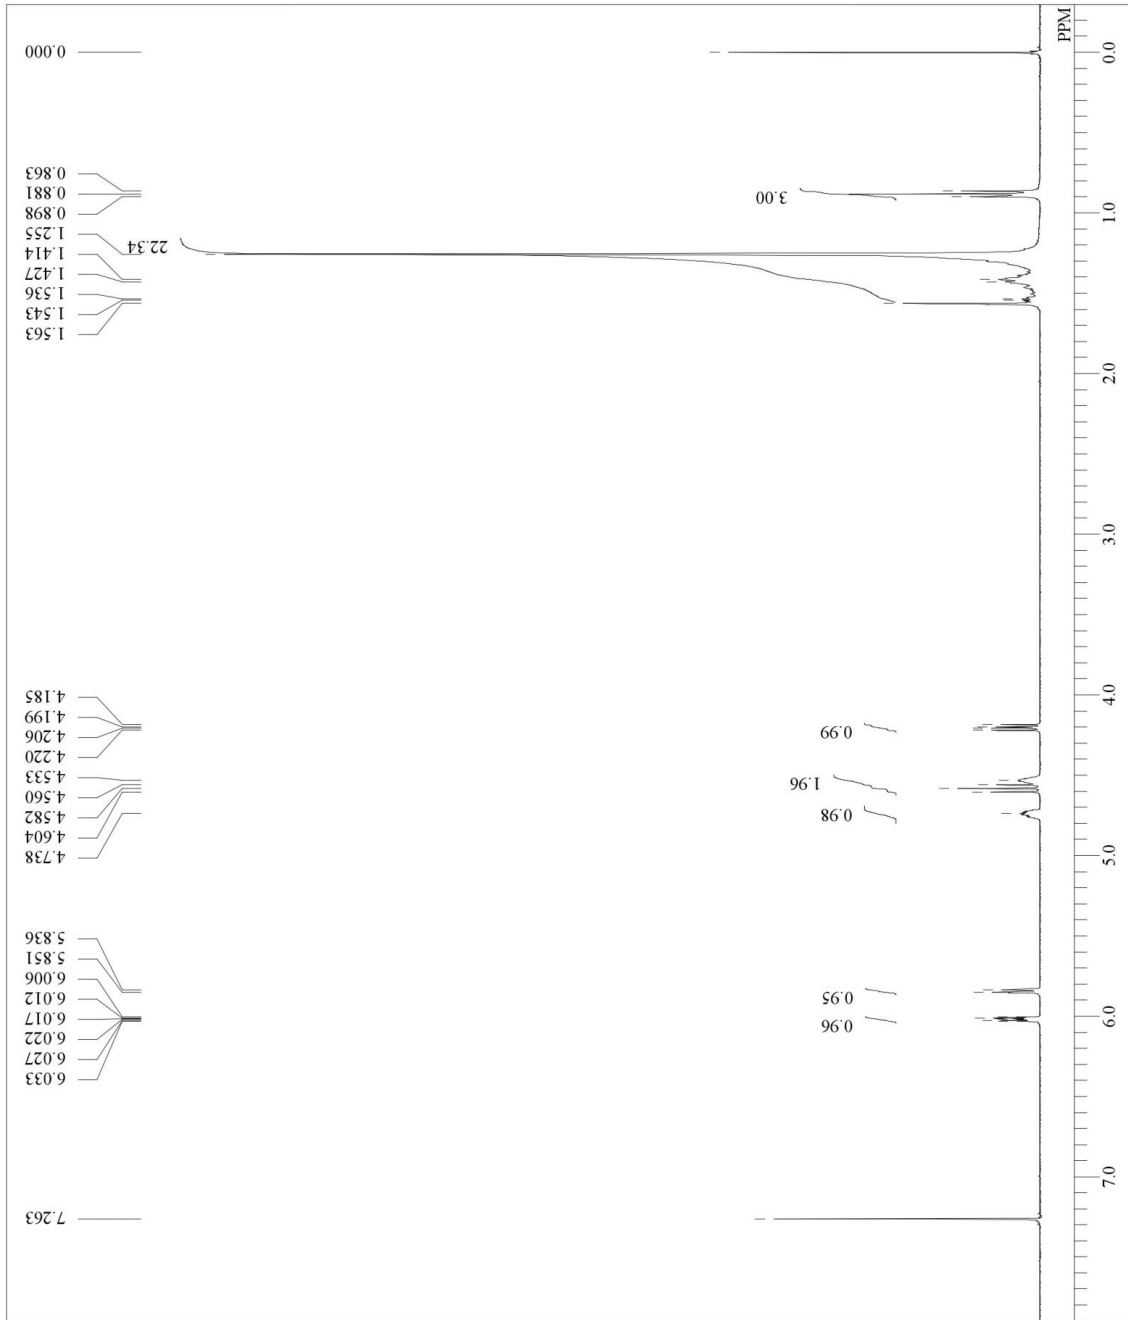

DFILE: Y:\AS02-13-1-dfid.als  
 COMNT: 2i (1H-NMR)  
 DATIM: Fri Oct 26 11:48:26 2012  
 OBNUC: 1H  
 EXMOD: NON  
 OBFRQ: 395.75 MHz  
 OBSET: 124.00 KHz  
 OBFIN: 10277.00 Hz  
 POINT: 16384  
 FREQU: 7912.96 Hz  
 SCANS: 8  
 ACQTM: 2.0705 sec  
 PD: 4.9290 sec  
 PW1: 5.20 ussec  
 IRNUC: 1H  
 CTEMP: 20.3 c  
 SLVNT: CDCL3  
 EXREF: 0.00 ppm  
 BF: 0.24 Hz  
 RGAIN: 18

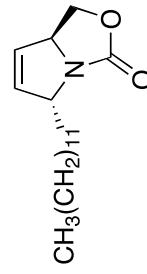

2i

2i (13C-NMR)

DFILE: YAS02-13-13C-did.als  
COMNT: 2i (13C-NMR)  
DATIM: Wed Nov 28 15:08:56 2012  
OBNUC: 13C  
EXMOD: BCM  
OBFRQ: 99.45 MHz  
OBSET: 94.00 KHz  
OBFIN: 10309.00 Hz  
POINT: 32768  
FREQU: 26845.64 Hz  
SCANS: 800  
ACQTM: 1.2206 sec  
PD: 1.7790 sec  
PW1: 5.20 usec  
IRNUC: 1H  
CTEMP: 21.5 c  
SLVNT: CDCL3  
EXREF: 77.00 ppm  
BF: 0.24 Hz  
RGAIN: 23

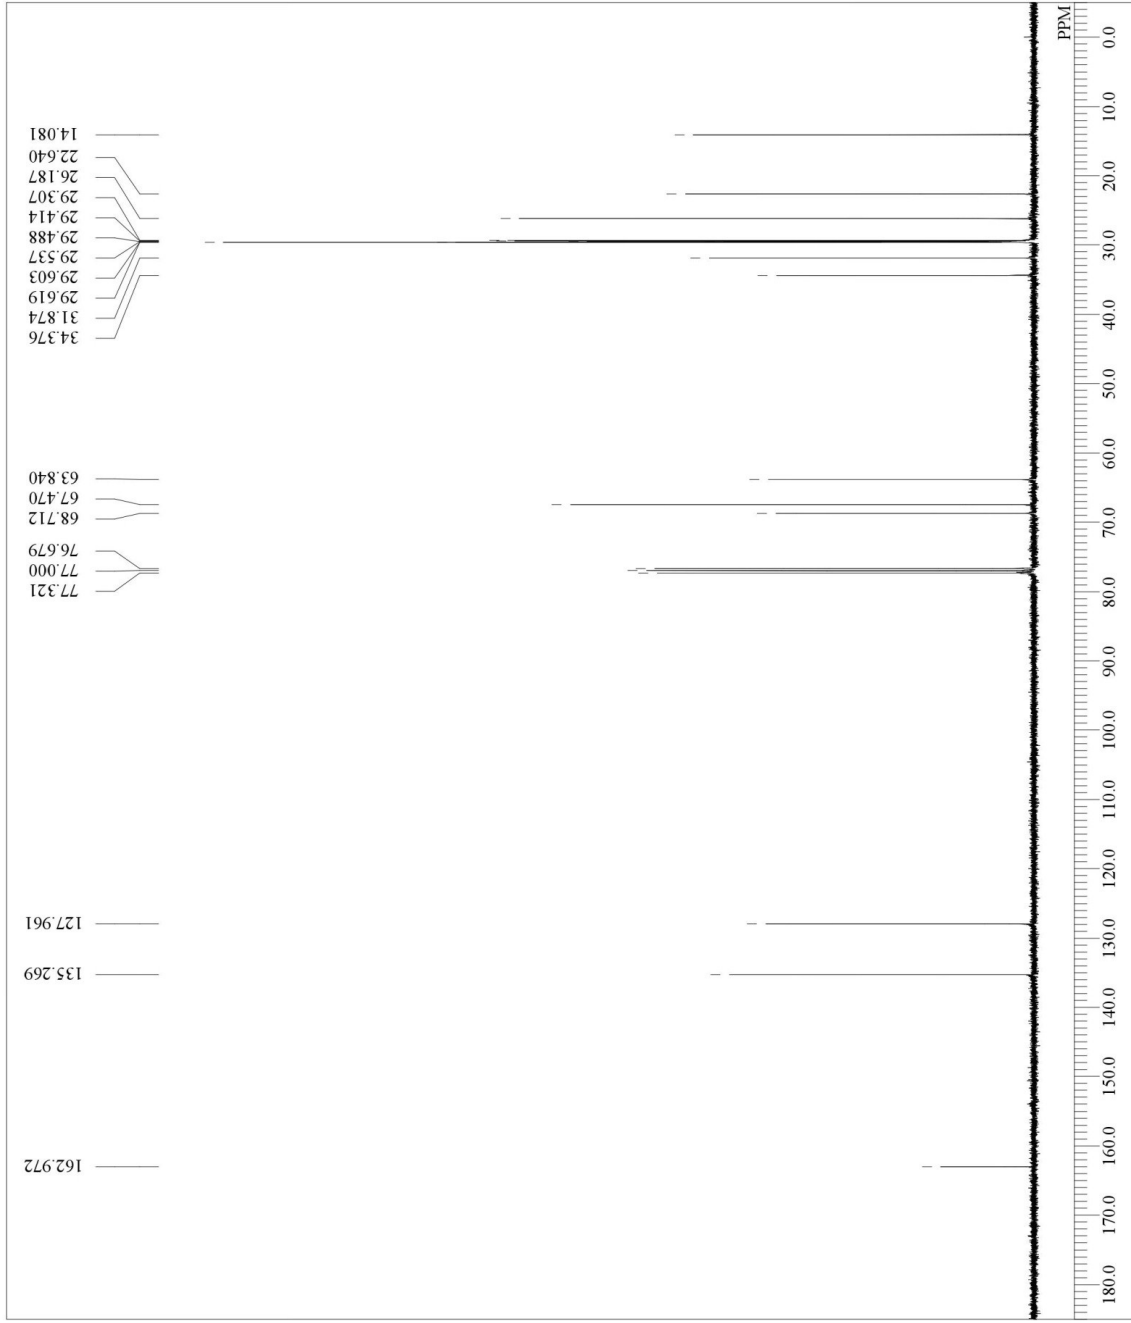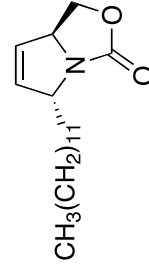

2i



2j (1H-NMR)

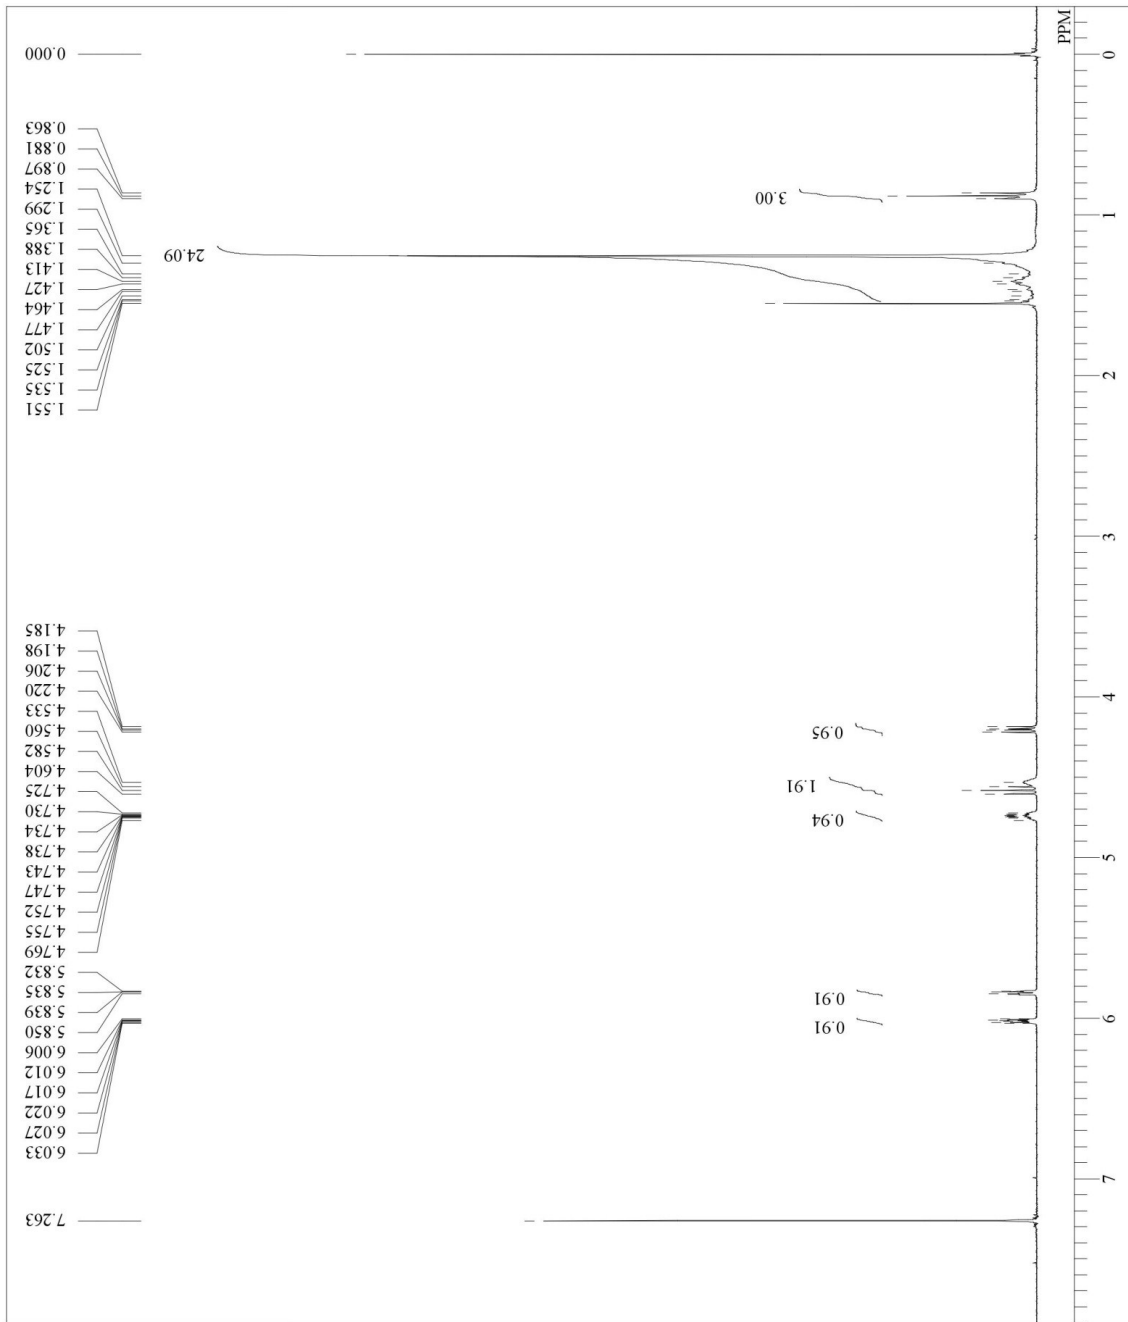

D\FILE Y:\S02-15-2-did.als  
COMNT 2j (1H-NMR)  
DATIM Wed Nov 07 21:50:20 2012  
OBNUC 1H  
EXMOD NON  
OBPRO 395.75 MHz  
OBSET 124.00 KHz  
OBFIN 10277.00 Hz  
POINT 16384  
FREOU 7912.96 Hz  
SCANS 8  
ACQTM 2.0705 sec  
PD 4.9290 sec  
PW1 5.20 usec  
IRNUC 1H  
CTEMP 20.4 c  
SLVNT CDCL3  
EXREF 0.00 ppm  
BF 0.24 Hz  
RGAIN 21

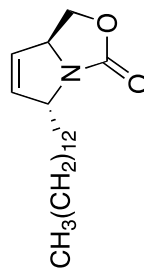

2j

2j (13C-NMR)

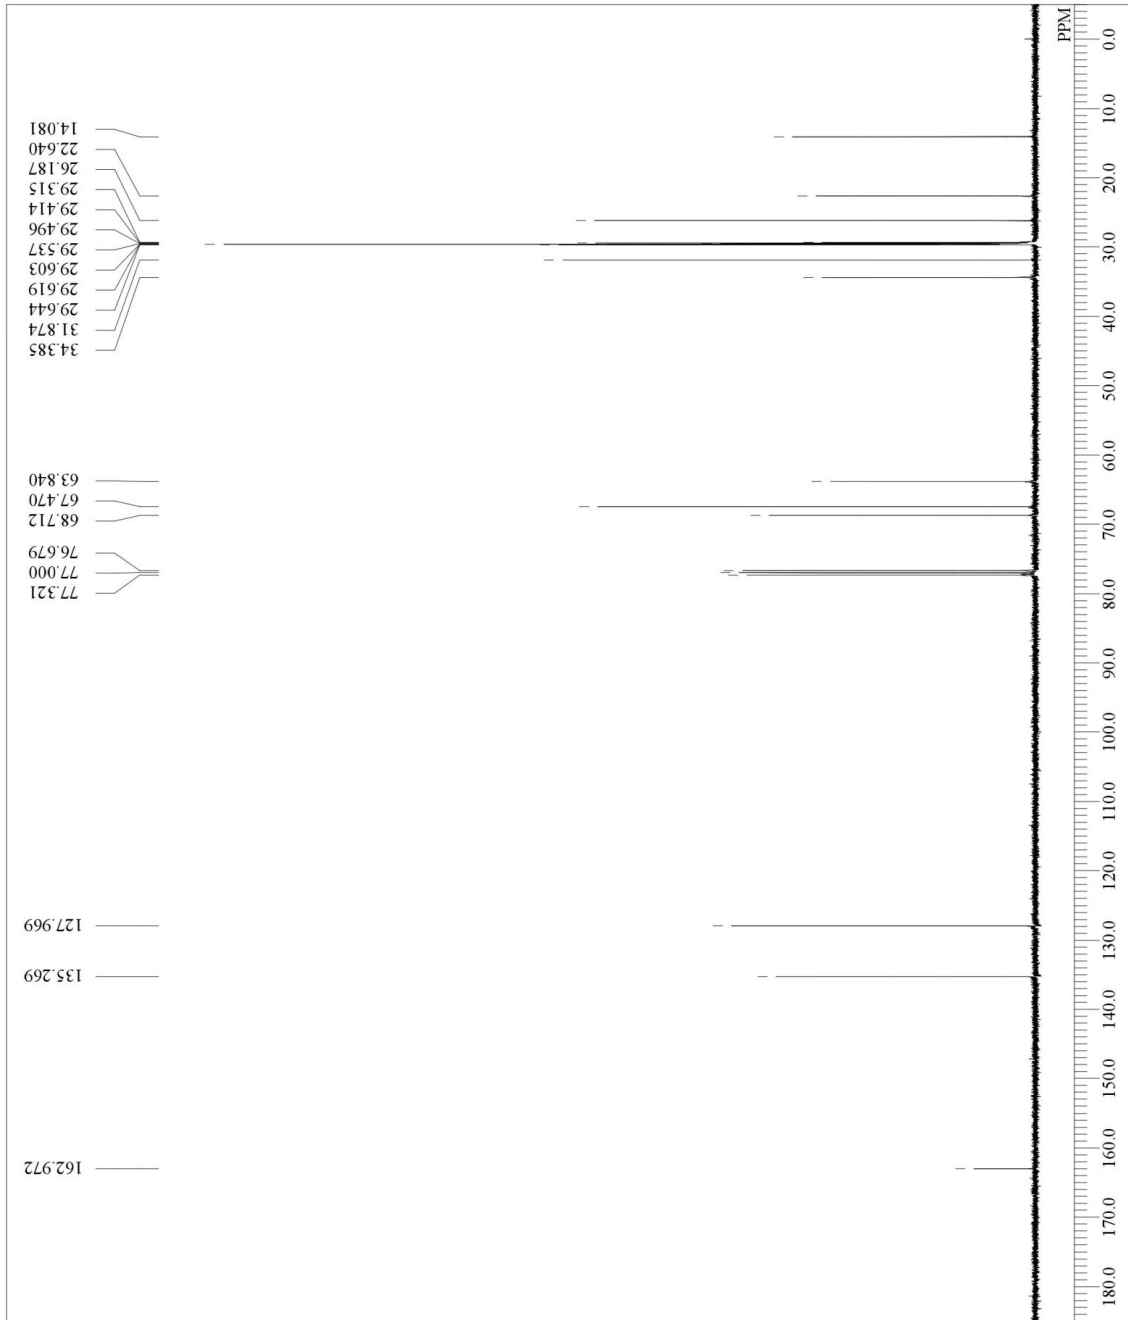

DFILE: YAS02-15-C13-did.als  
COMNT: 2j (13C-NMR)  
DATIM: Thu Nov 22 17:39:24 2012  
OBNUC: 13C  
EXMOD: BCM  
OBFRQ: 99.45 MHz  
OBSET: 94.00 KHz  
OBFIN: 10309.00 Hz  
POINT: 32768  
FREQU: 26845.64 Hz  
SCANS: 664  
ACQTM: 1.2206 sec  
PD: 1.7790 sec  
PW1: 5.20 usec  
IRNUC: 1H  
CTEMP: 21.8 c  
SLVNT: CDCL3  
EXREF: 77.00 ppm  
BF: 0.24 Hz  
RGAIN: 23

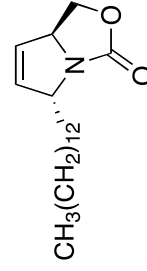

2j

3i (1H-NMR)

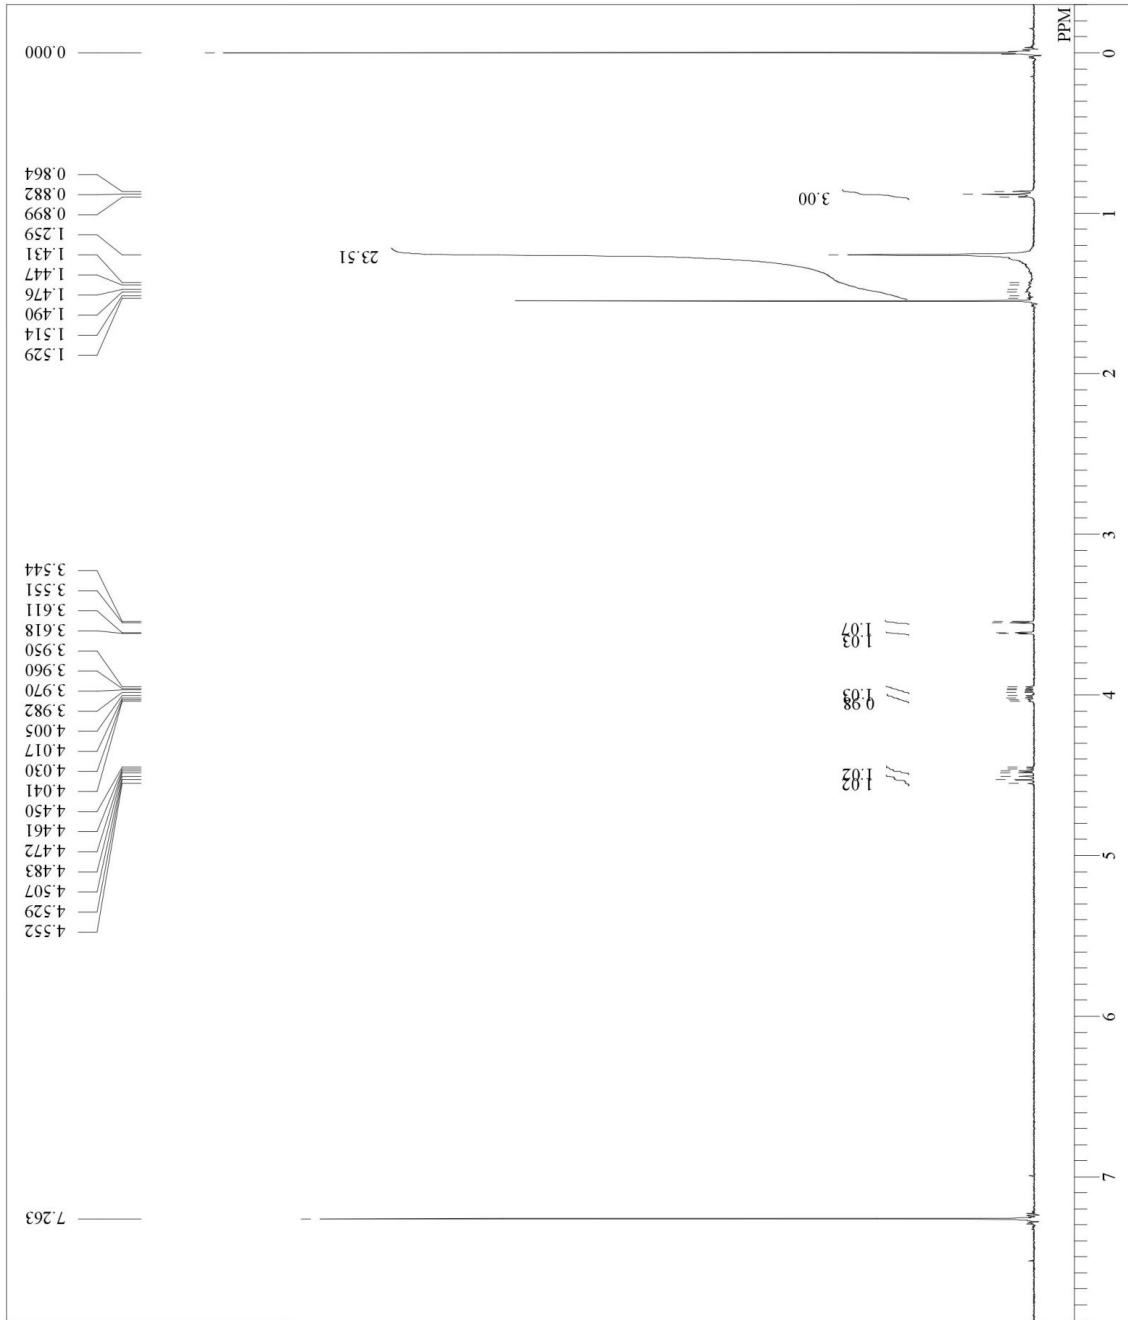

D:FILE Y:\AS02-14-dtd.als  
COMNT 3i (1H-NMR)  
DATIM Wed Oct 31 17:35:57 2012  
OBNUC 1H  
EXMOD NON  
OBROQ 395.75 MHz  
OBSET 124.00 KHz  
OBFIN 10277.00 Hz  
POINT 16384  
FREOU 7912.96 Hz  
SCANS 8  
ACQTIM 2.0705 sec  
PD 4.9290 sec  
PW1 5.20 usec  
IRNUC 1H  
CTEMP 20.9 c  
SLVNT CDCL3  
EXREF 0.00 ppm  
BF 0.24 Hz  
RGAIN 24

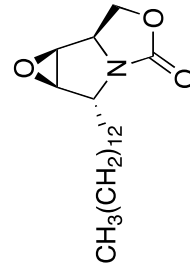

3i

3i (13C-NMR)

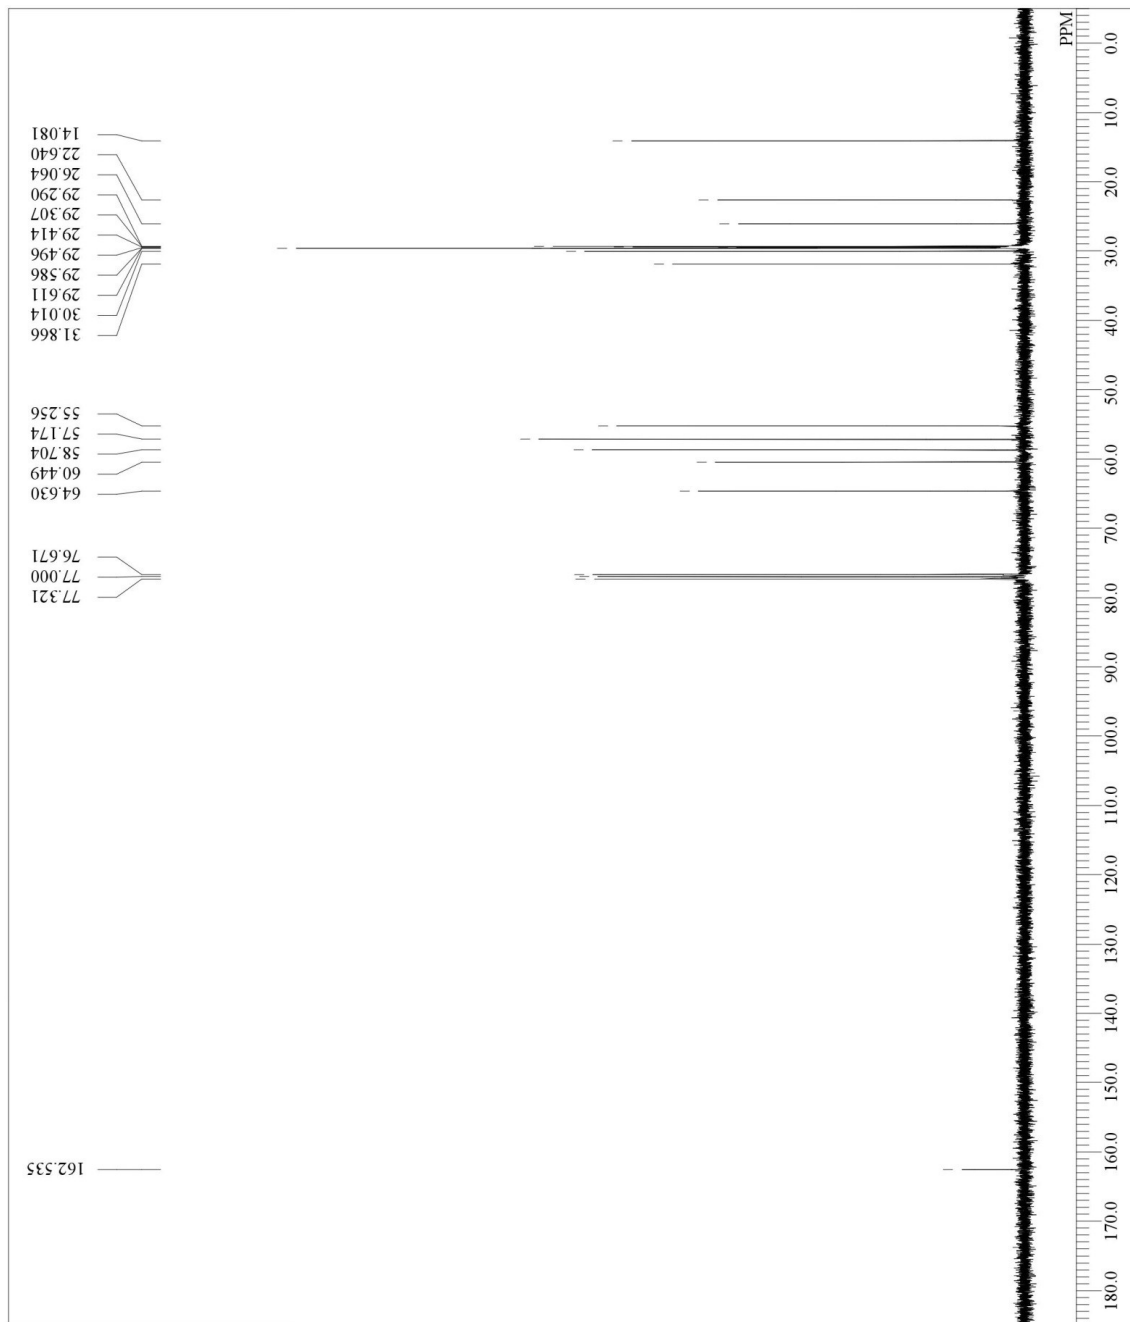

DFILE Y:\AS02-14-2-C13-dfid.als  
COMNT 3i (13C-NMR)  
DATIM Wed Jan 16 12:19:31 2013  
OBNUC 13C  
EXMOD BCM  
OBFRQ 99.45 MHz  
OBSET 94.00 KHz  
OBFIN 10309.00 Hz  
POINT 32768  
FREOU 26845.64 Hz  
SCANS 480  
ACQTM 1.2206 sec  
PD 1.7790 sec  
PW1 5.20 uscc  
IH 1H  
IRNUC 22.1 c  
CTEMP CDCL3  
SLVNT 77.00 ppm  
EXREF 0.24 Hz  
BF 23  
RGAIN

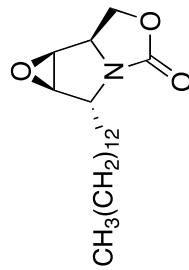

3i

3j (1H-NMR)

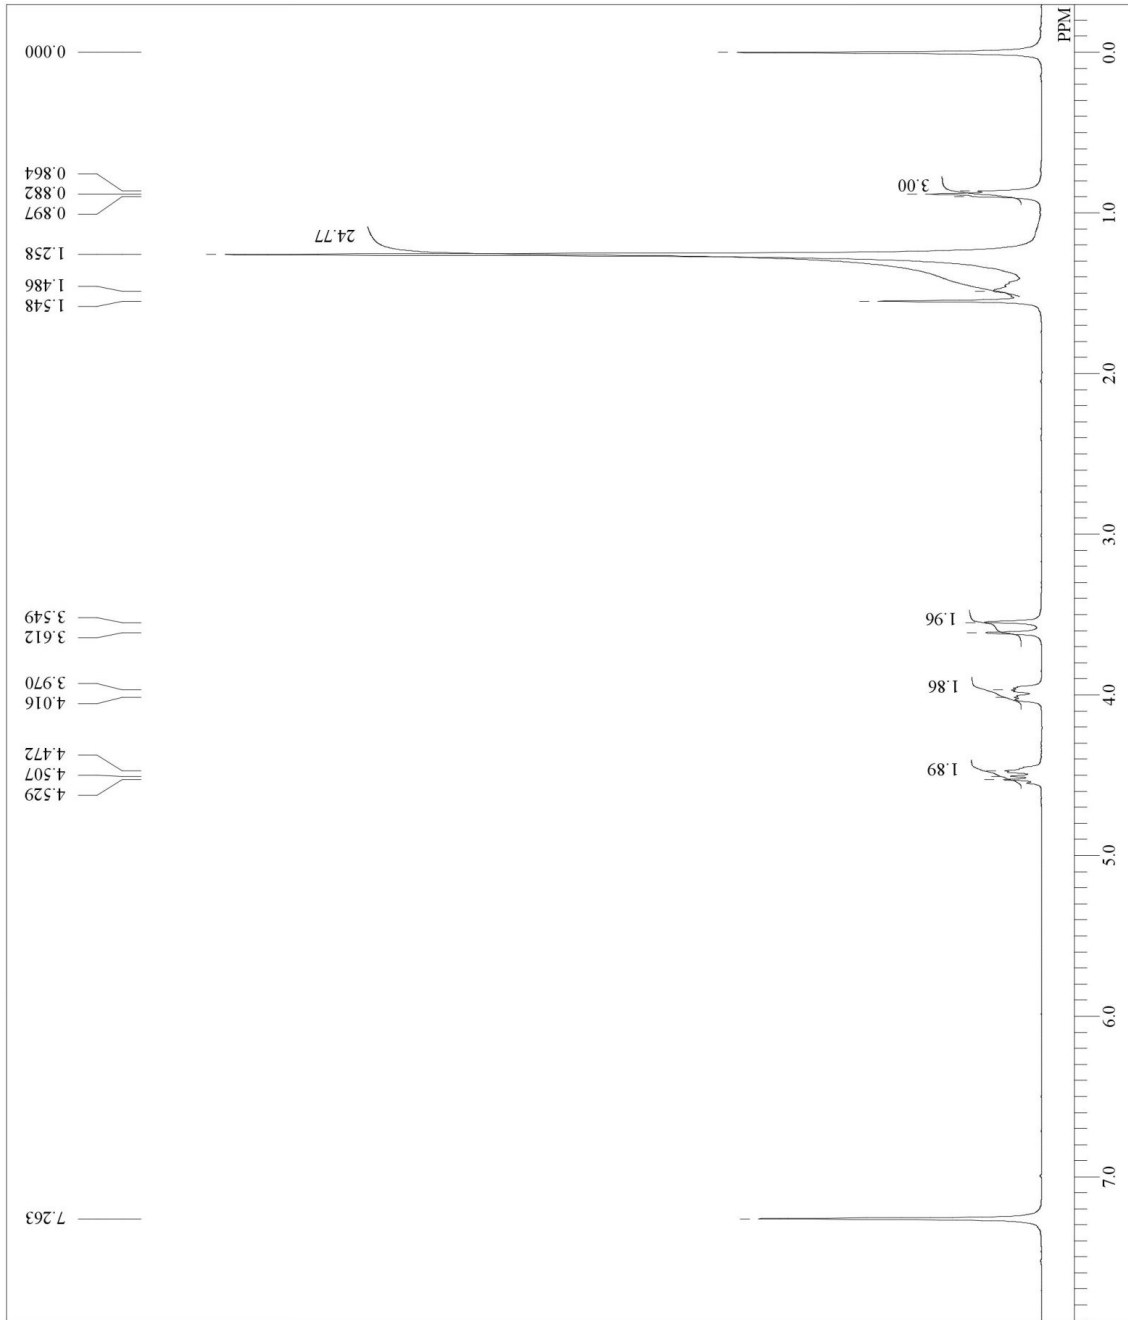

DFILE Y:\AS02-17-1-dfid.als  
COMINT 3j (1H-NMR)  
DATIM Fri Nov 09 19:25:06 2012  
OBNUC 1H  
EXMOD NON  
OBFRQ 395.75 MHz  
OBSET 124.00 KHz  
OBFIN 10277.00 Hz  
POINT 16384  
FREQU 7912.96 Hz  
SCANS 8  
ACQTIM 2.0705 sec  
PD 4.9290 sec  
PW1 5.20 usec  
IRNUC 1H  
CTEMP 21.0 c  
SLVNT CDCL3  
EXREF 0.00 ppm  
BF 4.20 Hz  
RGAIN 21

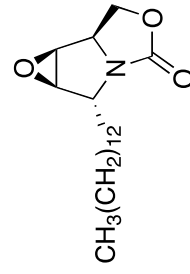

3j

3j (13C-NMR)

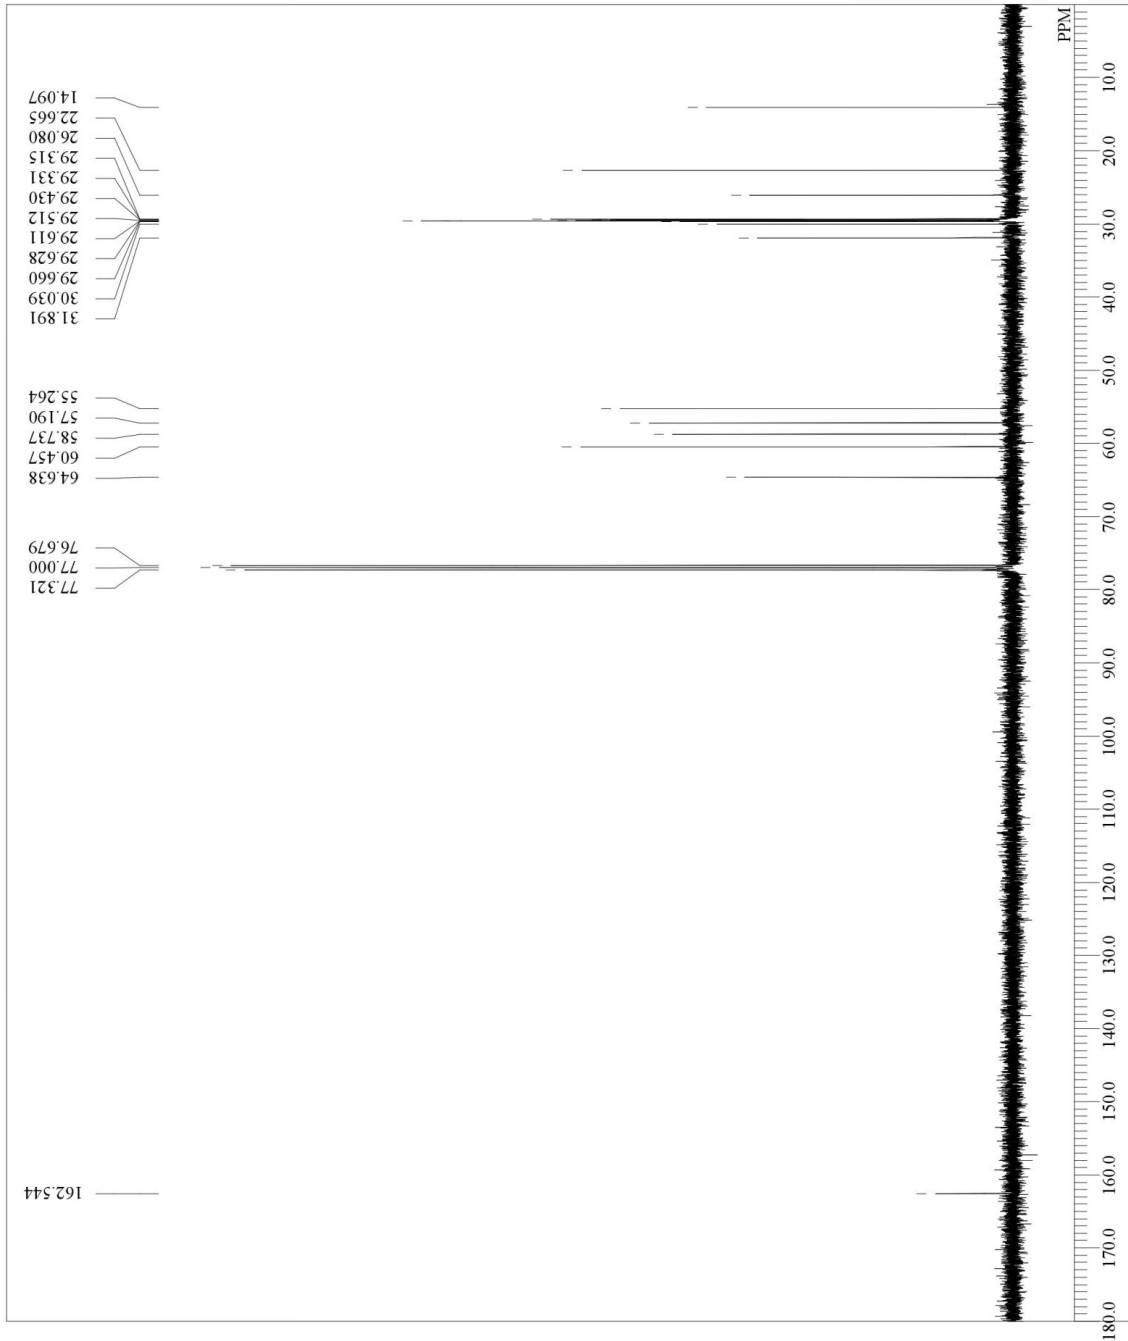

DFILE Y:\AS02-17-13C-did.als  
COMNT 3j (13C-NMR)  
DATIM Tue Jan 22 16:10:39 2013  
OBNUC 13C  
EXMOD BCM  
OBFRQ 99.45 MHz  
OBSET 94.00 KHz  
OBFIN 10309.00 Hz  
POINT 32768  
FREQU 26845.64 Hz  
SCANS 640  
ACQTM 1.2206 sec  
PD 1.7790 sec  
PW1 5.20 usec  
IH 1H  
IRNUC 21.8 c  
CTEMP CDCL3  
SLVNT 77.00 ppm  
EXREF 0.24 Hz  
BF 23  
RGAIN

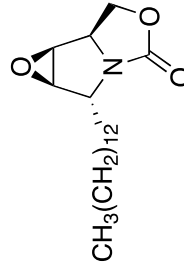

3j

4i (1H-NMR)

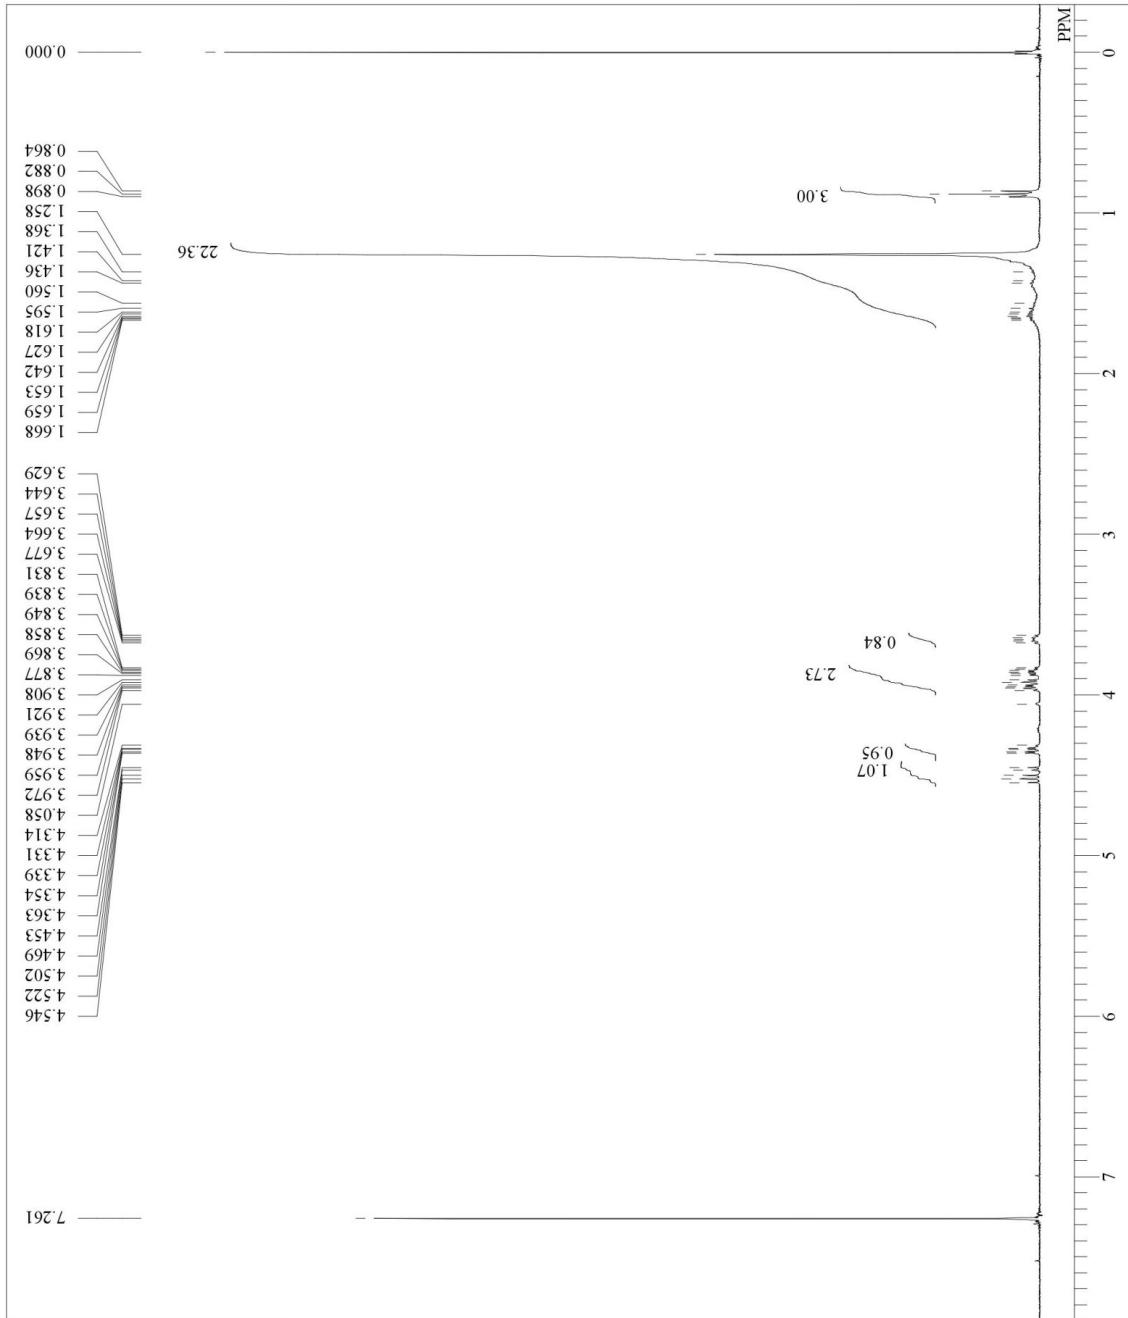

D:FILE Y:\S02-16-1-dfid.als  
COMINT 4i (1H-NMR)  
DATIM Wed Nov 07 21:41:43 2012  
OBNUC 1H  
EXMOD NON  
OBPRO 395.75 MHz  
OBSET 124.00 KHz  
OBFIN 10277.00 Hz  
POINT 16384  
FREOU 7912.96 Hz  
SCANS 8  
ACQTM 2.0705 sec  
PD 4.9290 sec  
PW1 5.20 usec  
IRNUC 1H  
CTEMP 21.3 c  
SLVNT CDCL3  
EXREF 0.00 ppm  
BF 0.24 Hz  
RGAIN 22

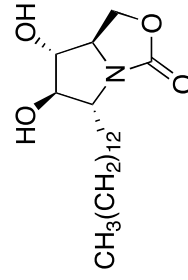

4i

4i (13C-NMR)

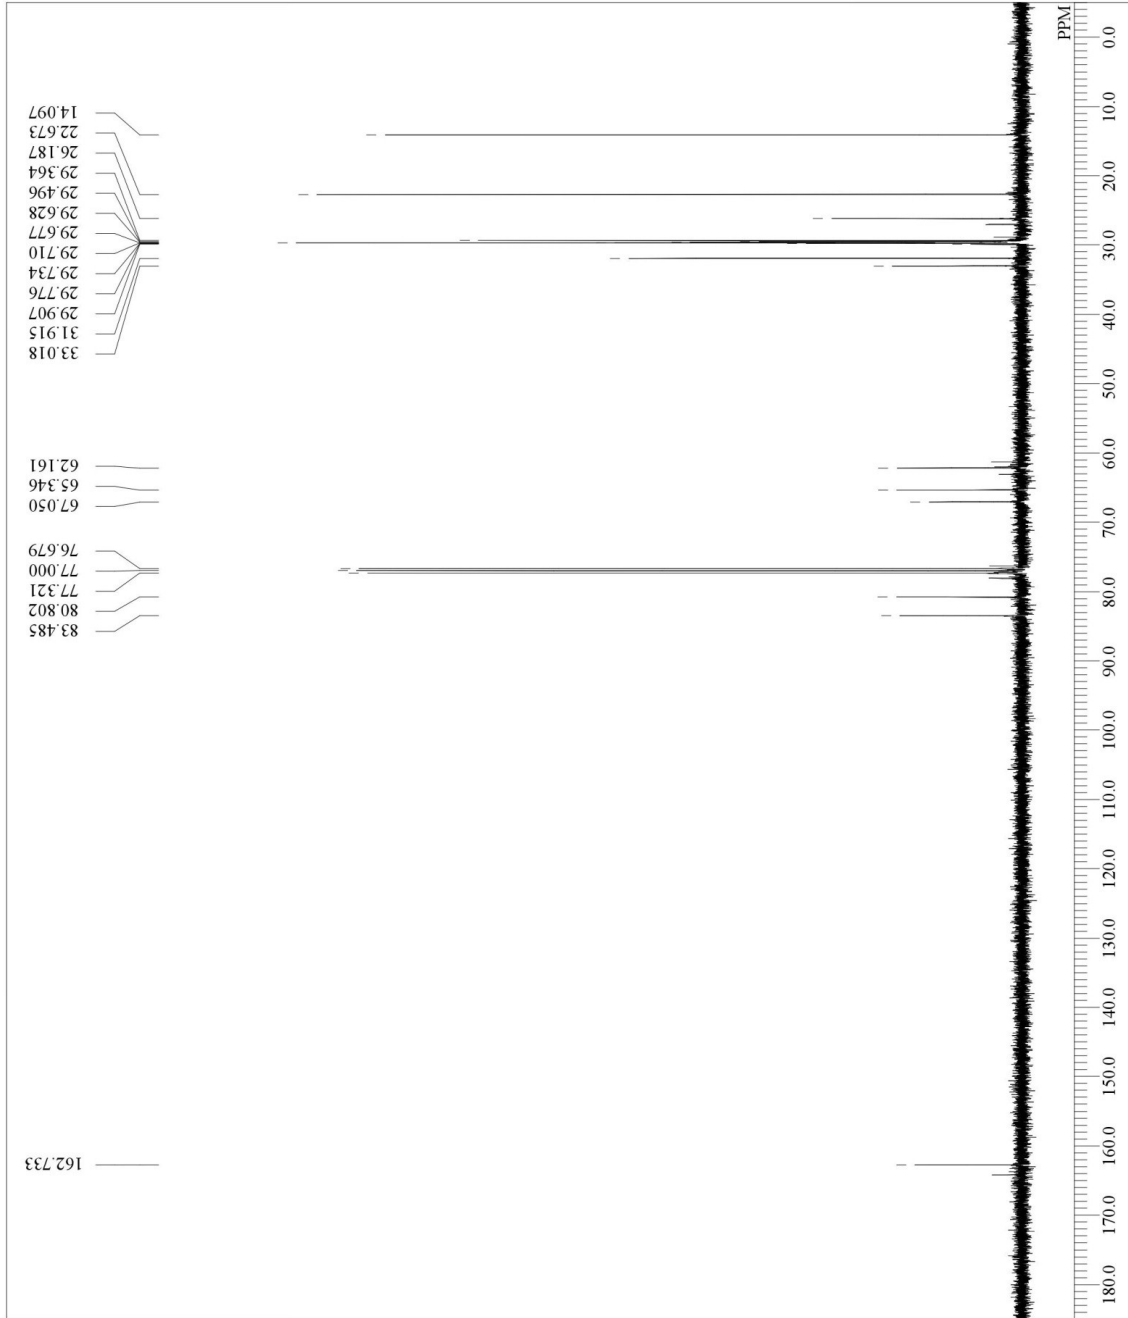

DFILE: YAS02-16-13C-did.als  
COMNT: 4i (13C-NMR)  
DATIM: Wed Feb 27 15:11:47 2013  
OBNUC: 13C  
EXMOD: BCM  
OBFRQ: 99.45 MHz  
OBSET: 94.00 KHz  
OBFIN: 10309.00 Hz  
POINT: 32768  
FREQU: 26845.64 Hz  
SCANS: 424  
ACQTM: 1.2206 sec  
PD: 1.7790 sec  
PW1: 5.20 usec  
IRNUC: 1H  
CTEMP: 21.3 c  
SLVNT: CDCL3  
EXREF: 77.00 ppm  
BF: 0.24 Hz  
RGAIN: 23

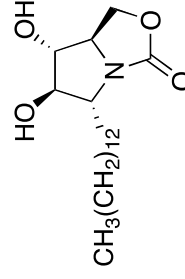

4i



4j (1H-NMR)

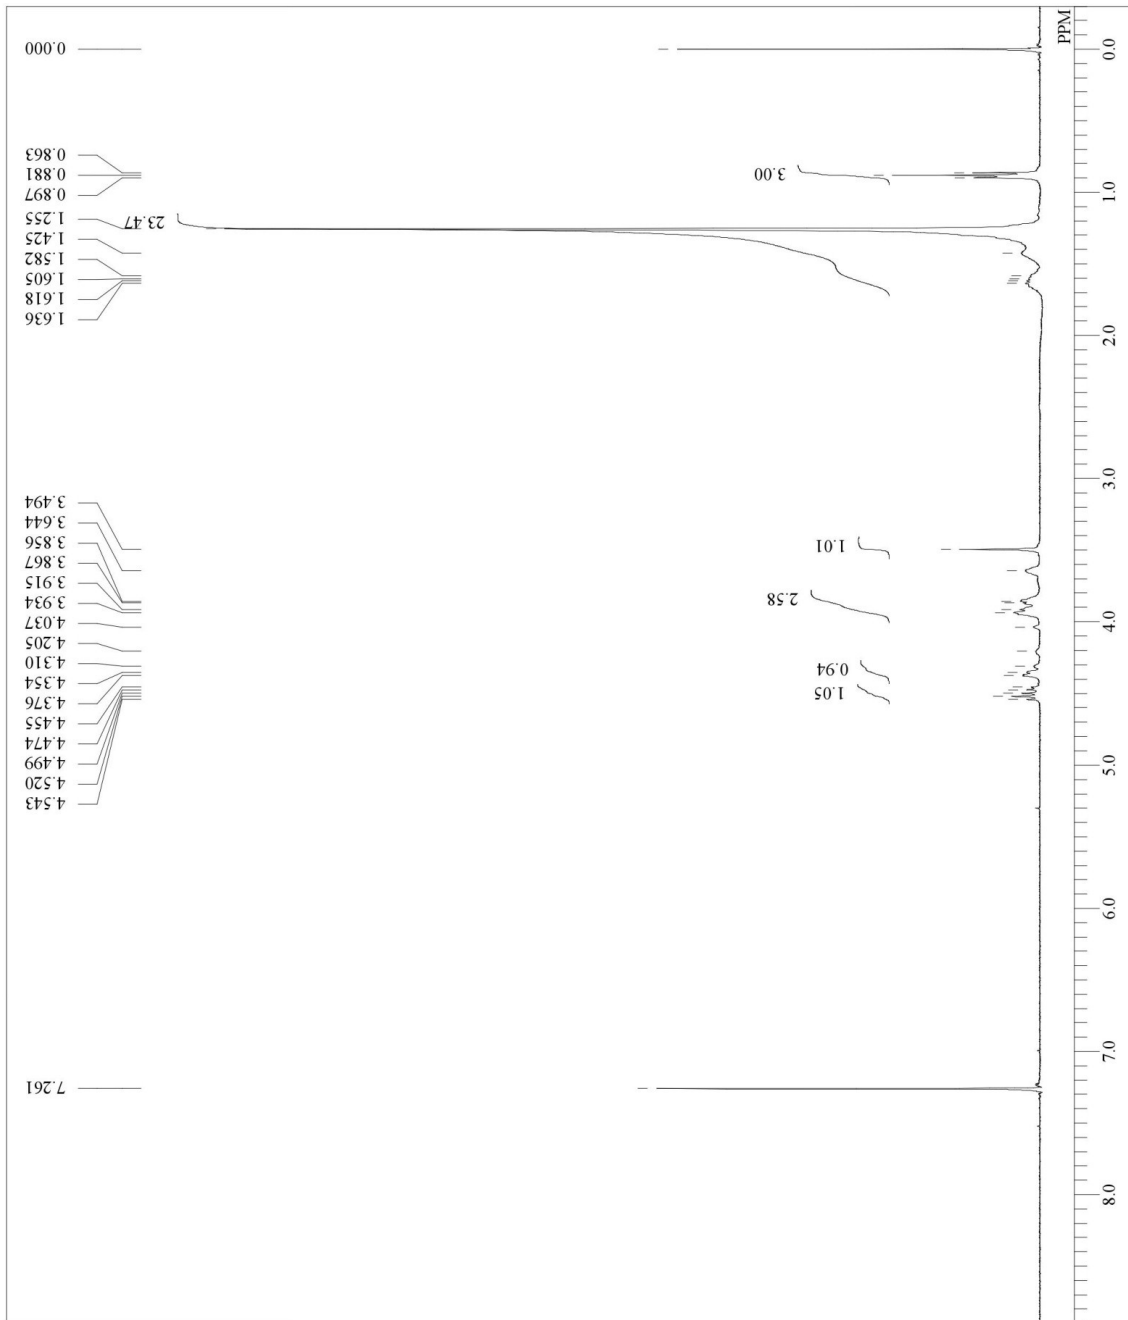

DFILE: Y:\AS02-18-3-dfid.als  
 COMINT: 4j (1H-NMR)  
 DATIM: Wed Nov 14 18:50:18 2012  
 IH  
 NON  
 OBNUC 395.75 MHz  
 EXMOD 124.00 KHz  
 OBSET 10277.00 Hz  
 OBFIN 16384  
 POINT 7912.96 Hz  
 FREQU 8  
 SCANS 2.0705 sec  
 ACQTIM 4.9290 sec  
 PD 5.20 usec  
 PW1 20.8 c  
 IRNUC 1H  
 CTEMP CDCL3  
 SLVNT 0.00 ppm  
 EXREF 0.24 Hz  
 BF 19  
 RGAIN

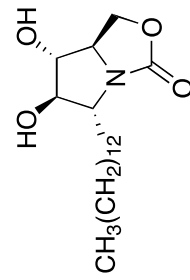

4j

4j (13C-NMR)

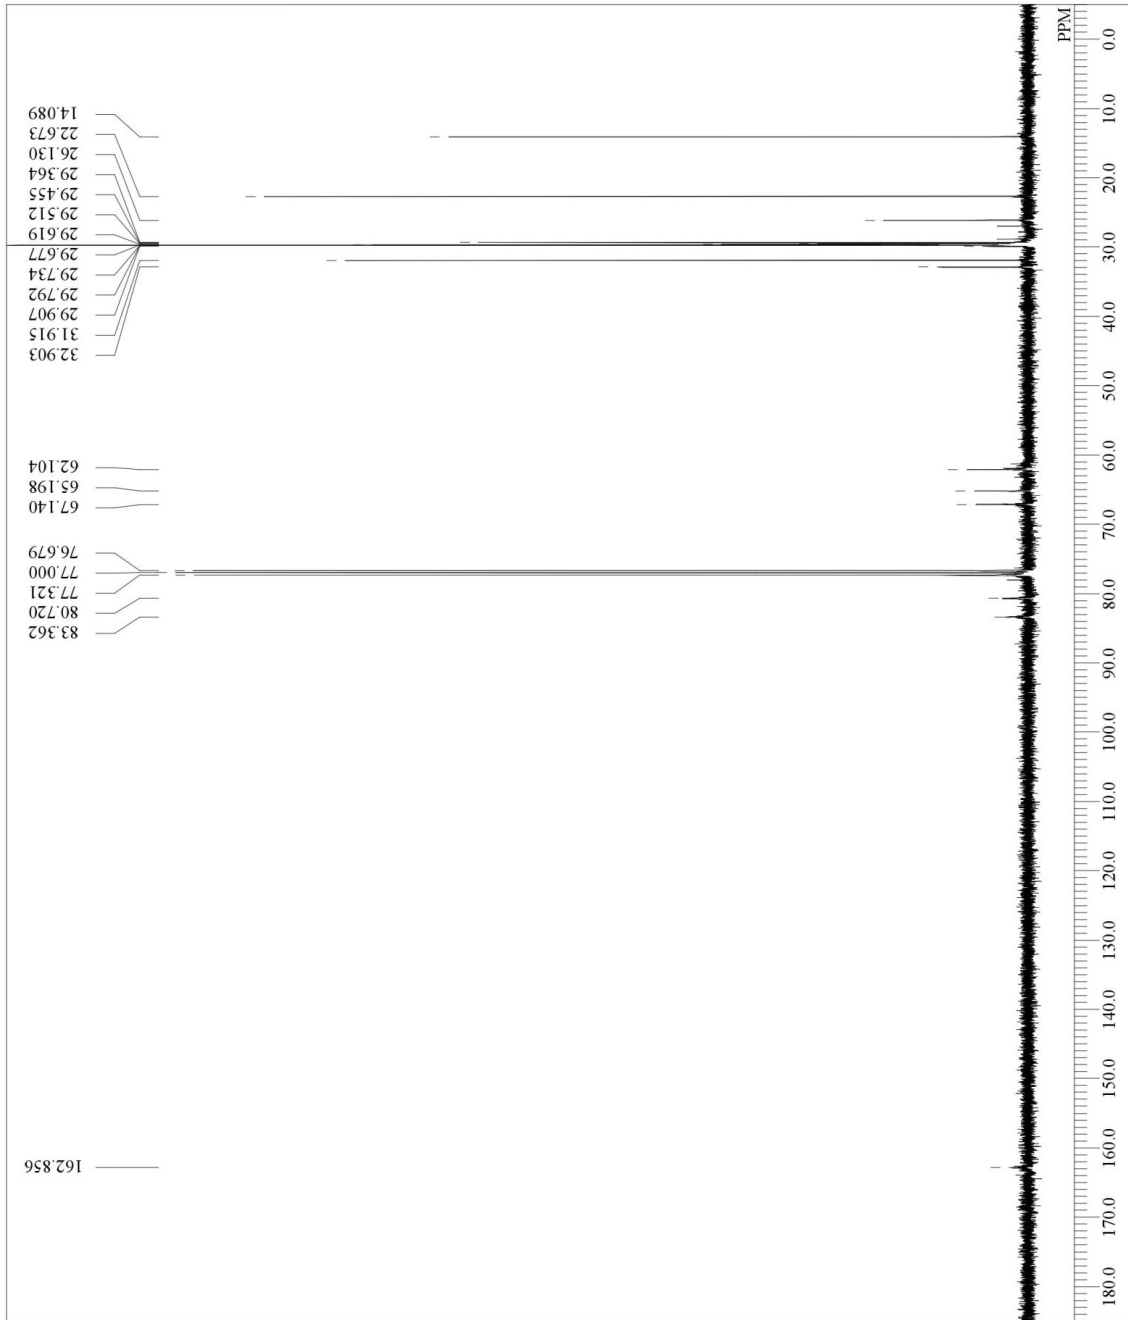

DFILE Y:\AS02-18-13C-did.als  
COMNT 4j (13C-NMR)  
DATIM Tue Jan 22 10:22:52 2013  
OBNUC 13C  
EXMOD BCM  
OBFRQ 99.45 MHz  
OBSET 94.00 KHz  
OBFIN 10309.00 Hz  
POINT 32768  
FREQU 26845.64 Hz  
SCANS 960  
ACQTM 1.2206 sec  
PD 1.7790 sec  
PW1 5.20 usec  
IRNUC 1H  
CTEMP 21.3 c  
SLVNT CDCL3  
EXREF 77.00 ppm  
BF 0.24 Hz  
RGAIN 23

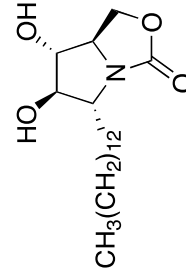

4j

5i (1H-NMR)

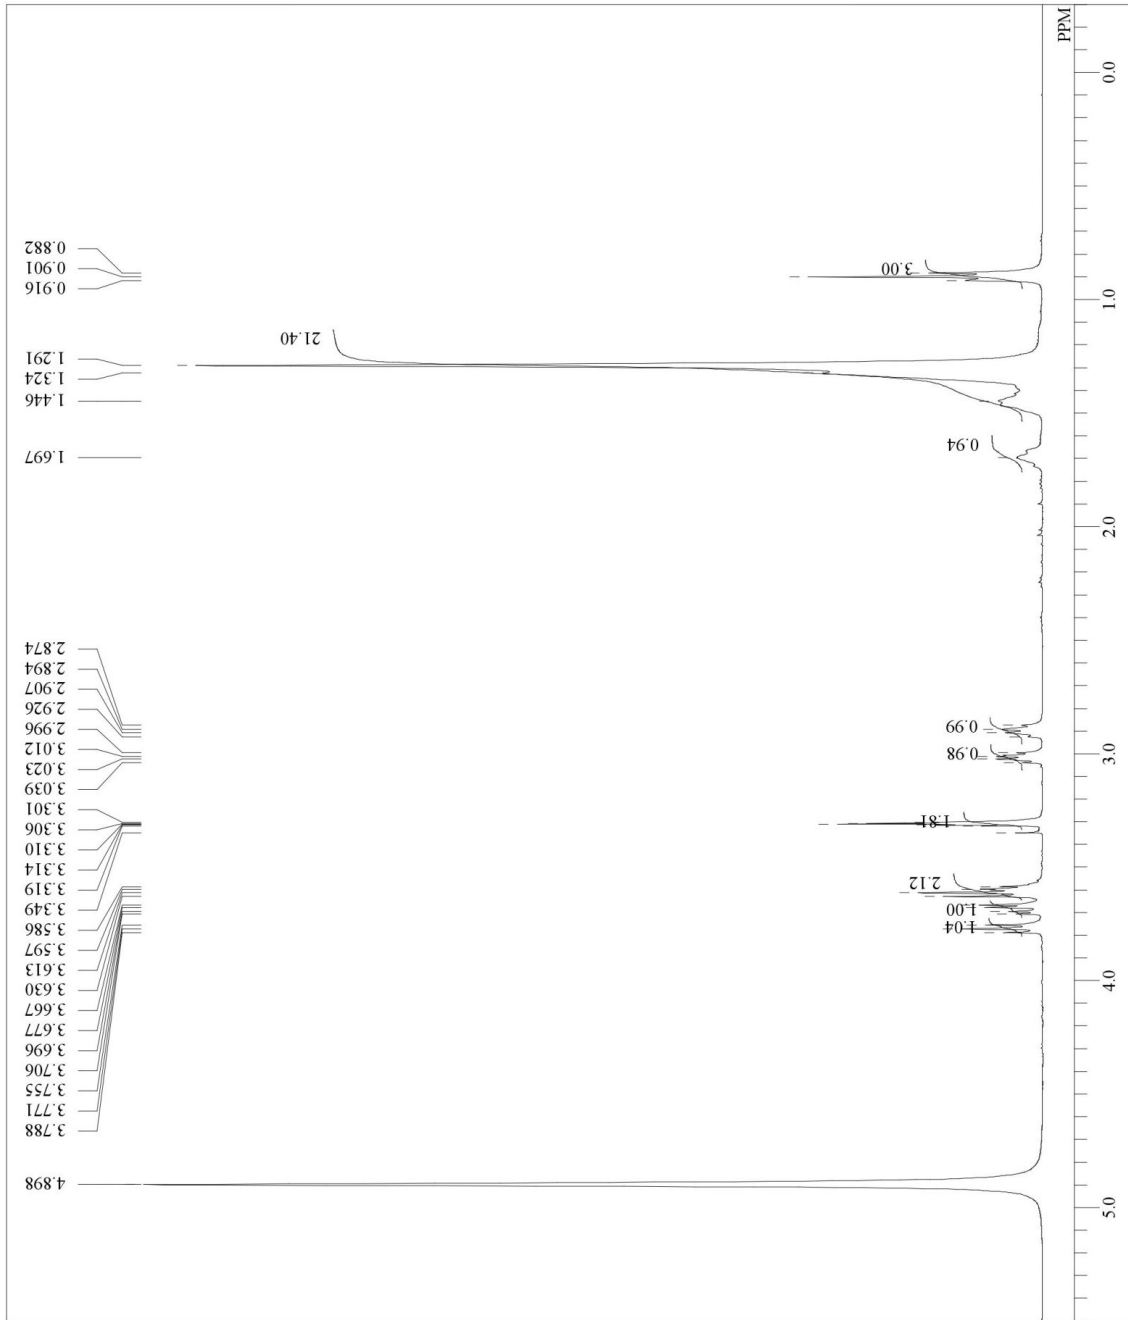

DFILE: YAS02-19-2-dfid.als  
COMNT: 5i (1H-NMR)  
DATIM: Tue Nov 13 18:31:33 2012  
OBNUC: 1H  
EXMOD: NON  
OBPRO: 395.75 MHz  
OBSET: 124.00 KHz  
OBFIN: 10277.00 Hz  
POINT: 16384  
FREOU: 7912.96 Hz  
SCANS: 8  
ACQTM: 2.0705 sec  
PD: 4.9290 sec  
PW1: 5.20 usec  
IRNUC: 1H  
CTEMP: 19.1 c  
SLVNT: CD3OD  
EXREF: 3.31 ppm  
BF: 0.24 Hz  
RGAIN: 13

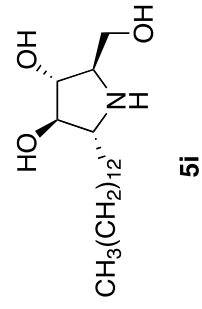

5i (13C-NMR)

DFILE: YAS02-19-C13-did.als  
COMNT: 5i (13C-NMR)  
DATIM: Tue Nov 13 18:54:08 2012  
OBNUC: 13C  
EXMOD: BCM  
OBFRQ: 99.45 MHz  
OBSET: 94.00 KHz  
OBFIN: 10309.00 Hz  
POINT: 32768  
FREQU: 26845.64 Hz  
SCANS: 380  
ACQTM: 1.2206 sec  
PD: 1.7790 sec  
PW1: 5.20 usec  
IRNUC: 1H  
CTEMP: 21.3 c  
SLVNT: CD3OD  
EXREF: 49.00 ppm  
BF: 0.24 Hz  
RGAIN: 22

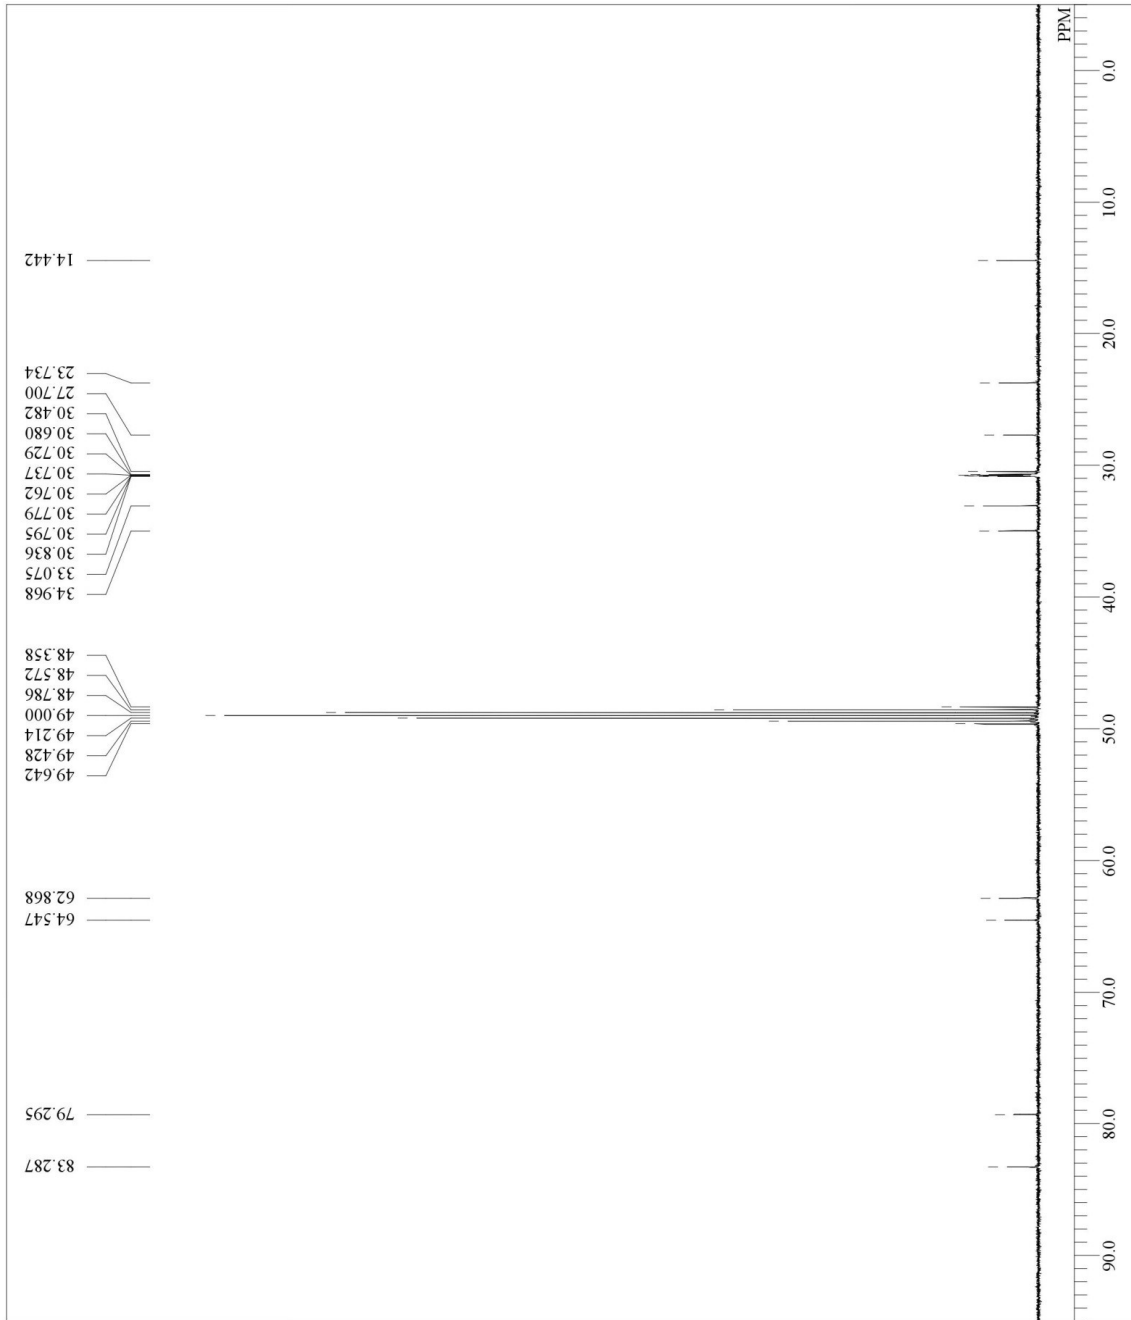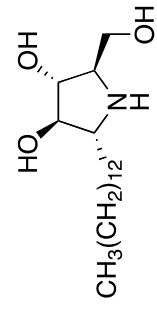

5i

5j (1H-NMR)

DFILE Y:\S02-20-did.als  
COMNT 5j (1H-NMR)  
DATIM Thu Nov 15 18:53:44 2012  
OBNUC 1H  
EXMOD NON  
OBFRQ 395.75 MHz  
OBSET 124.00 KHz  
OBFIN 10277.00 Hz  
POINT 16384  
FREOU 7912.96 Hz  
SCANS 8  
ACQTM 2.0705 sec  
PD 4.9290 sec  
PW1 5.20 usec  
IRNUC 1H  
CTEMP 20.6 c  
SLVNT CD3OD  
EXREF 3.31 ppm  
BF 0.24 Hz  
RGAIN 18

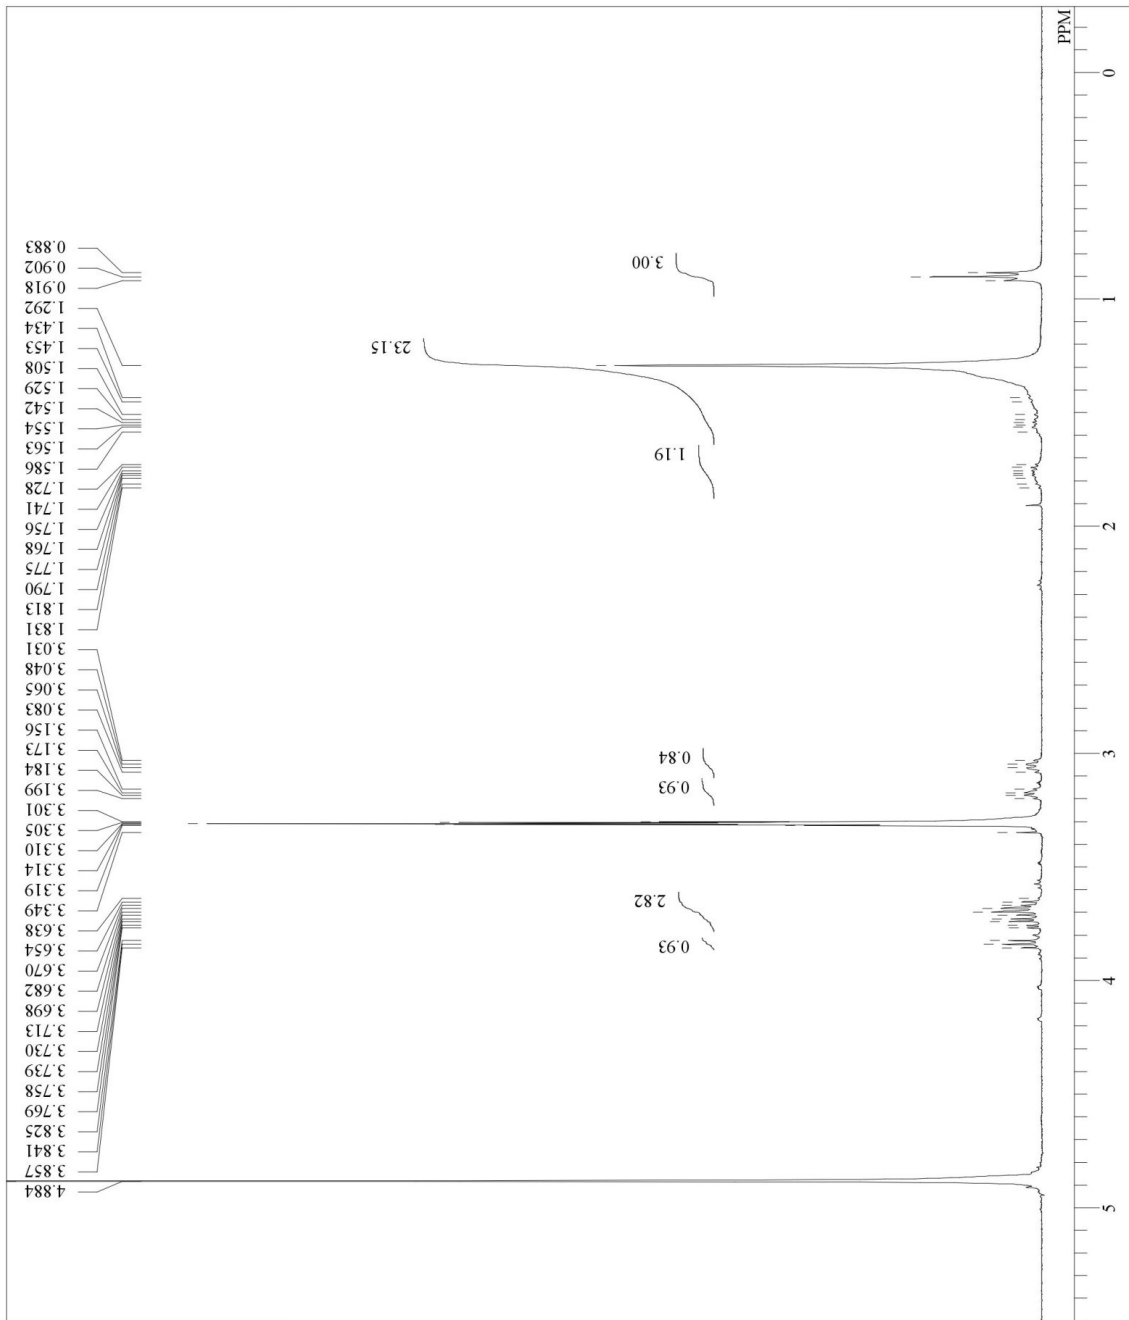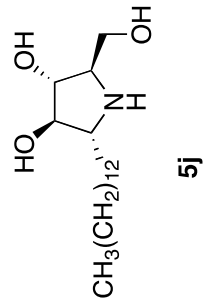

5j (13C-NMR)

D\FILE YAS02-20-2-C13-dtd.als  
COMNT 5j (13C-NMR)  
DATIM Mon Nov 19 12:59:34 2012  
OBNUC 13C  
EXMOD BCM  
OBPRO 99.45 MHz  
OBSET 94.00 KHz  
OBFIN 1030900 Hz  
POINT 32768  
FREOU 26845.64 Hz  
SCANS 800  
ACQTM 1.2206 sec  
PD 1.7790 sec  
PW1 5.20 ussec  
IH 1H  
IRNUC 21.4 e  
CTEMP CD3OD  
SLVNT 49.00 ppm  
EXREF BF 0.24 Hz  
RGAIN 22

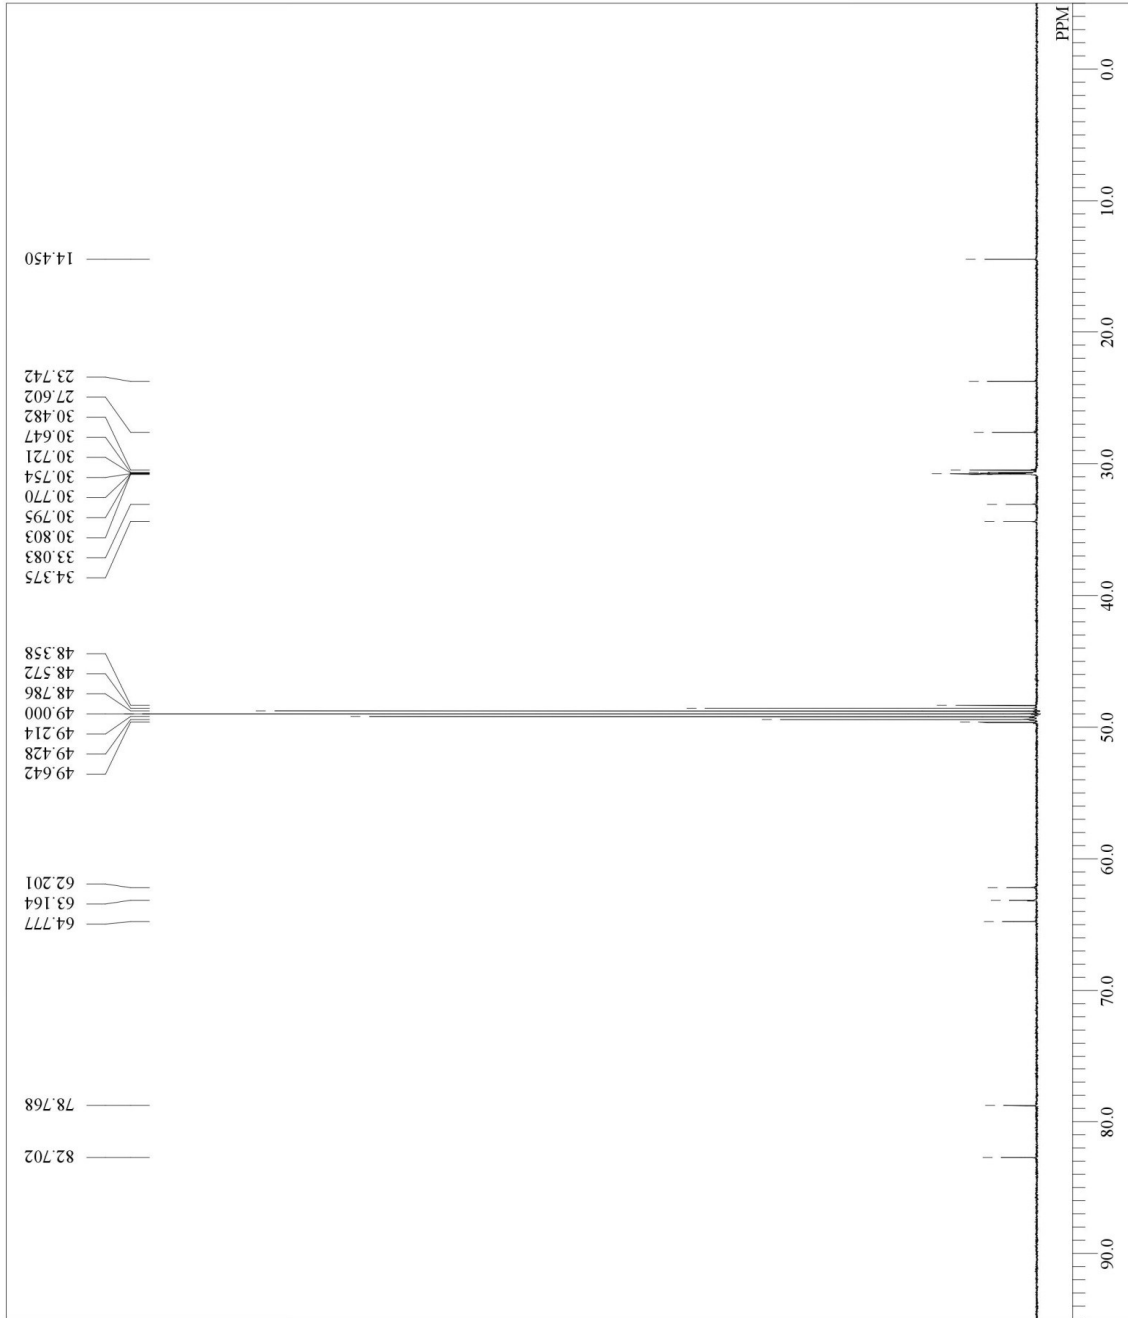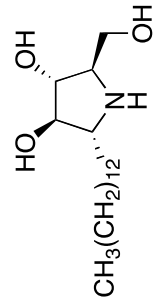

5j

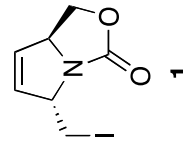

YAS01-14-28-dtd.lals  
 YAS01-14-28  
 Wed Jul 04 16:08:54 2012

DFILE  
 COMNT  
 DATIM  
 OBNUC  
 EXMOD  
 OBFRO  
 OBSET  
 OBFIN  
 POINT  
 FREQU  
 SCANS  
 ACQTM  
 PD  
 PW1  
 IRNUC  
 CTEMP  
 SLVNT  
 EXREF  
 BF  
 RGAIN

1H  
 NON  
 395.75 MHz  
 124.00 KHz  
 10277.00 Hz  
 16384  
 7912.96 Hz  
 8  
 2.0705 sec  
 4.9290 sec  
 5.50 usec  
 1H  
 21.6 c  
 CDCL3  
 0.00 ppm  
 0.24 Hz  
 17

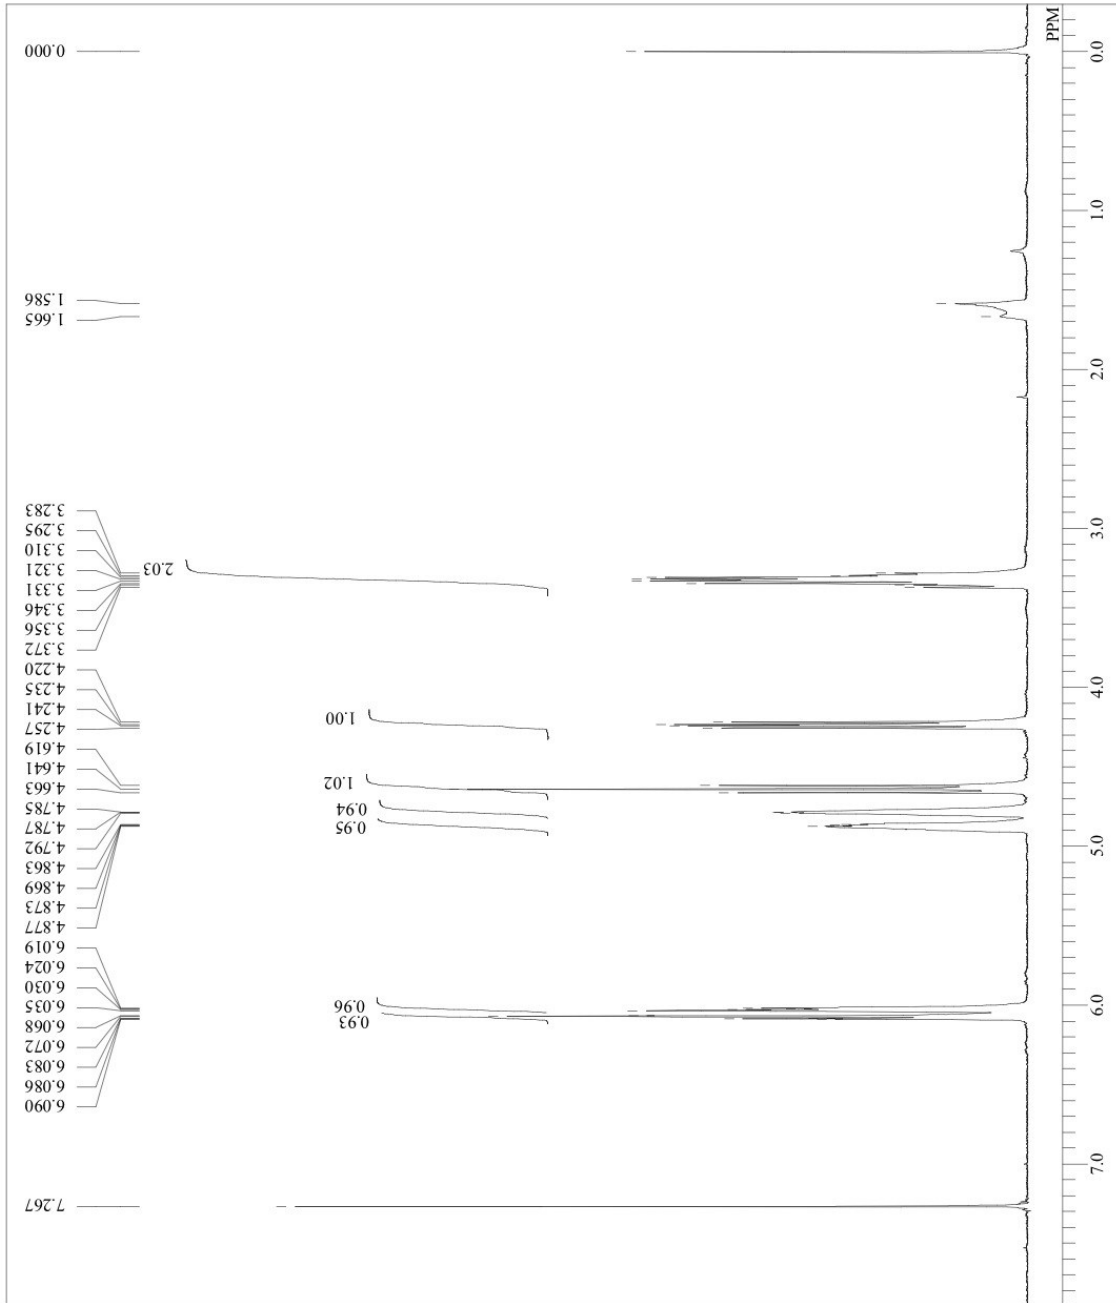

KEM\_1\_29\_1\_PRODUCT-T.als  
 KEM\_1\_28\_1\_PRODUCT  
 Wed Jul 02 16:34:38 2008

DFILE  
 COMNT  
 DATIM  
 OBNUC  
 EXMOD  
 OBFREQ  
 OBSET  
 OBFIN  
 POINT  
 FREQU  
 SCANS  
 ACQTM  
 PD  
 PW1  
 IRNUC  
 CTEMP  
 SLVNT  
 EXREF  
 BF  
 RGAIN

395.75 MHz  
 124.00 KHz  
 10277.00 Hz  
 16384  
 7912.96 Hz  
 8  
 2.0705 sec  
 4.9290 sec  
 5.20 usec  
 1H  
 23.1 c  
 CDCL3  
 7.26 ppm  
 0.24 Hz  
 22

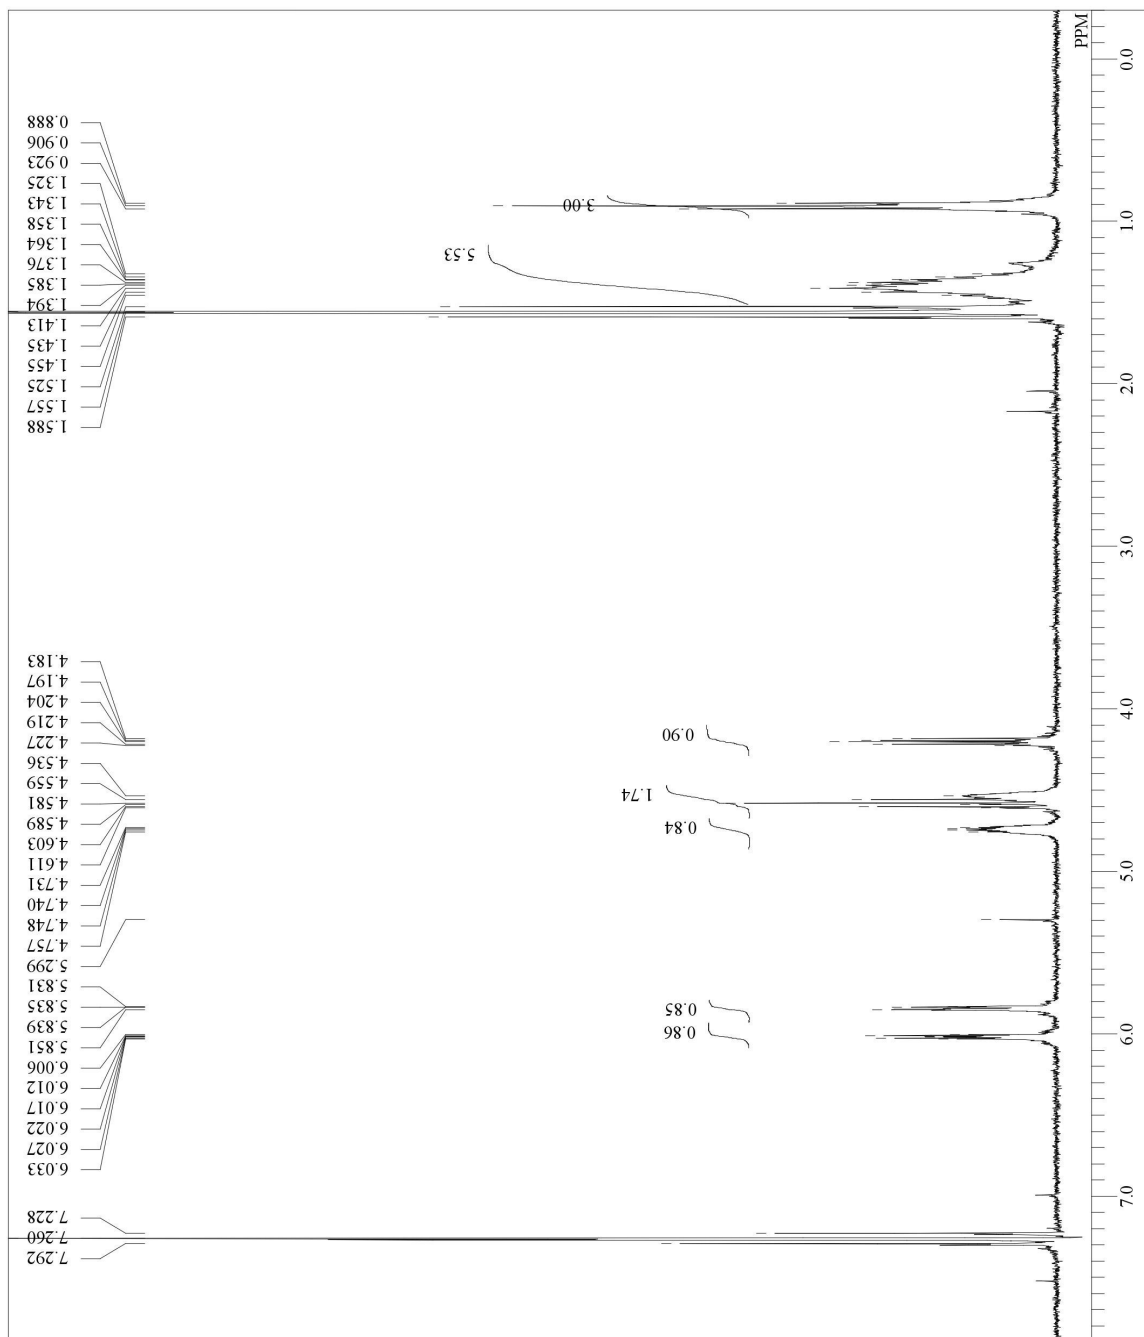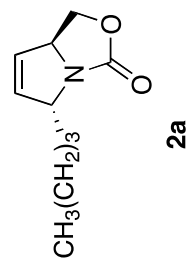



KEM\_1\_30\_1\_PRODUCT-T.als  
KEM\_1\_30\_1\_PRODUCT  
Thu Jul 03 14:03:27 2008

DFILE  
COMNT  
DATIM  
OBNUC  
EXMOD  
OBFREQ  
OBSET  
OBFIN  
POINT  
FREQU  
SCANS  
ACQTM  
PD  
PWI  
IRNUC  
CTEMP  
SLVNT  
EXREF  
BF  
RGAIN

395.75 MHz  
124.00 KHz  
10277.00 Hz  
16384  
7912.96 Hz  
8  
2.0705 sec  
4.9290 sec  
5.20 usec  
1H  
23.0 c  
CDCL3  
7.26 ppm  
0.24 Hz  
22

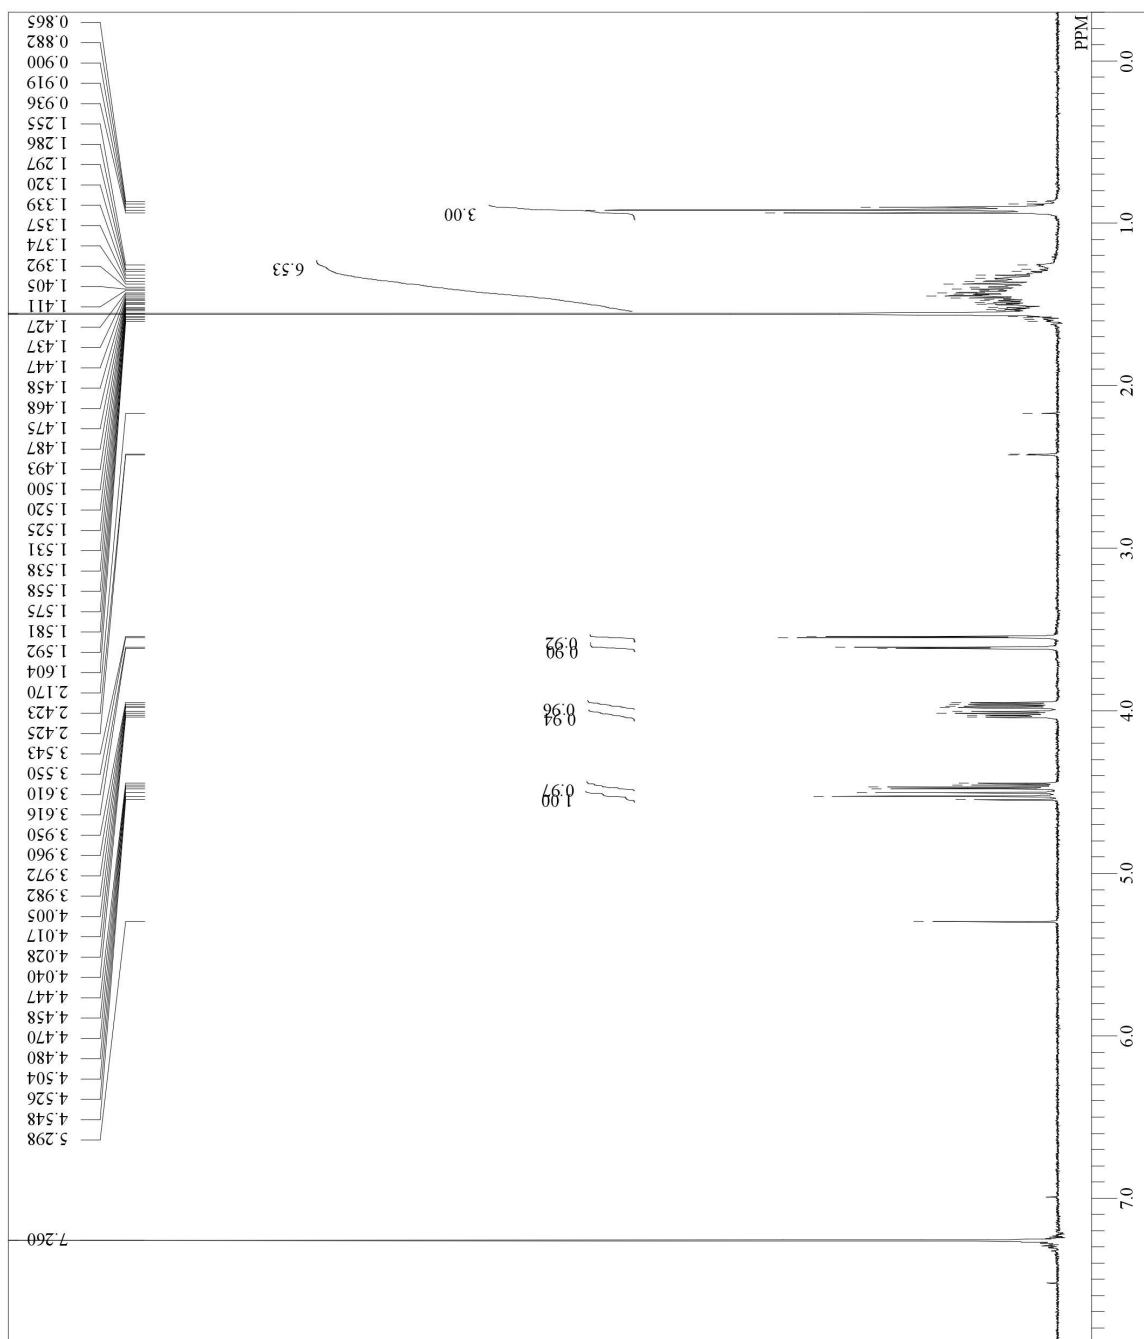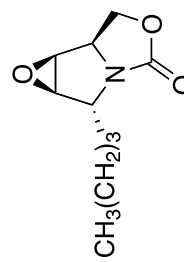

3a

KEM\_1\_33\_1\_PRODUCT-T.als  
 KEM\_1\_33\_1\_PRODUCT  
 Tue Jul 08 16:28:06 2008

1H  
 1H  
 NON  
 395.75 MHz  
 124.00 KHz  
 10277.00 Hz  
 16384  
 7912.96 Hz  
 8  
 2.0705 sec  
 4.9290 sec  
 5.20 usec  
 1H  
 22.8 c  
 CDCL3  
 7.26 ppm  
 0.24 Hz  
 24

DFILE  
 COMNT  
 DATIM  
 EXMOD  
 OBFRO  
 OBSET  
 OBFIN  
 POINT  
 FREQU  
 SCANS  
 ACQTM  
 PD  
 PW1  
 IRNUC  
 CTEMP  
 SLVNT  
 EXREF  
 BF  
 RGAIN

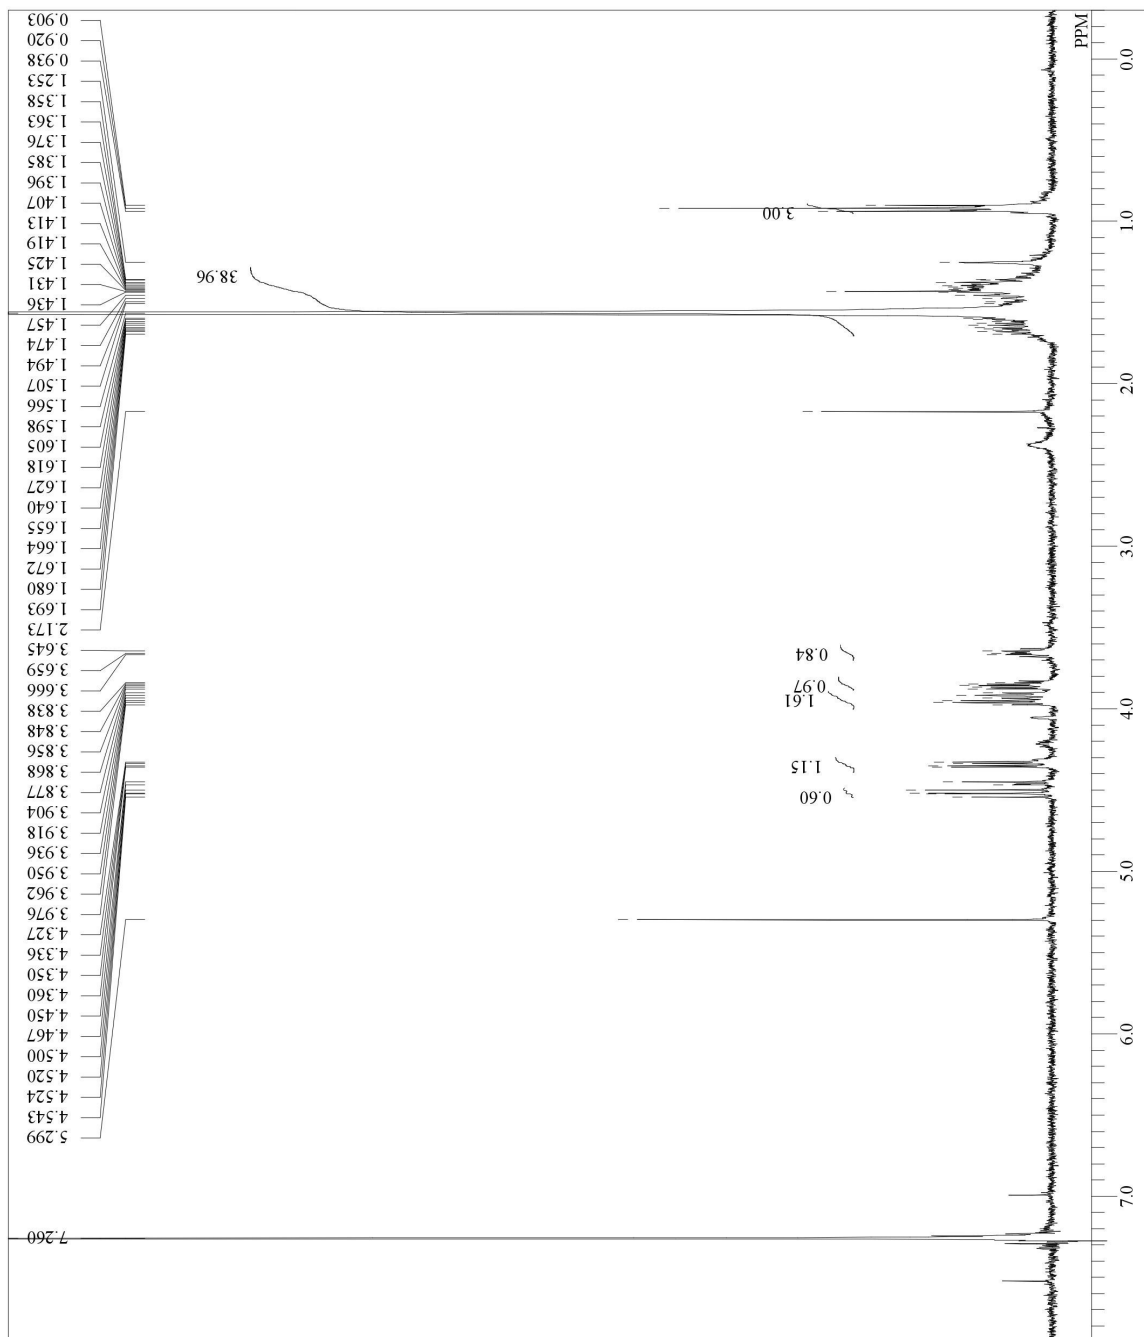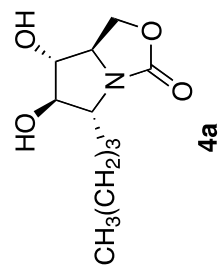

DFILE KEM\_1\_35\_2\_product-T.als  
 COMNT KEM\_1\_35\_2\_product  
 DATIM Wed Jul 09 21:36:15 2008  
 OBNUC 1H  
 EXMOD NON  
 OBFREQ 395.75 MHz  
 OBSET 124.00 KHz  
 OBFIN 10277.00 Hz  
 POINT 16384  
 FREQU 7912.96 Hz  
 SCANS 8  
 ACQTM 2.0705 sec  
 PD 4.9290 sec  
 PW1 5.20 usec  
 IRNUC 1H  
 CTEMP 22.4 c  
 SLVNT CD3OD  
 EXREF 3.30 ppm  
 BF 0.21 Hz  
 RGAIN 19

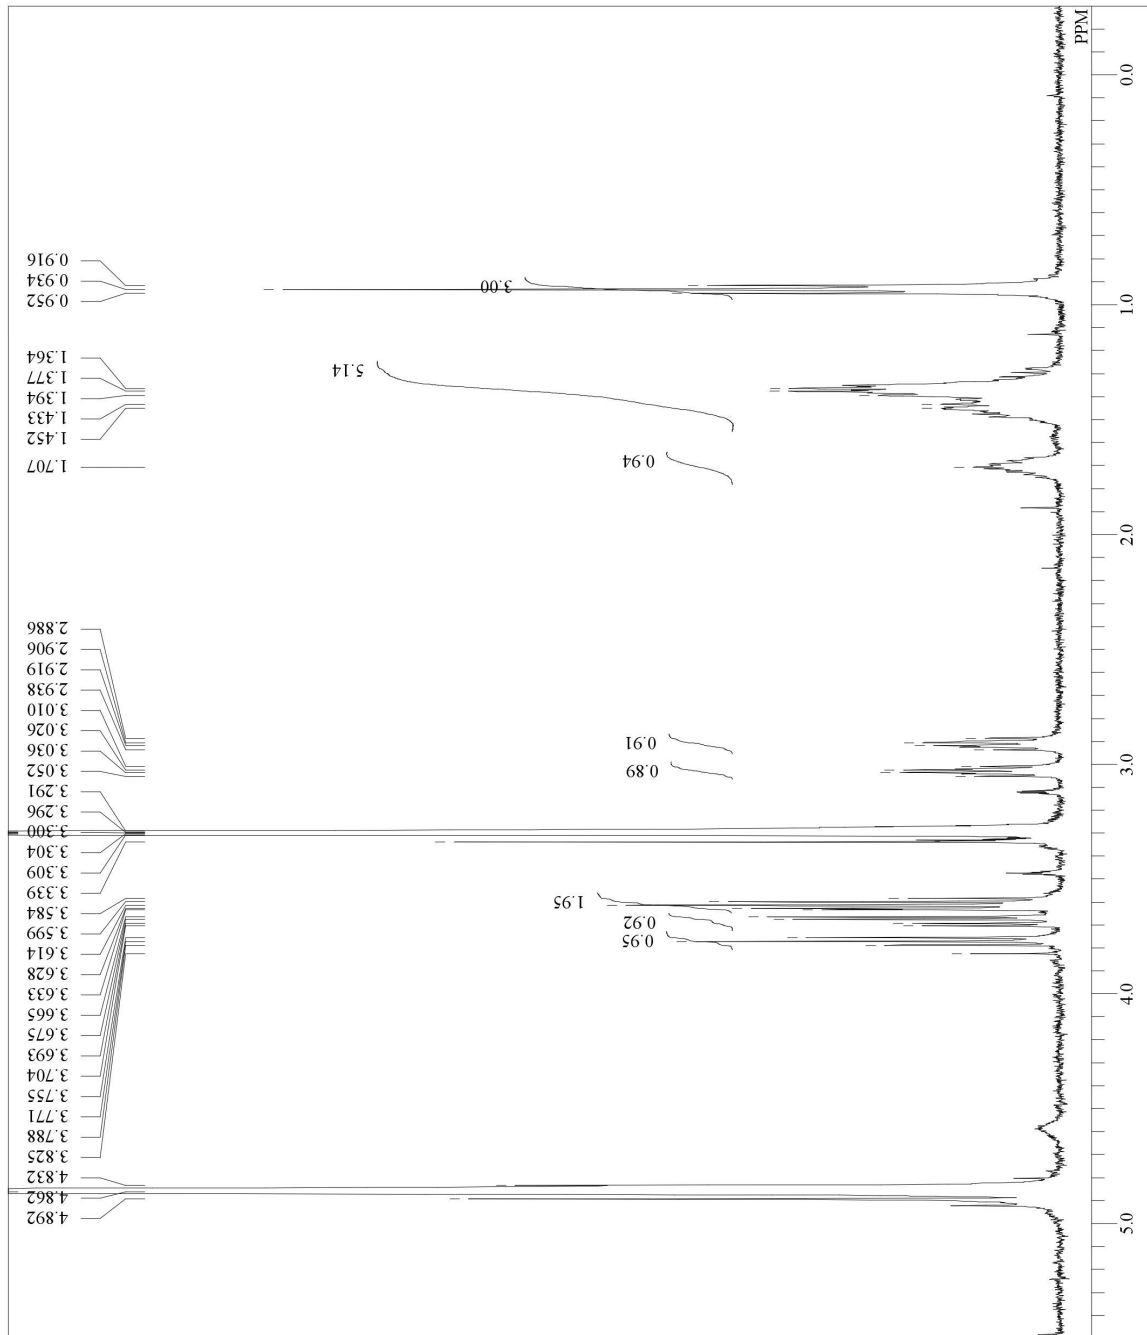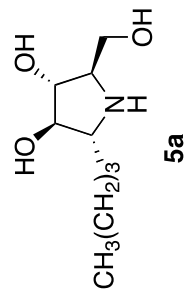

DFILE YAS01-22-01-did.als  
 COMNT YAS01-22-01  
 DATIM Mon Jun 04 18:07:42 2012  
 IH  
 EXMOD NON  
 OBFREQ 395.75 MHz  
 OBSET 124.00 KHz  
 OBFIN 10277.00 Hz  
 POINT 16384  
 FREQU 7912.96 Hz  
 SCANS 8  
 ACQTM 2.0705 sec  
 PD 4.9290 sec  
 PW1 5.50 usec  
 IRNUC 1H  
 CTEMP 20.2 c  
 SLVNT CDCL3  
 EXREF 0.00 ppm  
 BF 0.24 Hz  
 RGAIN 15

DFILE YAS01-22-01-did.als  
 COMNT YAS01-22-01  
 DATIM Mon Jun 04 18:07:42 2012  
 IH  
 EXMOD NON  
 OBFREQ 395.75 MHz  
 OBSET 124.00 KHz  
 OBFIN 10277.00 Hz  
 POINT 16384  
 FREQU 7912.96 Hz  
 SCANS 8  
 ACQTM 2.0705 sec  
 PD 4.9290 sec  
 PW1 5.50 usec  
 IRNUC 1H  
 CTEMP 20.2 c  
 SLVNT CDCL3  
 EXREF 0.00 ppm  
 BF 0.24 Hz  
 RGAIN 15

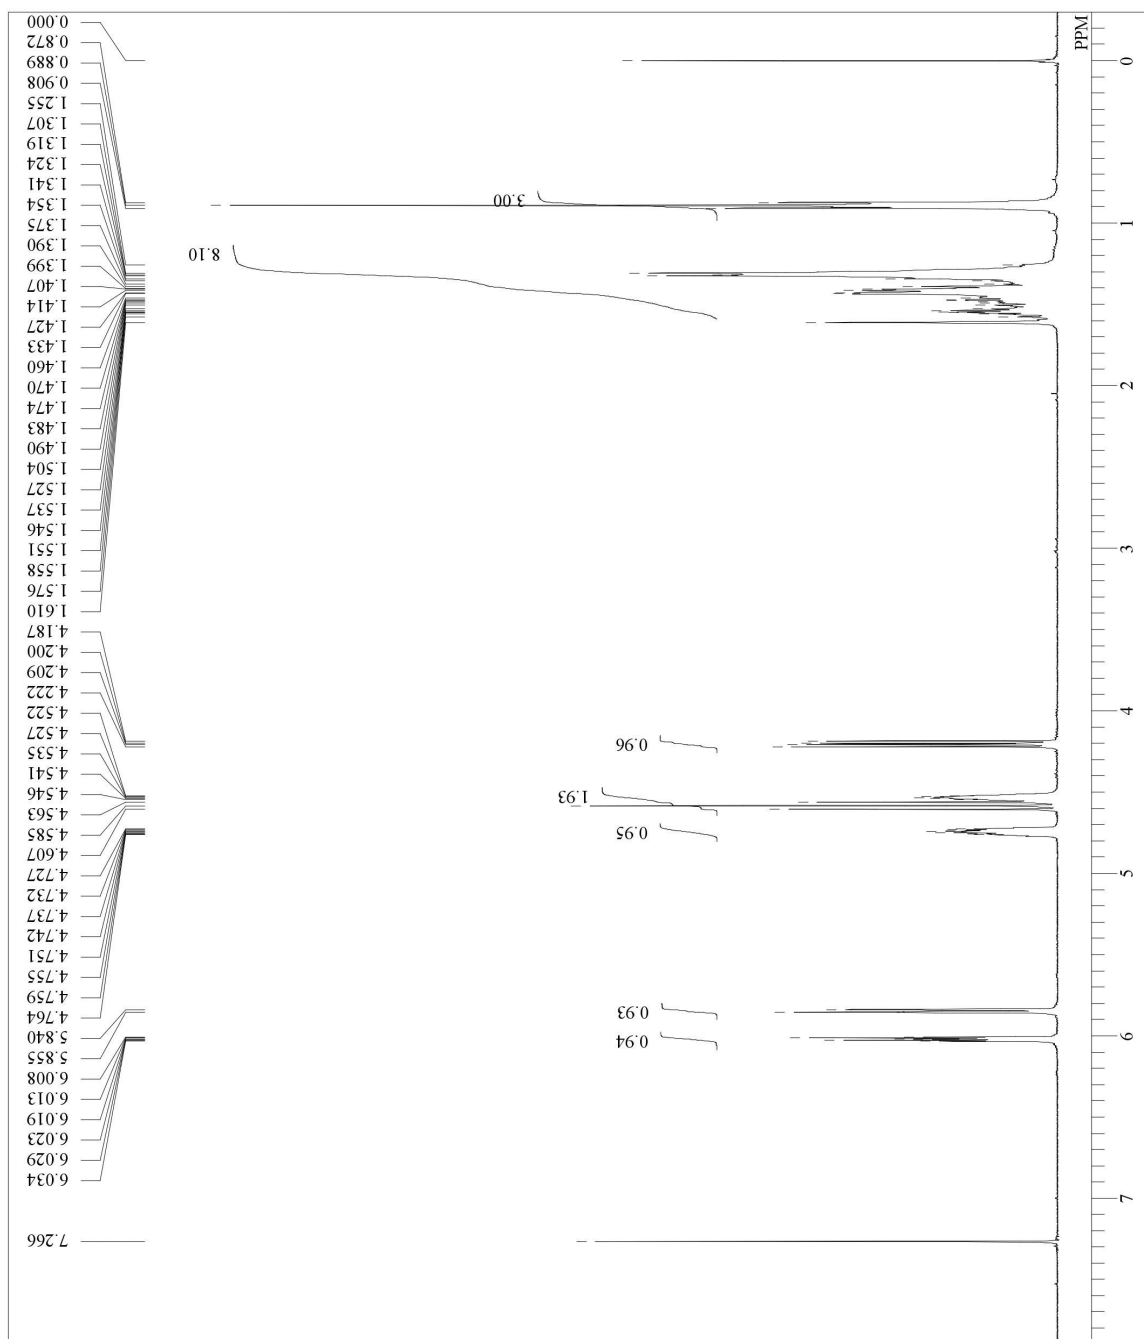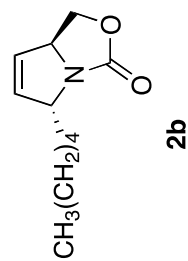

DFILE YAS01-24-01-did.als  
 COMNT YAS01-24-01  
 DATIM Fri Jun 08 11:33:48 2012  
 OBNUC 1H  
 EXMOD NON  
 OBFREQ 395.75 MHz  
 OBSSET 124.00 KHz  
 OBFIN 10277.00 Hz  
 POINT 16384  
 FREQU 7912.96 Hz  
 SCANS 8  
 ACQTM 2.0705 sec  
 PD 4.9290 sec  
 PW1 5.50 usec  
 IRNUC 1H  
 CTEMP 20.2 c  
 SLVNT CDCL3  
 EXREF 0.00 ppm  
 BF 0.12 Hz  
 RGAIN 20

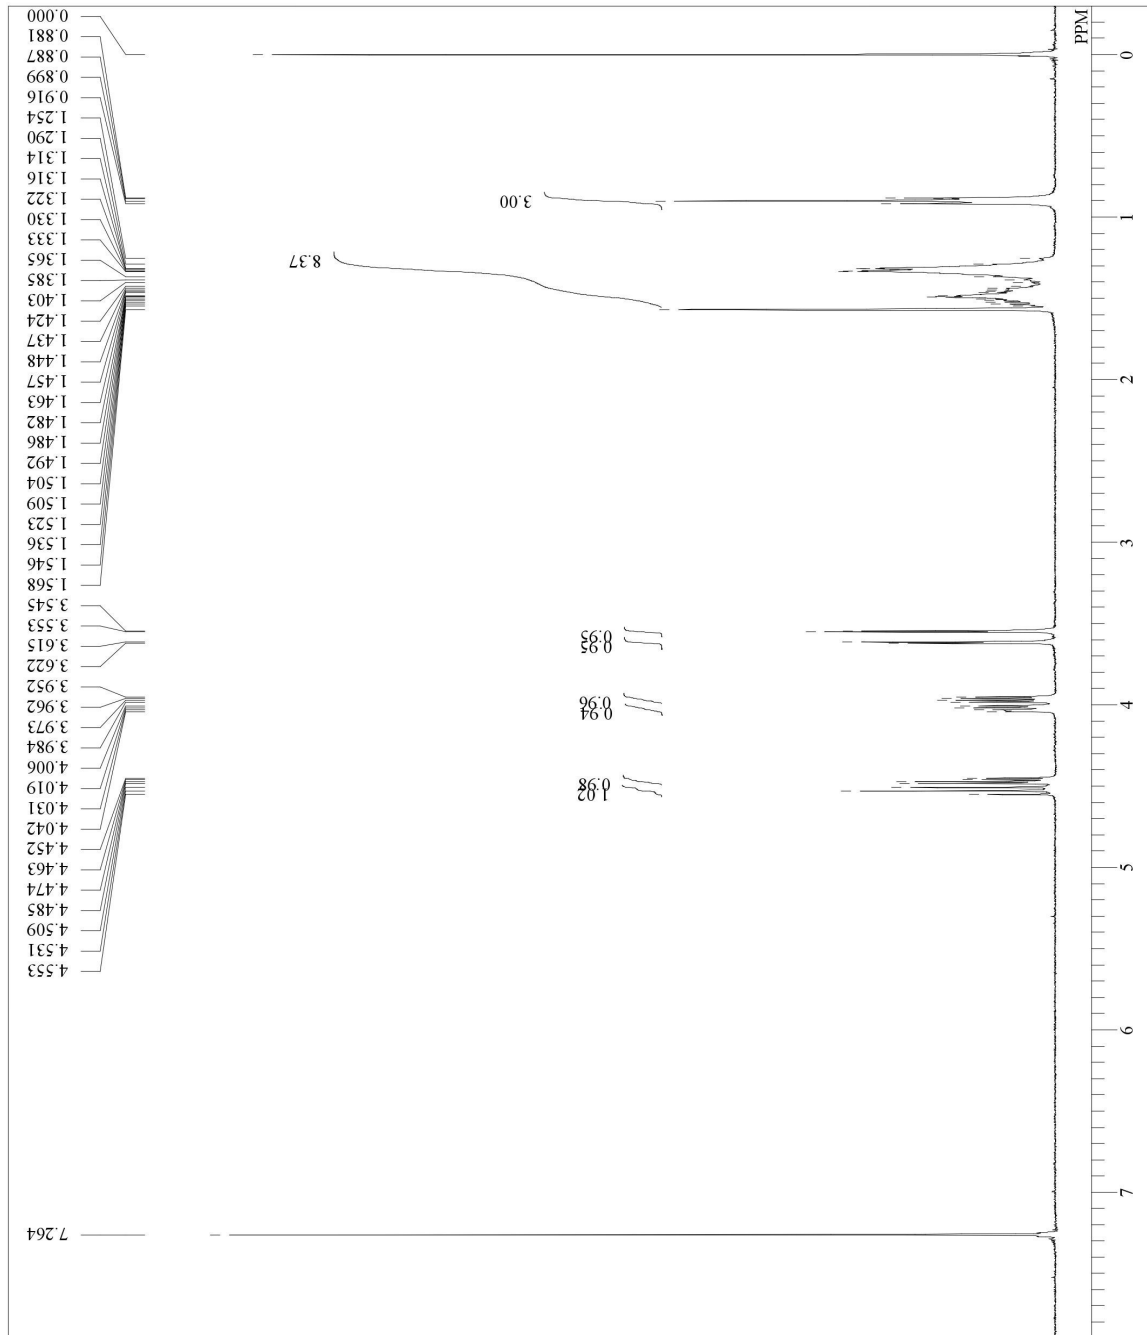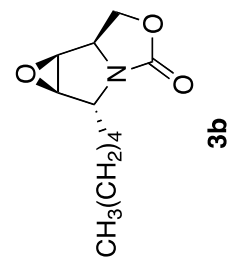

DFILE YAS01-26-dtd.als  
 COMNT YAS01-26  
 DATIM Tue Jun 12 13:08:09 2012  
 OBNUC 1H  
 EXMOD NON  
 OBFREQ 395.75 MHz  
 OBSET 124.00 KHz  
 OBFIN 10277.00 Hz  
 POINT 16384  
 FREQU 7912.96 Hz  
 SCANS 8  
 ACQTM 2.0705 sec  
 PD 4.9290 sec  
 PW1 5.50 usec  
 IRNUC 1H  
 CTEMP 21.3 c  
 SLVNT CDCL3  
 EXREF 0.00 ppm  
 BF 0.24 Hz  
 RGAIN 21

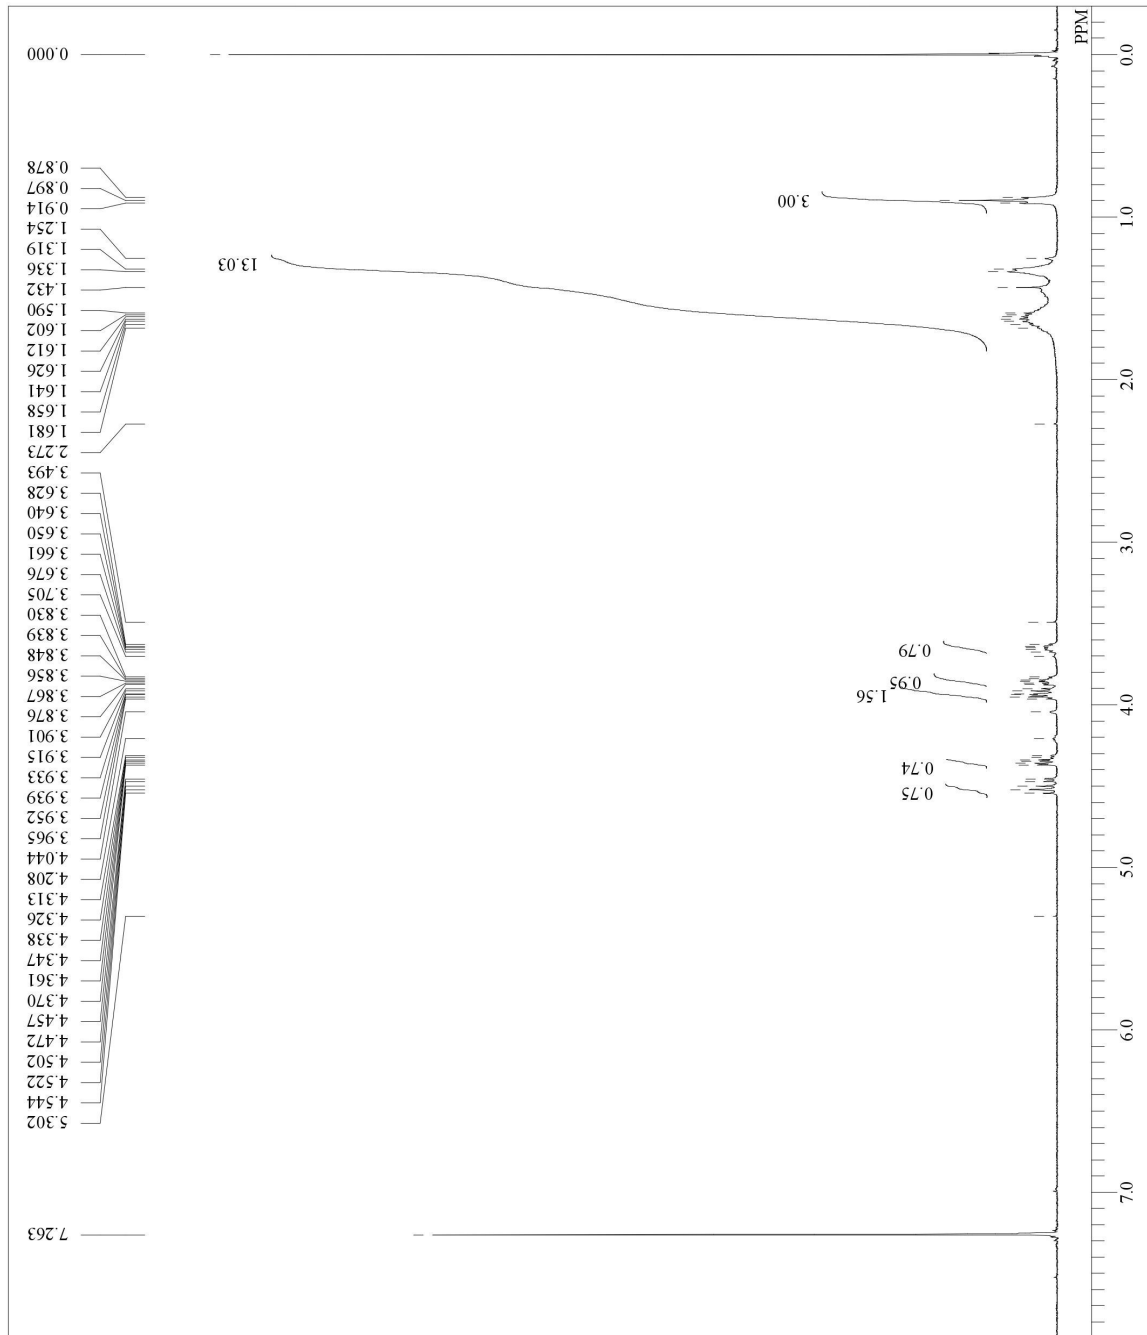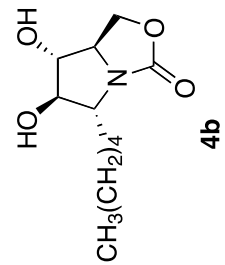

DFILE YAS01-27-02-did.als  
 COMNT YAS01-27-02  
 DATIM Wed Jun 20 10:52:11 2012  
 OBNUC 1H  
 EXMOD NON  
 OBFREQ 395.75 MHz  
 OBSETE 124.00 KHz  
 OBFIN 10277.00 Hz  
 POINT 16384  
 FREQU 7912.96 Hz  
 SCANS 8  
 ACQTM 2.0705 sec  
 PD 4.9290 sec  
 PW1 5.50 usec  
 IRNUC 1H  
 CTEMP 20.8 c  
 SLVNT CD3OD  
 EXREF 3.30 ppm  
 BF 0.24 Hz  
 RGAIN 16

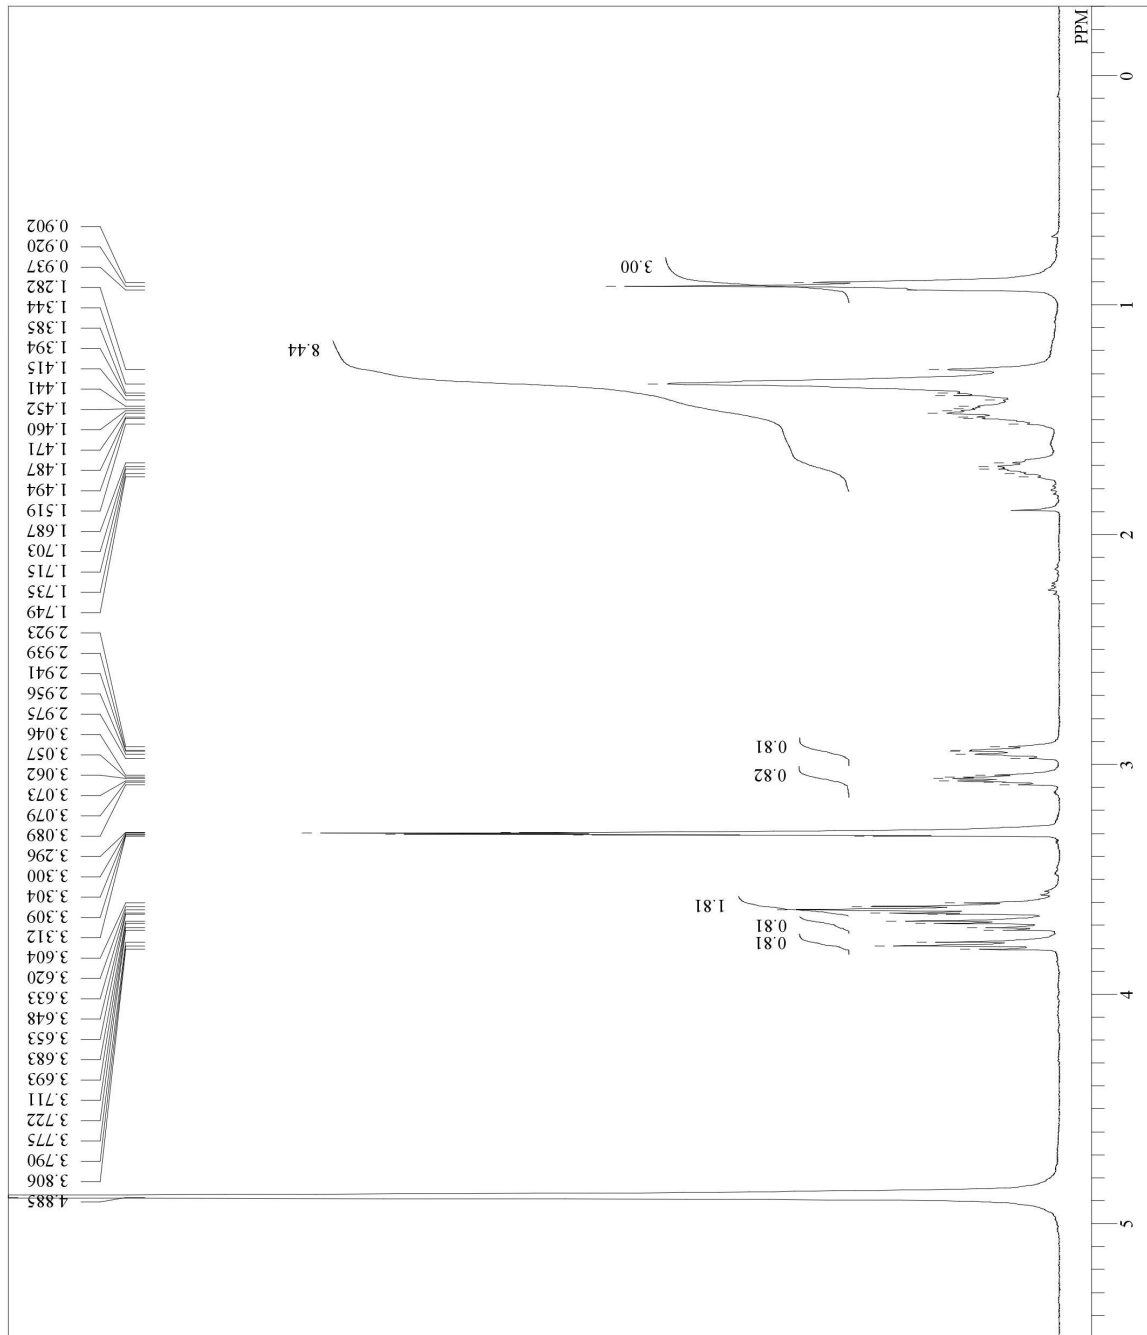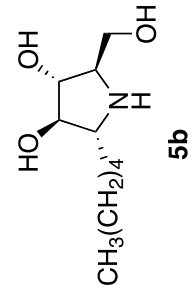

SAK\_1-37 did.als  
 COMNT  
 DATIM Fri Jun 01 17:35:13 2012  
 OBNUC 1H  
 EXMOD NON  
 OBFRQ 395.75 MHz  
 OBSET 124.00 KHz  
 OBFN 10277.00 Hz  
 POINT 16384  
 FREQU 7912.96 Hz  
 SCANS 8  
 ACQTM 2.0705 sec  
 PD 4.9290 sec  
 PW1 5.50 usec  
 IRNUC 1H  
 CTEMP 20.2 c  
 SLVNT CDCL3  
 EXREF 0.00 ppm  
 BF 0.24 Hz  
 RGAIN 21

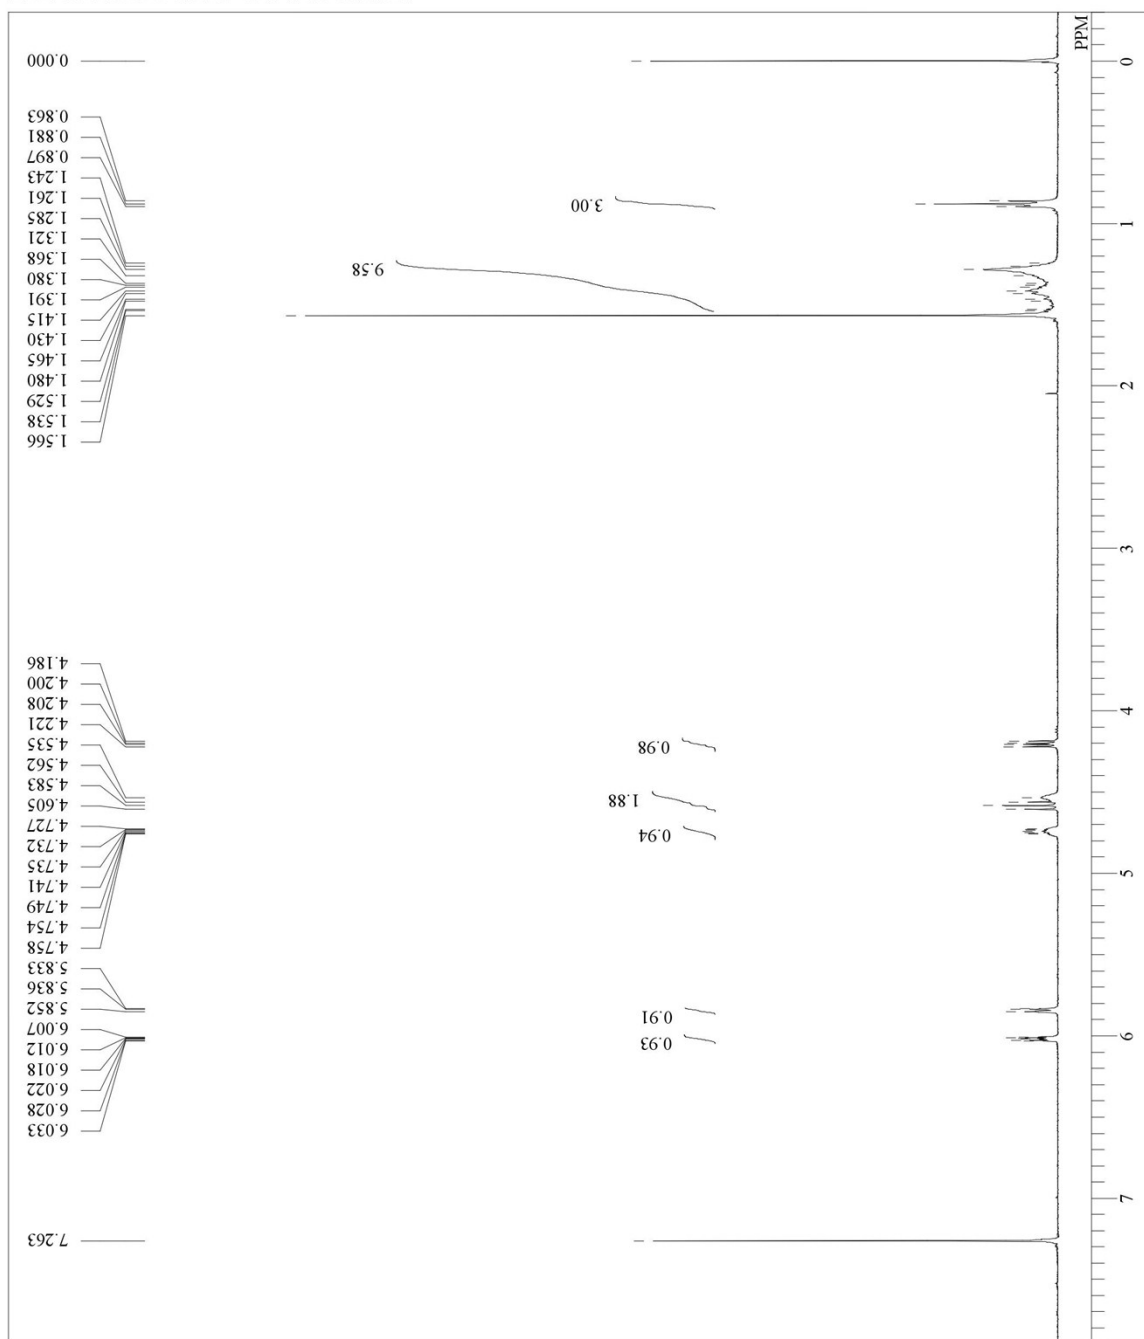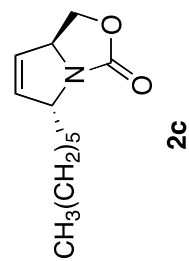



DFILE SAK 1-40-02.als  
 COMNT SAK 1-40-02  
 DATIM Fri Jun 08 11:11:46 2012  
 OBNUC 1H  
 EXMOD NON  
 OBFREQ 395.75 MHz  
 OBSET 124.00 KHz  
 OBFIN 10277.00 Hz  
 POINT 16384  
 FREQU 7912.96 Hz  
 SCANS 8  
 ACQIM 2.0705 sec  
 PD 4.9290 sec  
 PW1 5.50 usec  
 IRNUC 1H  
 CTEMP 20.5 c  
 CDCL3  
 EXREF 0.00 ppm  
 BF 0.12 Hz  
 RGAIN 17

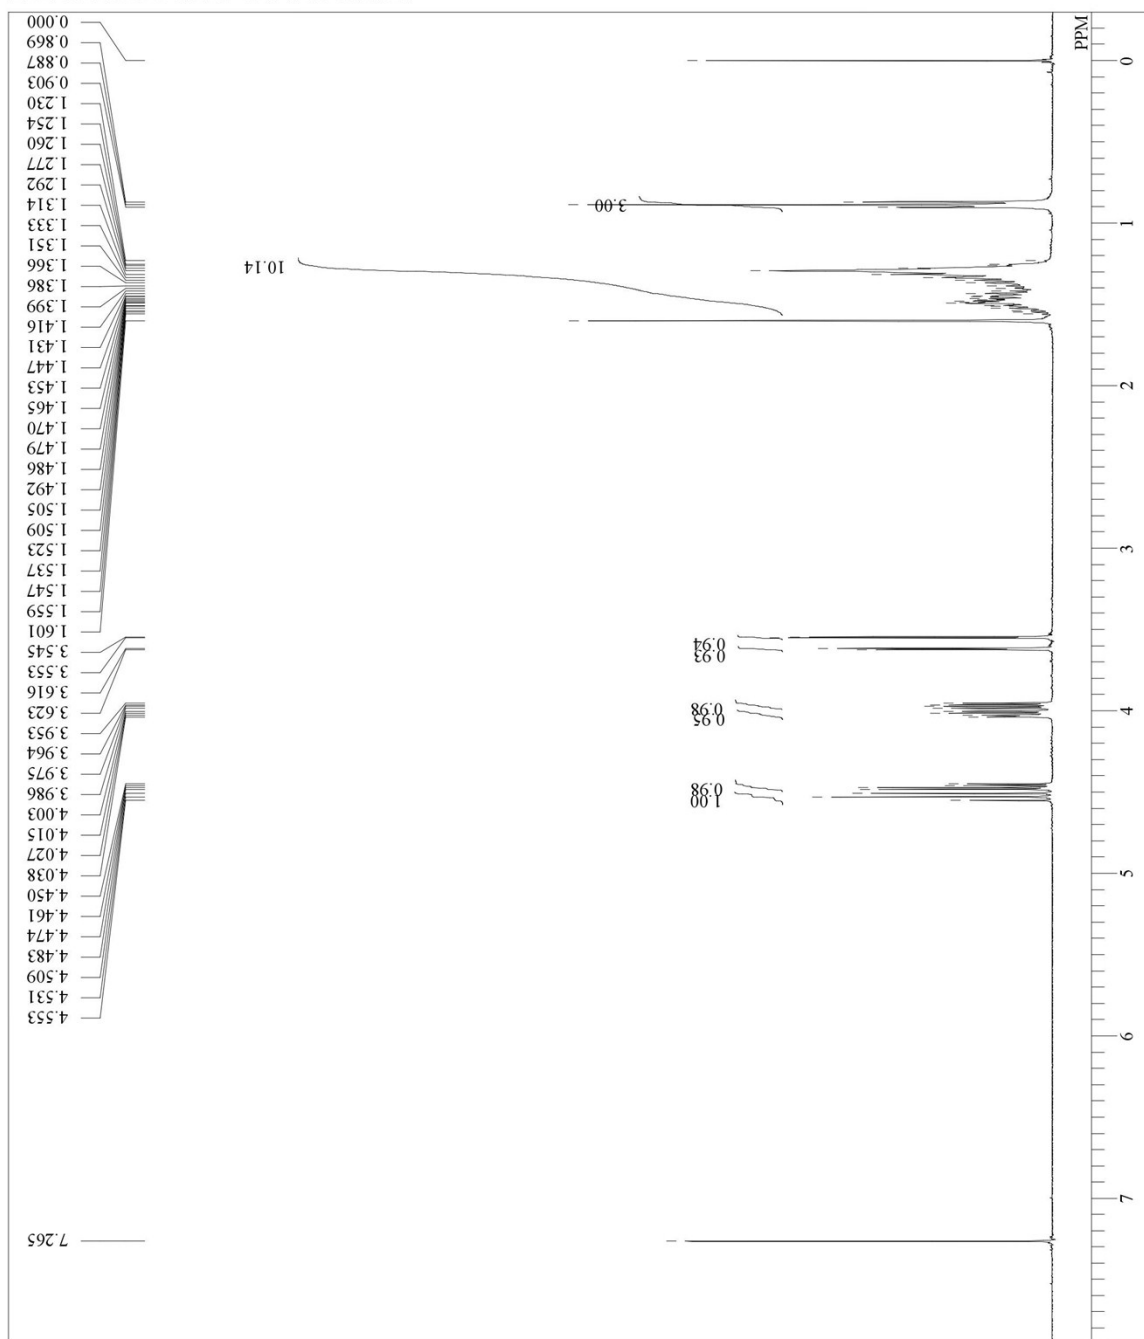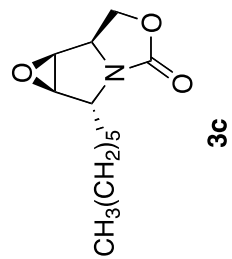

DFILE SAK 2-1-01.als  
 COMNT SAK 2-1-01  
 DATIM Tue Jun 12 11:34:55 2012  
 OBNUC 1H  
 EXMOD NON  
 OBFREQ 395.75 MHz  
 OBSSET 124.00 KHz  
 OBFIN 10277.00 Hz  
 POINT 16384  
 FREQU 7912.96 Hz  
 SCANS 8  
 ACQTM 2.0705 sec  
 PD 4.9290 sec  
 PW1 5.50 usec  
 IRNUC 1H  
 CTEMP 20.5 c  
 CDCL3 0.00 ppm  
 EXREF 0.24 Hz  
 BF 21  
 RGAIN

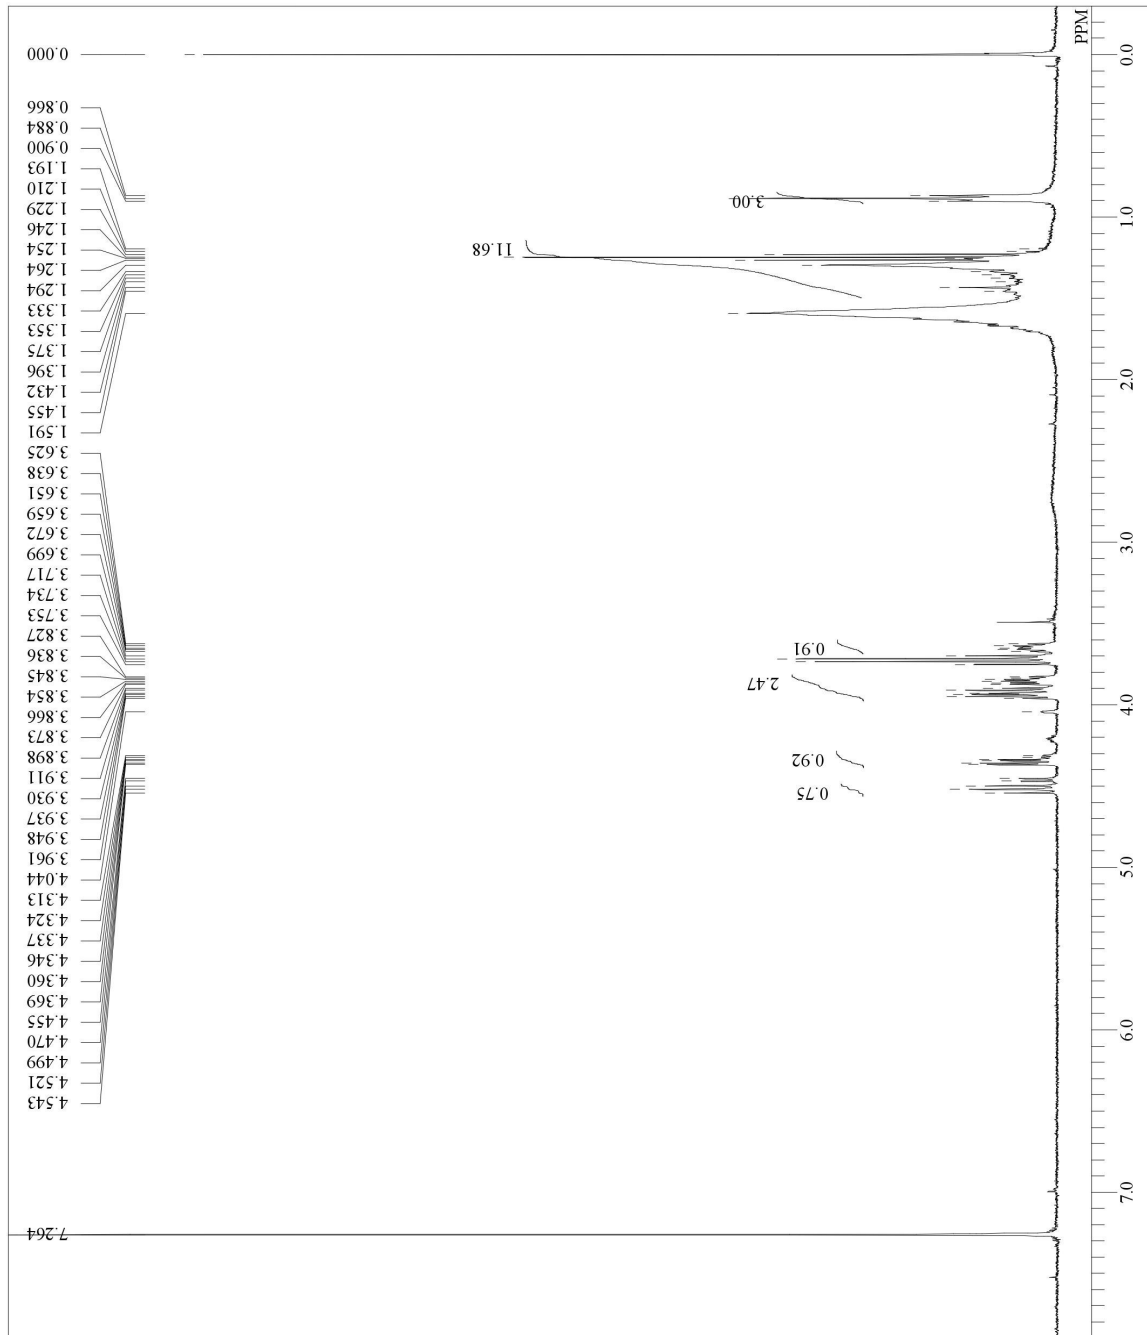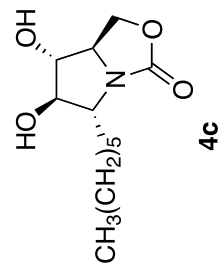

DFILE SAK-2-3-02 did.als  
 COMNT SAK-2-3-02  
 DATIM Fri Jun 15 14:01:05 2012  
 OBNUC 1H  
 EXMOD NON  
 OBFREQ 395.75 MHz  
 OBSETE 124.00 KHz  
 OBFIN 10277.00 Hz  
 POINT 16384  
 FREQU 7912.96 Hz  
 SCANS 8  
 ACQIM 2.0705 sec  
 PD 4.9290 sec  
 PW1 5.50 usec  
 IRNUC 1H  
 CTEMP 21.3 c  
 SLVNT CD3OD  
 EXREF 3.30 ppm  
 BF 0.42 Hz  
 RGAIN 15

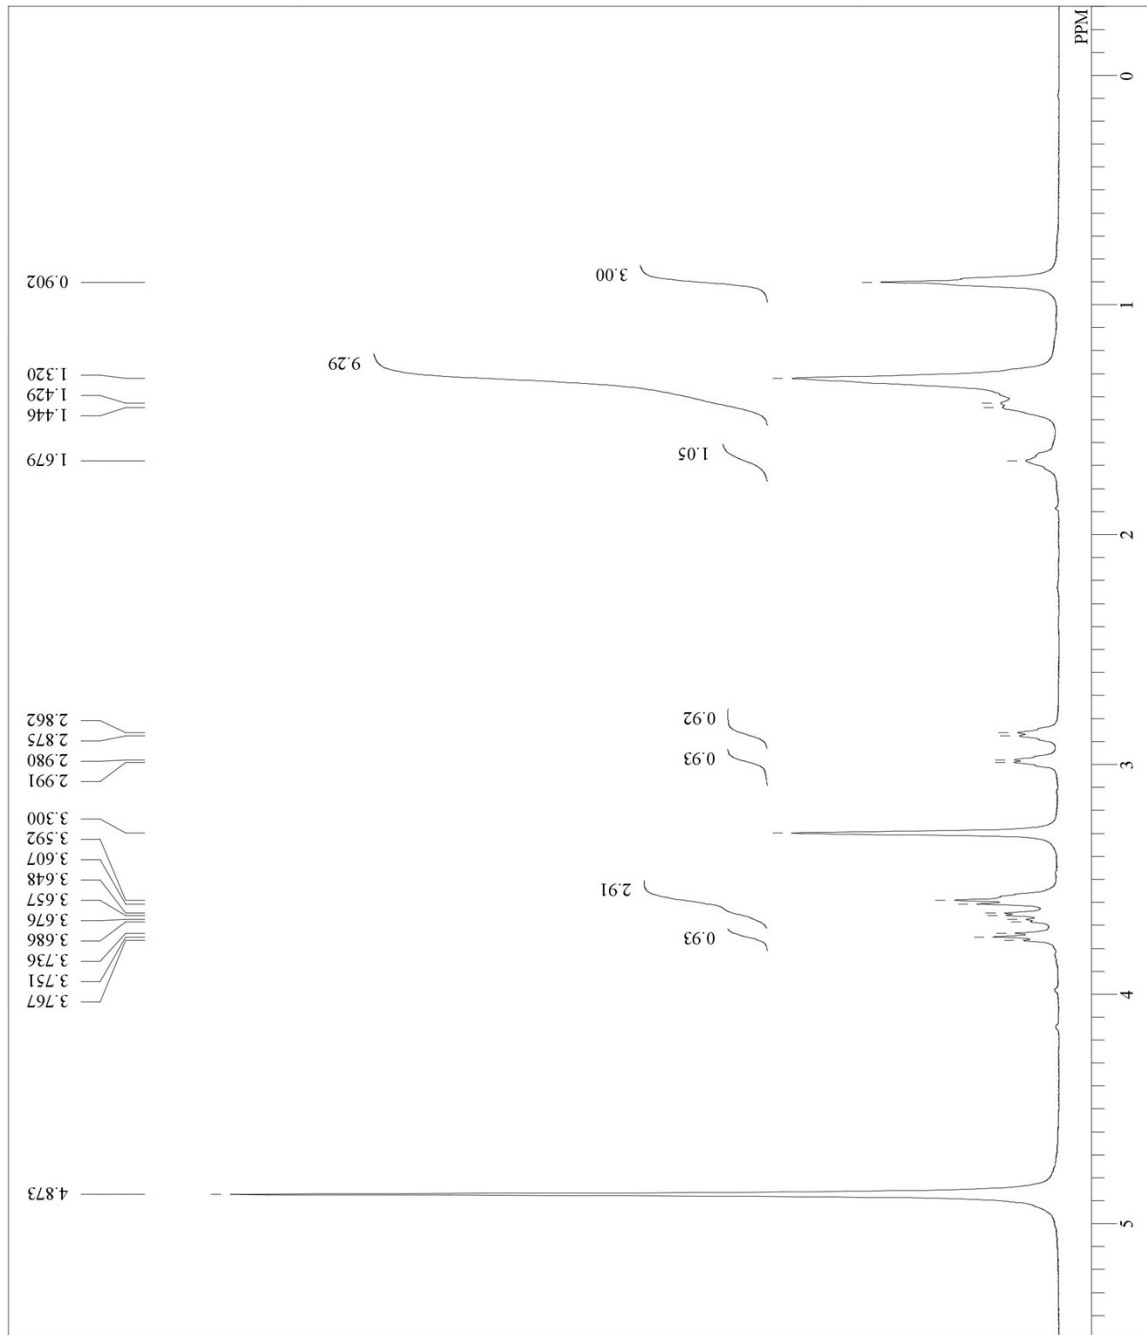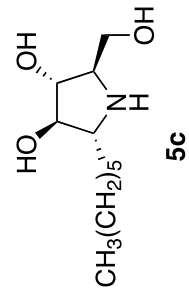

DFILE YAS01-30-1.als  
 COMNT YAS01-30-1  
 DATIM Tue Jul 10 18:10:10 2012  
 OBNUC 1H  
 EXMOD NON  
 OBFREQ 395.75 MHz  
 OBSET 124.00 KHz  
 OBFIN 10277.00 Hz  
 POINT 16384  
 FREQU 7912.96 Hz  
 SCANS 8  
 ACQTM 2.0705 sec  
 PD 4.9290 sec  
 PW1 5.50 usec  
 IRNUC 1H  
 CTEMP 20.9 c  
 CDCL3  
 EXREF 0.00 ppm  
 BF 0.24 Hz  
 RGAIN 15

DFILE YAS01-30-1.als  
 COMNT YAS01-30-1  
 DATIM Tue Jul 10 18:10:10 2012  
 OBNUC 1H  
 EXMOD NON  
 OBFREQ 395.75 MHz  
 OBSET 124.00 KHz  
 OBFIN 10277.00 Hz  
 POINT 16384  
 FREQU 7912.96 Hz  
 SCANS 8  
 ACQTM 2.0705 sec  
 PD 4.9290 sec  
 PW1 5.50 usec  
 IRNUC 1H  
 CTEMP 20.9 c  
 CDCL3  
 EXREF 0.00 ppm  
 BF 0.24 Hz  
 RGAIN 15

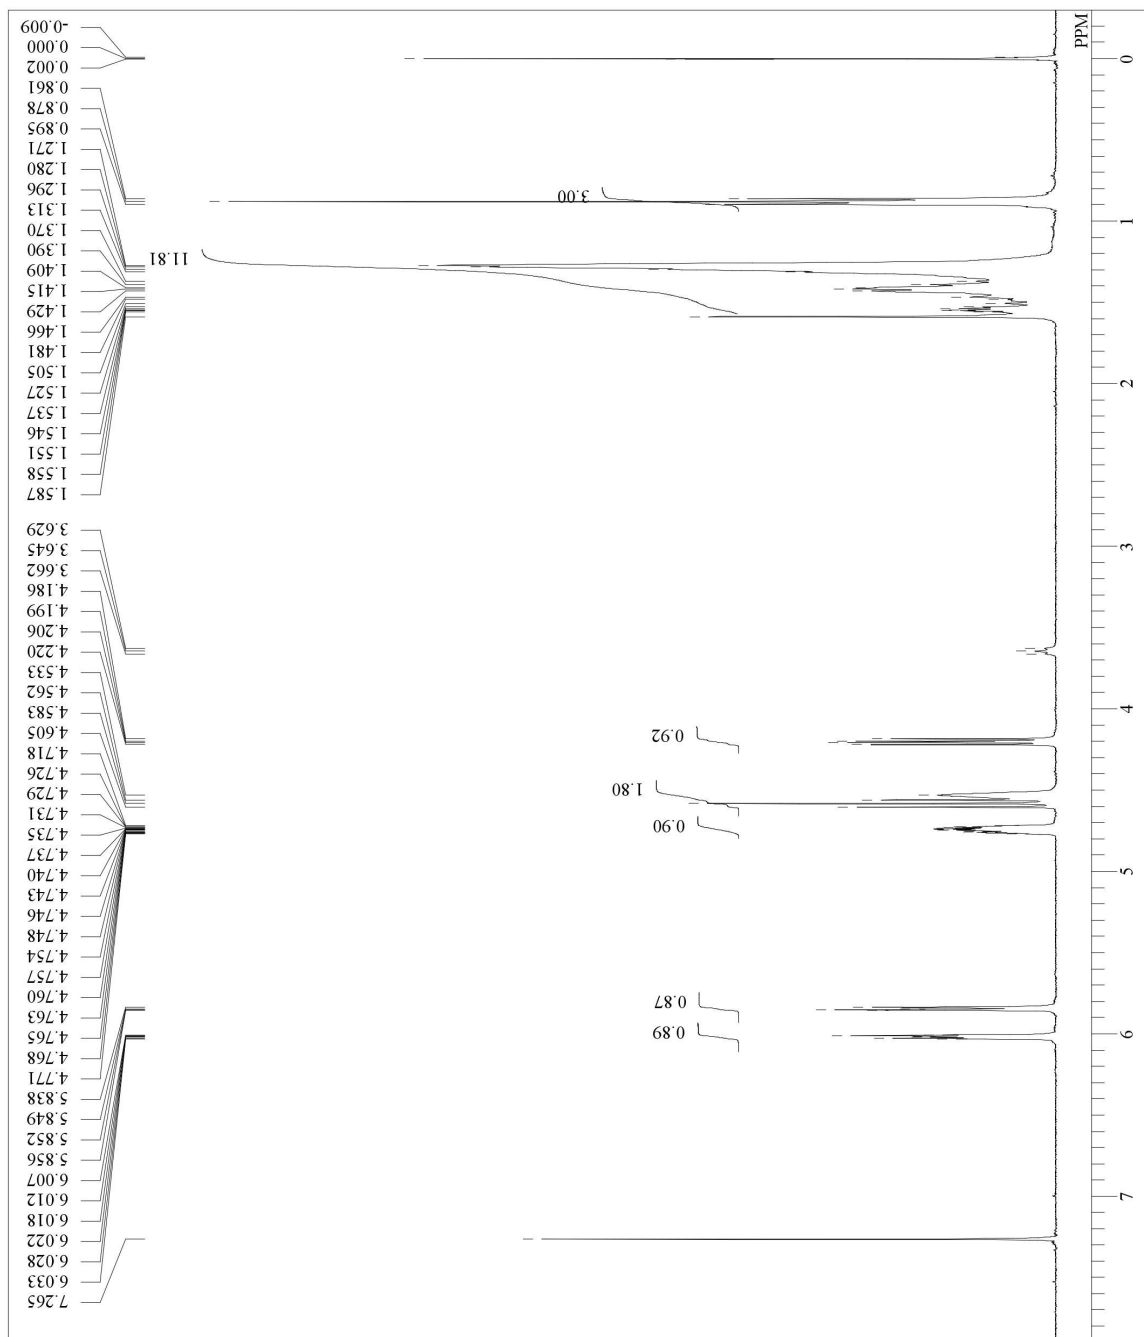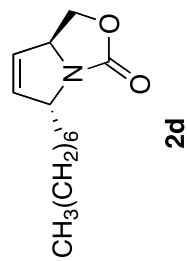

DFILE YAS01-32.als  
 COMNT YAS01-32  
 DATIM Fri Jul 20 18:29:32 2012  
 OBNUC 1H  
 EXMOD NON  
 OBFRQ 399.65 MHz  
 OBSET 124.00 kHz  
 OBFN 10500.00 Hz  
 POINT 16384  
 FREQU 7992.01 Hz  
 SCANS 8  
 ACQTM 2.0500 sec  
 PD 4.9500 sec  
 PW1 5.80 usec  
 IRNUC 1H  
 CTEMP 23.5 c  
 SLVNT CDCL3  
 EXREF 0.00 ppm  
 BF 4.20 Hz  
 RGAIN 17

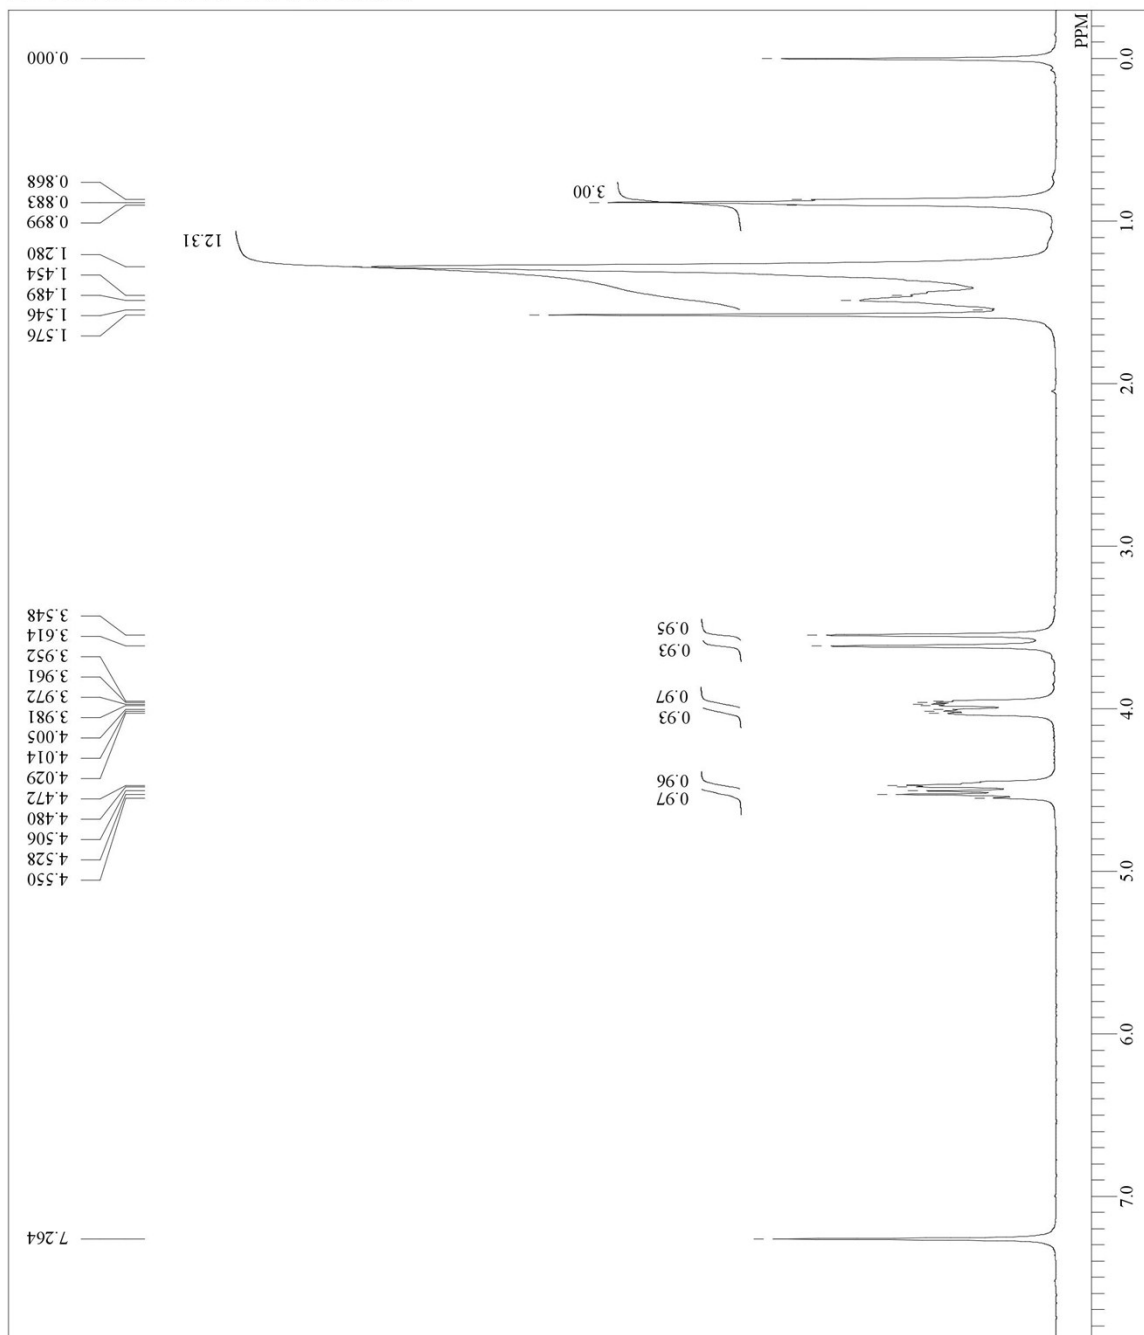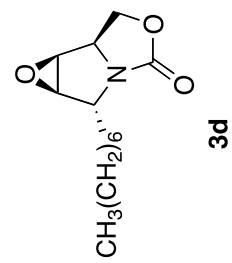

DFILE YAS01-40-dtd.als  
 COMNT YAS01-40  
 DATIM Wed Aug 01 17:08:36 2012  
 OBNUC 1H  
 EXMOD NON  
 OBFREQ 395.75 MHz  
 OBSET 124.00 KHz  
 OBFIN 10277.00 Hz  
 POINT 16384  
 FREQU 7912.96 Hz  
 SCANS 8  
 ACQTM 2.0705 sec  
 PD 4.9290 sec  
 PW1 5.50 usec  
 IRNUC 1H  
 CTEMP 21.8 c  
 SLVNT CDCL3  
 EXREF 0.00 ppm  
 BF 0.24 Hz  
 RGAIN 19

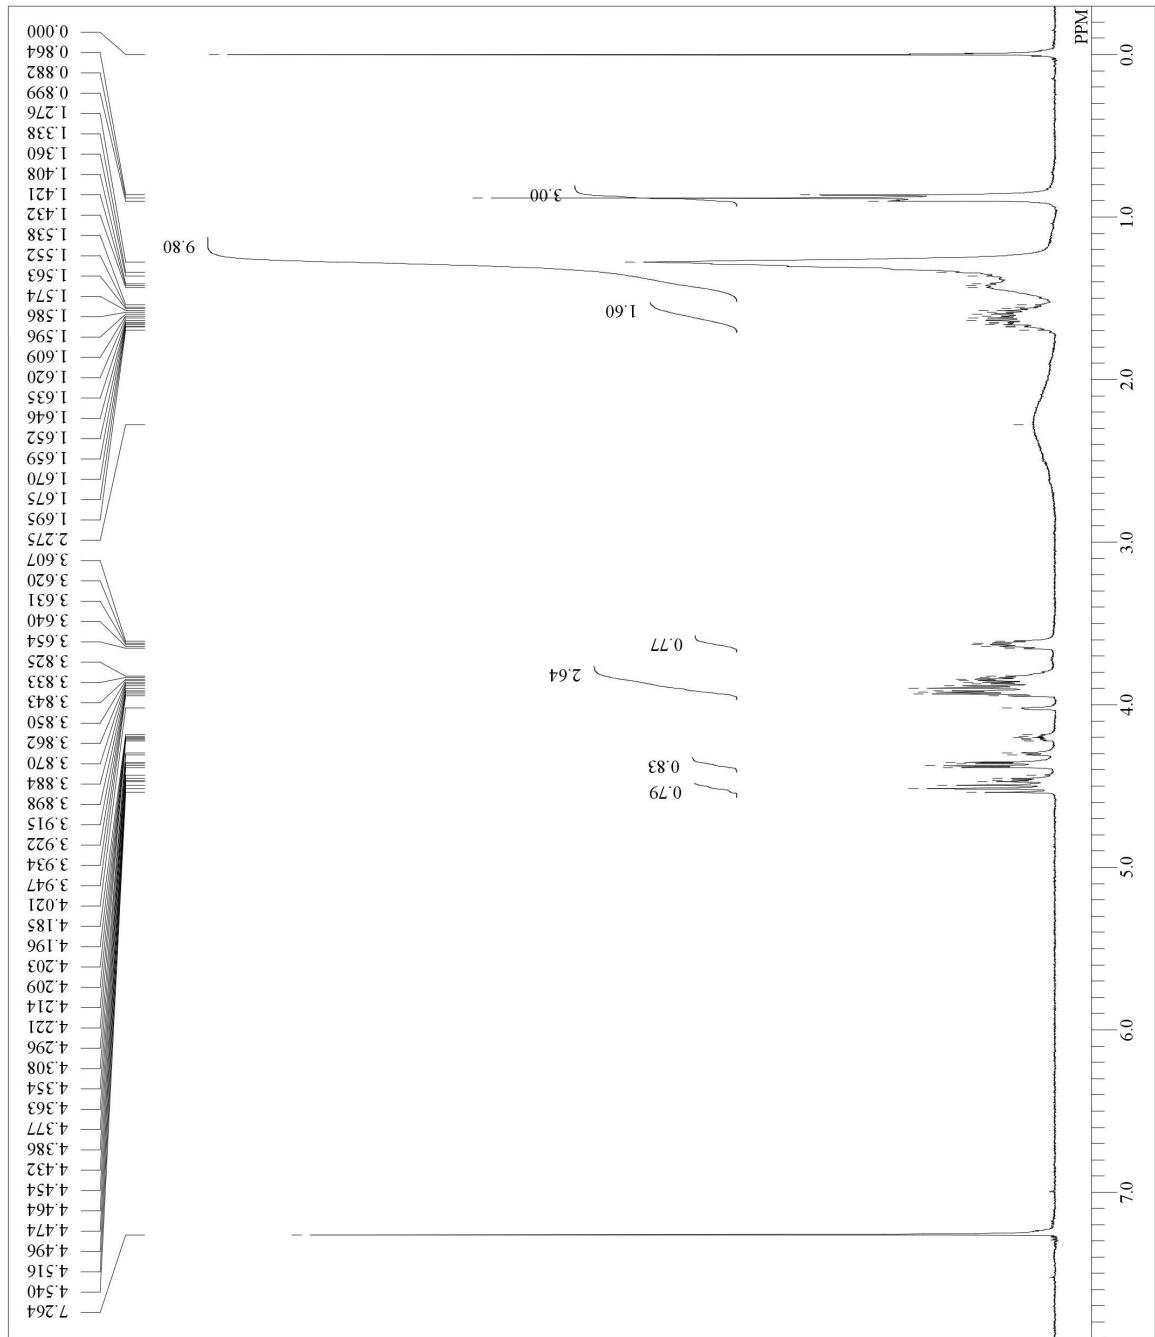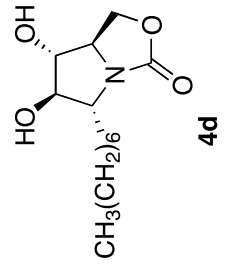

DFILE YAS02-02-dtd.als  
 COMNT YAS02-02  
 DATIM Tue Aug 28 18:43:21 2012  
 OBNUC 1H  
 EXMOD NON  
 OBFRQ 395.75 MHz  
 OBSET 124.00 KHz  
 OBFIN 10277.00 Hz  
 POINT 16384  
 FREQU 7912.96 Hz  
 SCANS 8  
 ACQIM 2.0705 sec  
 PD 4.9290 sec  
 PW1 5.50 usec  
 IRNUC 1H  
 CTEMP 21.7 c  
 CD3OD  
 SLVNT 3.30 ppm  
 EXREF 0.24 Hz  
 BF 18  
 RGAIN

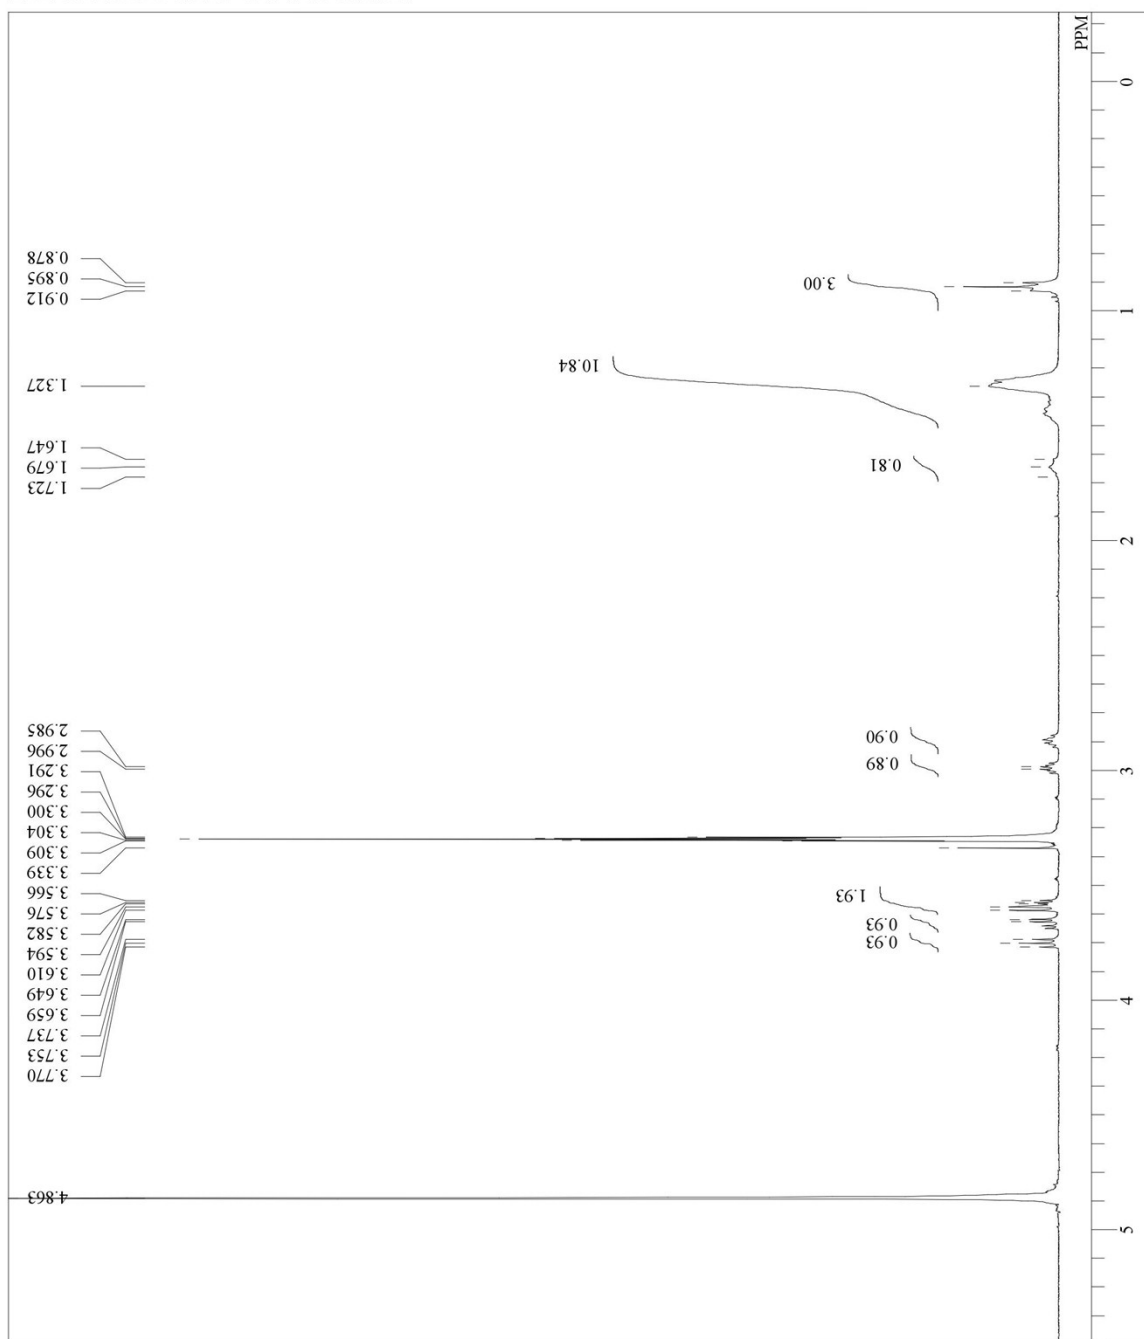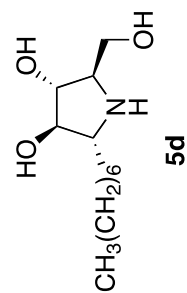

KEM\_1\_31\_1\_PRODUCT-T-did.als  
 KEM\_1\_31\_1\_PRODUCT  
 Thu Jul 03 22:19:26 2008

DFILE  
 COMNT  
 DATIM  
 OBNUC  
 EXMOD  
 OBFREQ  
 OBSET  
 OBFIN  
 POINT  
 FREQU  
 SCANS  
 ACQTM  
 PD  
 PW1  
 IRNUC  
 CTEMP  
 SLVNT  
 EXREF  
 BF  
 RGAIN

1H  
 NON  
 399.65 MHz  
 124.00 KHz  
 10500.00 Hz  
 16384  
 7992.01 Hz  
 8  
 2.0500 sec  
 4.9500 sec  
 5.40 usec  
 1H  
 24.9 c  
 CDCL3  
 7.26 ppm  
 0.24 Hz  
 21

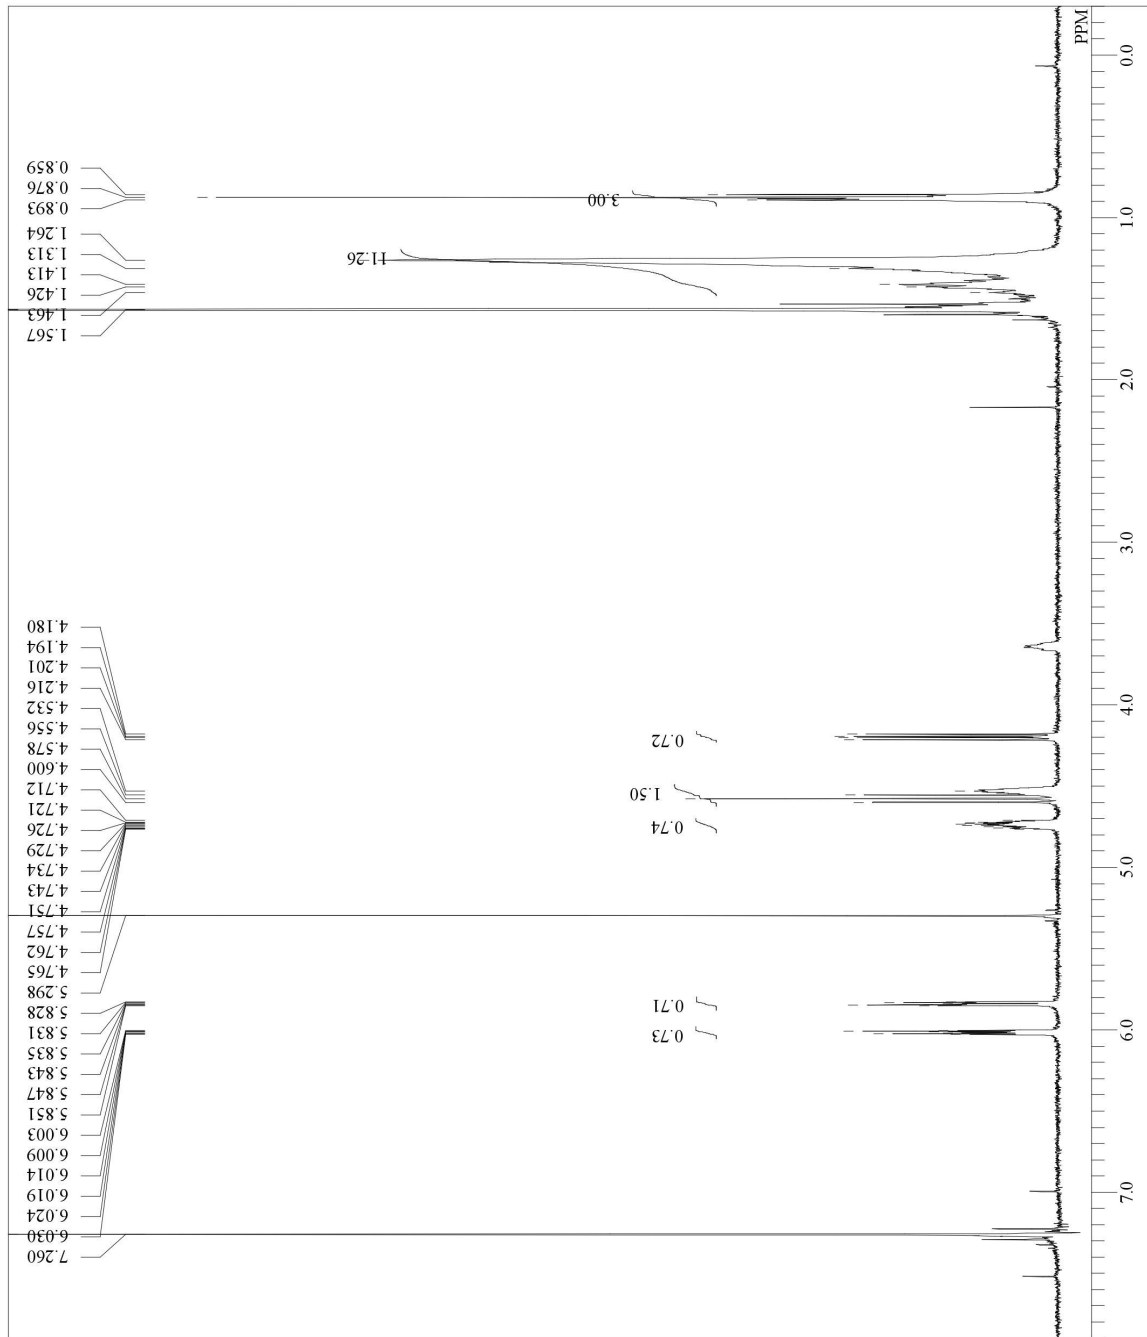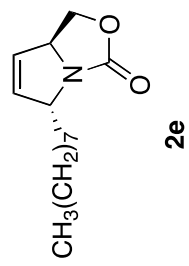



KEM\_1\_32\_1\_PRODUCT-T-did.als  
 KEM1-32-1 PRODUCT  
 Fri Jul 04 21:24:37 2008

DFILE  
 COMNT  
 DATIM  
 OBNUC  
 EXMOD  
 OBFREQ  
 OBSET  
 OBFIN  
 POINT  
 FREQU  
 SCANS  
 ACQTM  
 PD  
 PW1  
 IRNUC  
 CTEMP  
 SLVNT  
 EXREF  
 BF  
 RGAIN

395.75 MHz  
 124.00 KHz  
 10277.00 Hz  
 16384  
 7912.96 Hz  
 8  
 2.0705 sec  
 4.9290 sec  
 5.20 usec  
 1H  
 22.5 c  
 CDCL3  
 7.26 ppm  
 0.24 Hz  
 25

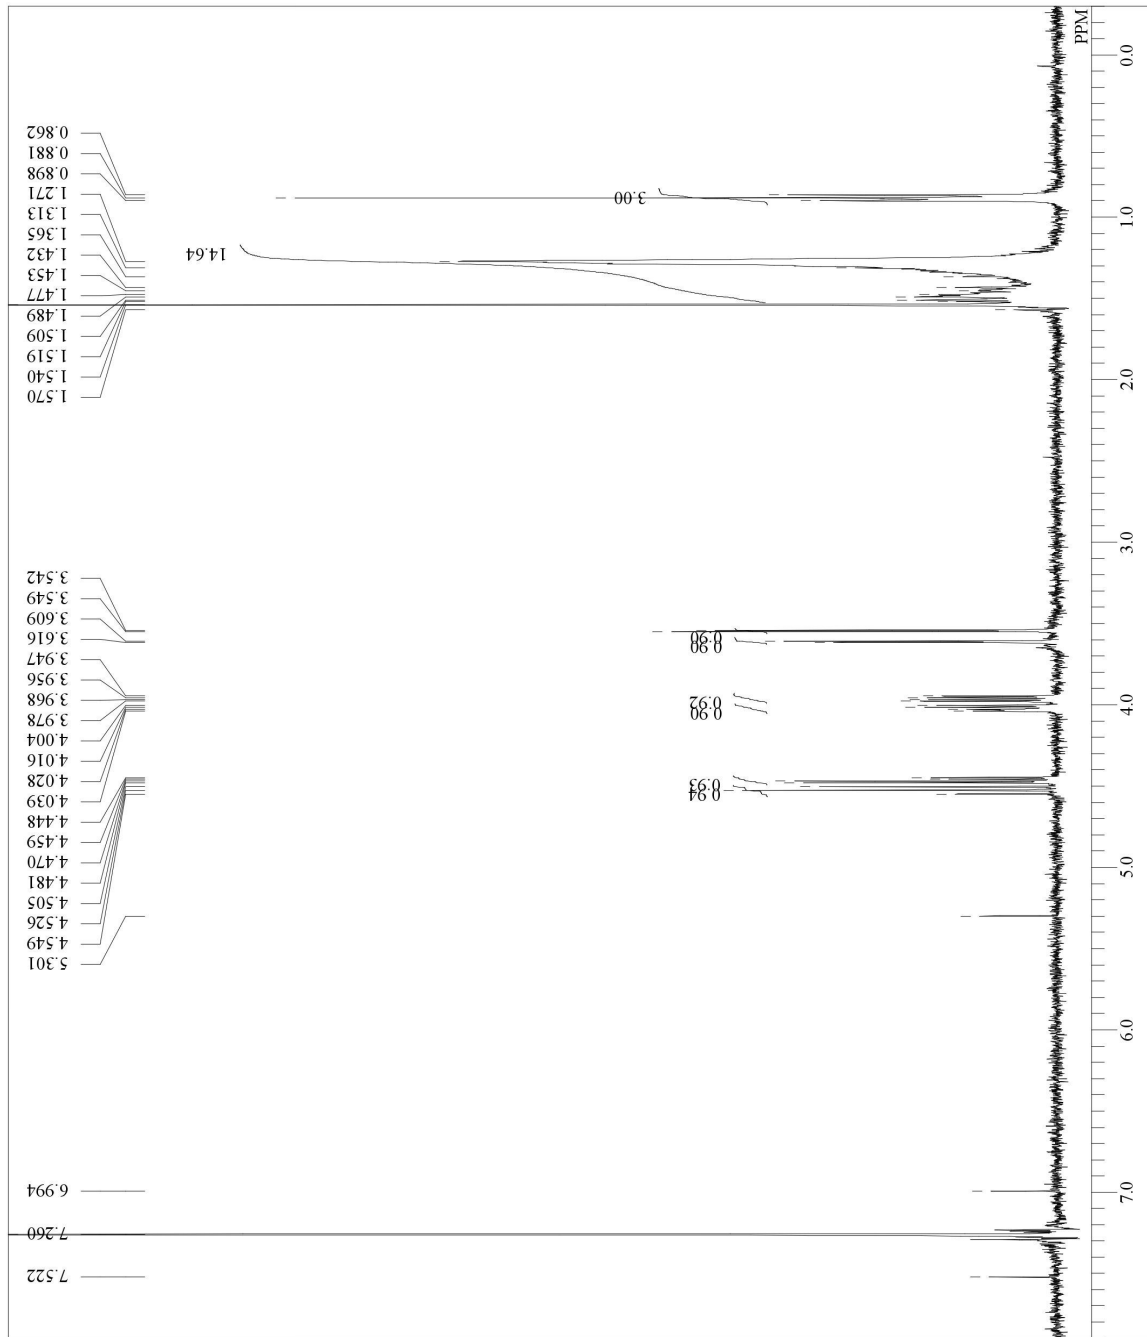

KEM\_1\_34\_1\_PRODUCT-T.als  
 KEM\_1\_34\_1\_PRODUCT  
 Wed Jul 09 14:50:37 2008

1H  
 NON  
 395.75 MHz  
 124.00 KHz  
 10277.00 Hz  
 16384  
 7912.96 Hz  
 8  
 2.0705 sec  
 4.9290 sec  
 5.20 usec  
 1H  
 22.7 c  
 CDCl3  
 7.26 ppm  
 0.24 Hz  
 20

DFILE  
 COMNT  
 DATIM  
 OBNUC  
 EXMOD  
 OBFREQ  
 OBSSET  
 OBFIN  
 POINT  
 FREQU  
 SCANS  
 ACQTM  
 PD  
 PW1  
 IRNUC  
 CTEMP  
 SLVNT  
 EXREF  
 BF  
 RGAIN

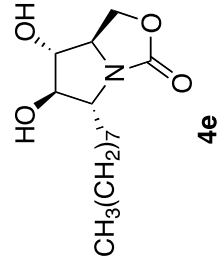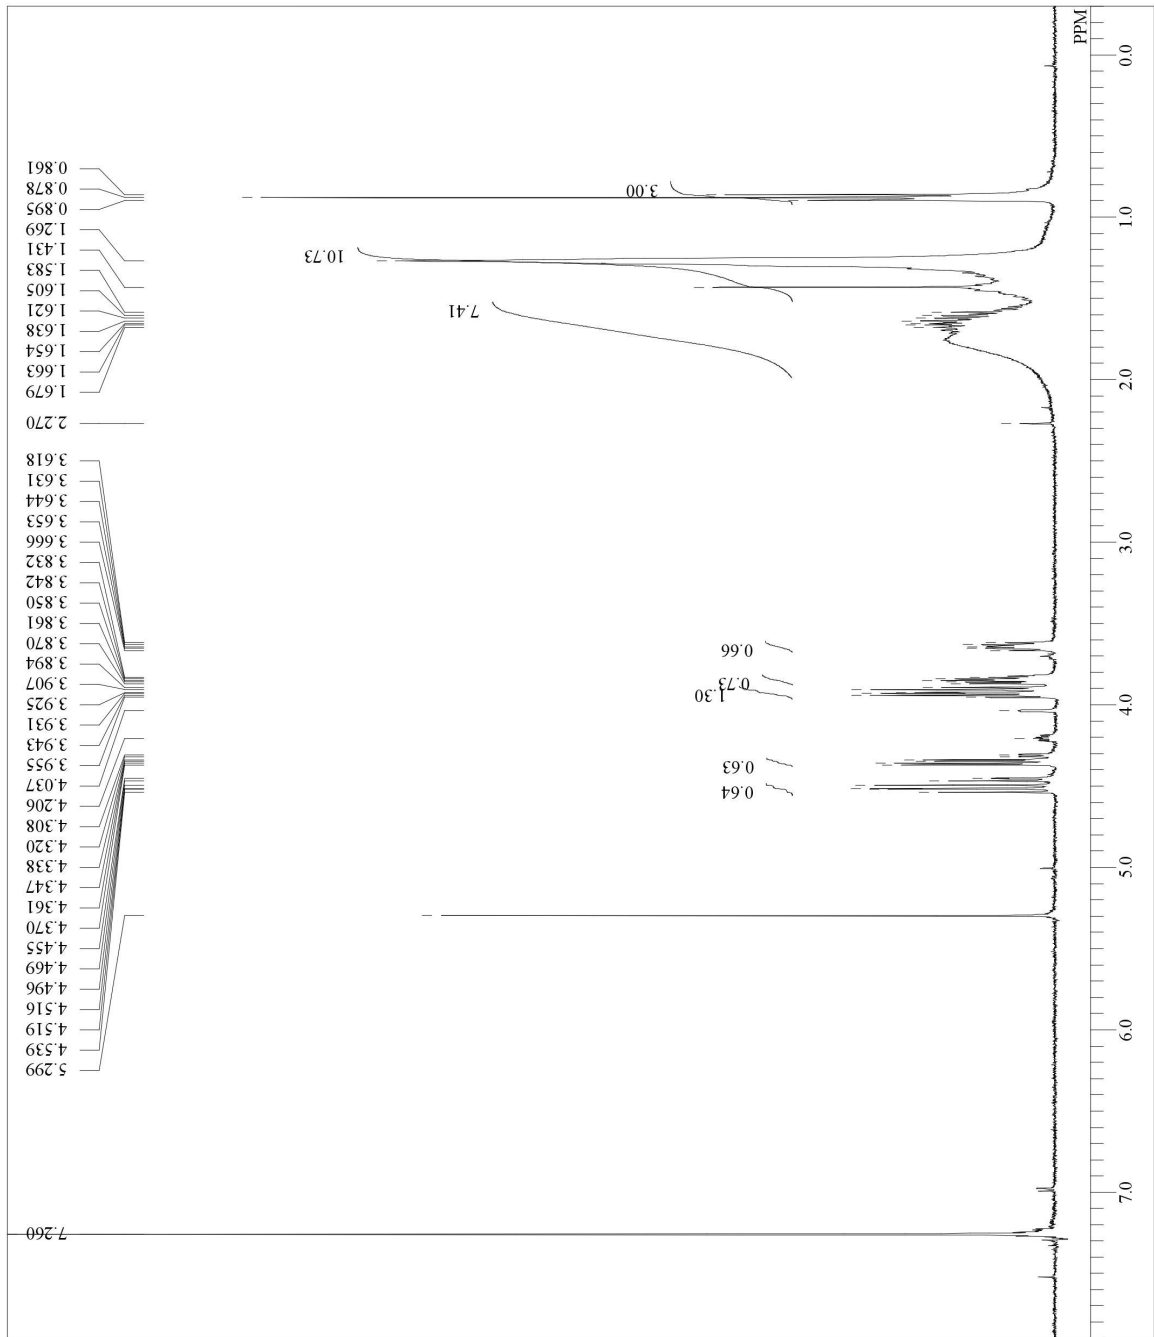

KEM\_1\_36\_1\_PRODUCT-T-did.als  
 KEM\_1\_36\_1\_PRODUCT  
 Fri Jul 11 11:54:59 2008

1H  
 NON  
 395.75 MHz  
 124.00 KHz  
 10277.00 Hz  
 16384  
 7912.96 Hz  
 8  
 2.0705 sec  
 4.9290 sec  
 5.20 usec  
 1H  
 22.4 c  
 CD3OD  
 3.30 ppm  
 0.24 Hz  
 16

DFILE  
 COMNT  
 DATIM  
 OBNUC  
 EXMOD  
 OBFRO  
 OBSET  
 OBFIN  
 POINT  
 FREQU  
 SCANS  
 ACQIM  
 PD  
 PW1  
 IRNUC  
 CTEMP  
 SLVNT  
 EXREF  
 BF  
 RGAIN

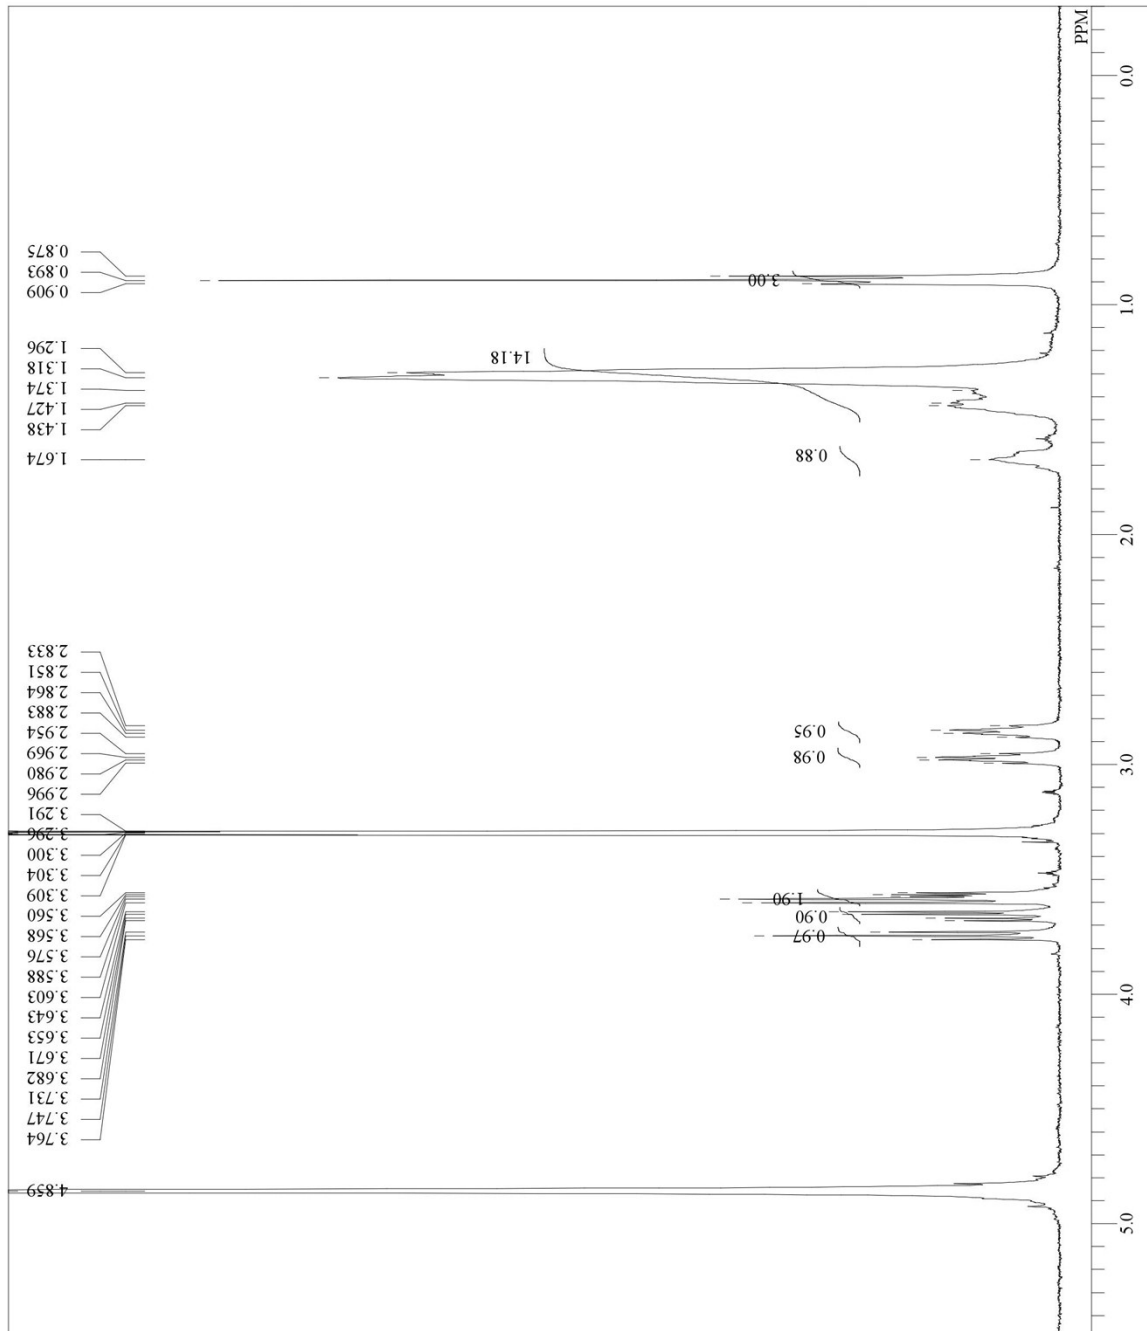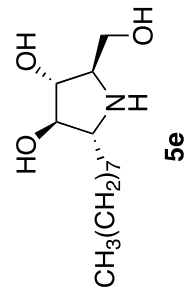

DFILE YAS01-31-01-did.als  
 COMNT YAS01-31-01  
 DATIM Tue Jul 17 14:42:41 2012  
 OBNUC 1H  
 EXMOD NON  
 OBFREQ 395.75 MHz  
 OBSSET 124.00 KHz  
 OBFIN 10277.00 Hz  
 POINT 16384  
 FREQU 7912.96 Hz  
 SCANS 8  
 ACQTM 2.0705 sec  
 PD 4.9290 sec  
 PW1 5.50 usec  
 IRNUC 1H  
 CTEMP 22.6 c  
 SLVNT CDCL3  
 EXREF 0.00 ppm  
 BF 0.24 Hz  
 RGAIN 14

DFILE YAS01-31-01-did.als  
 COMNT YAS01-31-01  
 DATIM Tue Jul 17 14:42:41 2012  
 OBNUC 1H  
 EXMOD NON  
 OBFREQ 395.75 MHz  
 OBSSET 124.00 KHz  
 OBFIN 10277.00 Hz  
 POINT 16384  
 FREQU 7912.96 Hz  
 SCANS 8  
 ACQTM 2.0705 sec  
 PD 4.9290 sec  
 PW1 5.50 usec  
 IRNUC 1H  
 CTEMP 22.6 c  
 SLVNT CDCL3  
 EXREF 0.00 ppm  
 BF 0.24 Hz  
 RGAIN 14

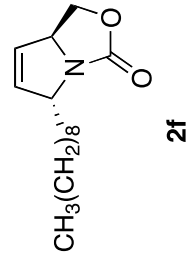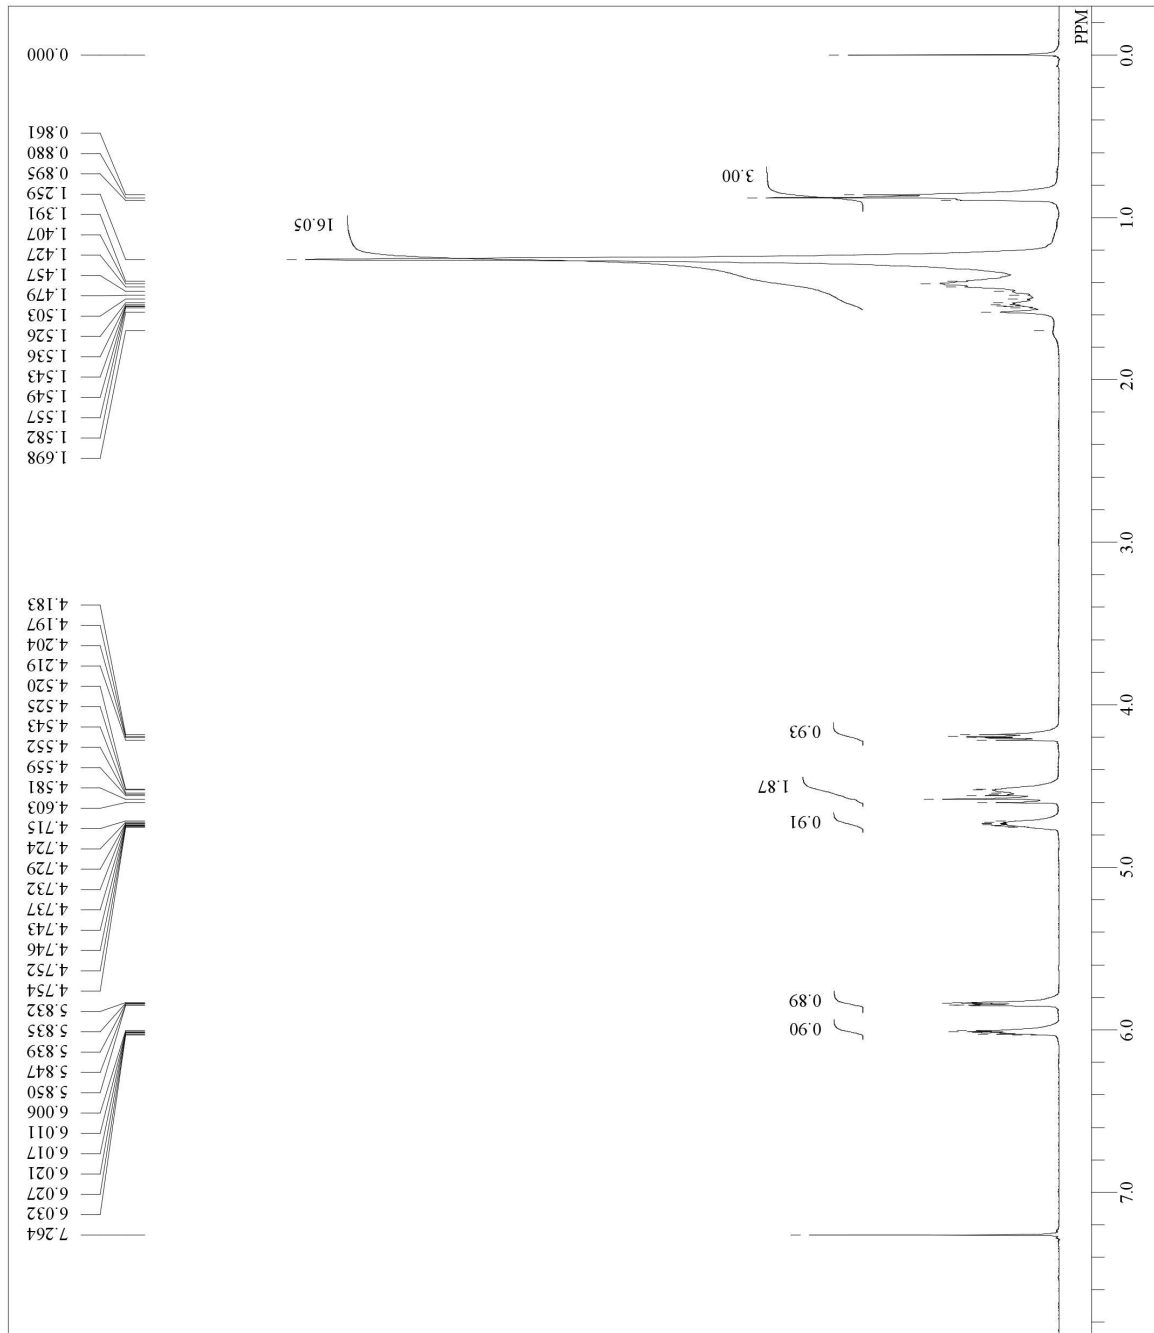

DFILE YAS01-34-dtd.als  
 COMNT YAS01-34  
 DATIM Fri Jul 20 11:36:19 2012  
 OBNUC 1H  
 EXMOD NON  
 OBFREQ 395.75 MHz  
 OBSETE 124.00 KHz  
 OBFIN 10277.00 Hz  
 POINT 16384  
 FREQU 7912.96 Hz  
 SCANS 8  
 ACQIM 2.0705 sec  
 PD 4.9290 sec  
 PW1 5.50 usec  
 IRNUC 1H  
 CTEMP 21.3 c  
 CDCL3  
 EXREF 0.00 ppm  
 BF 0.24 Hz  
 RGAIN 23

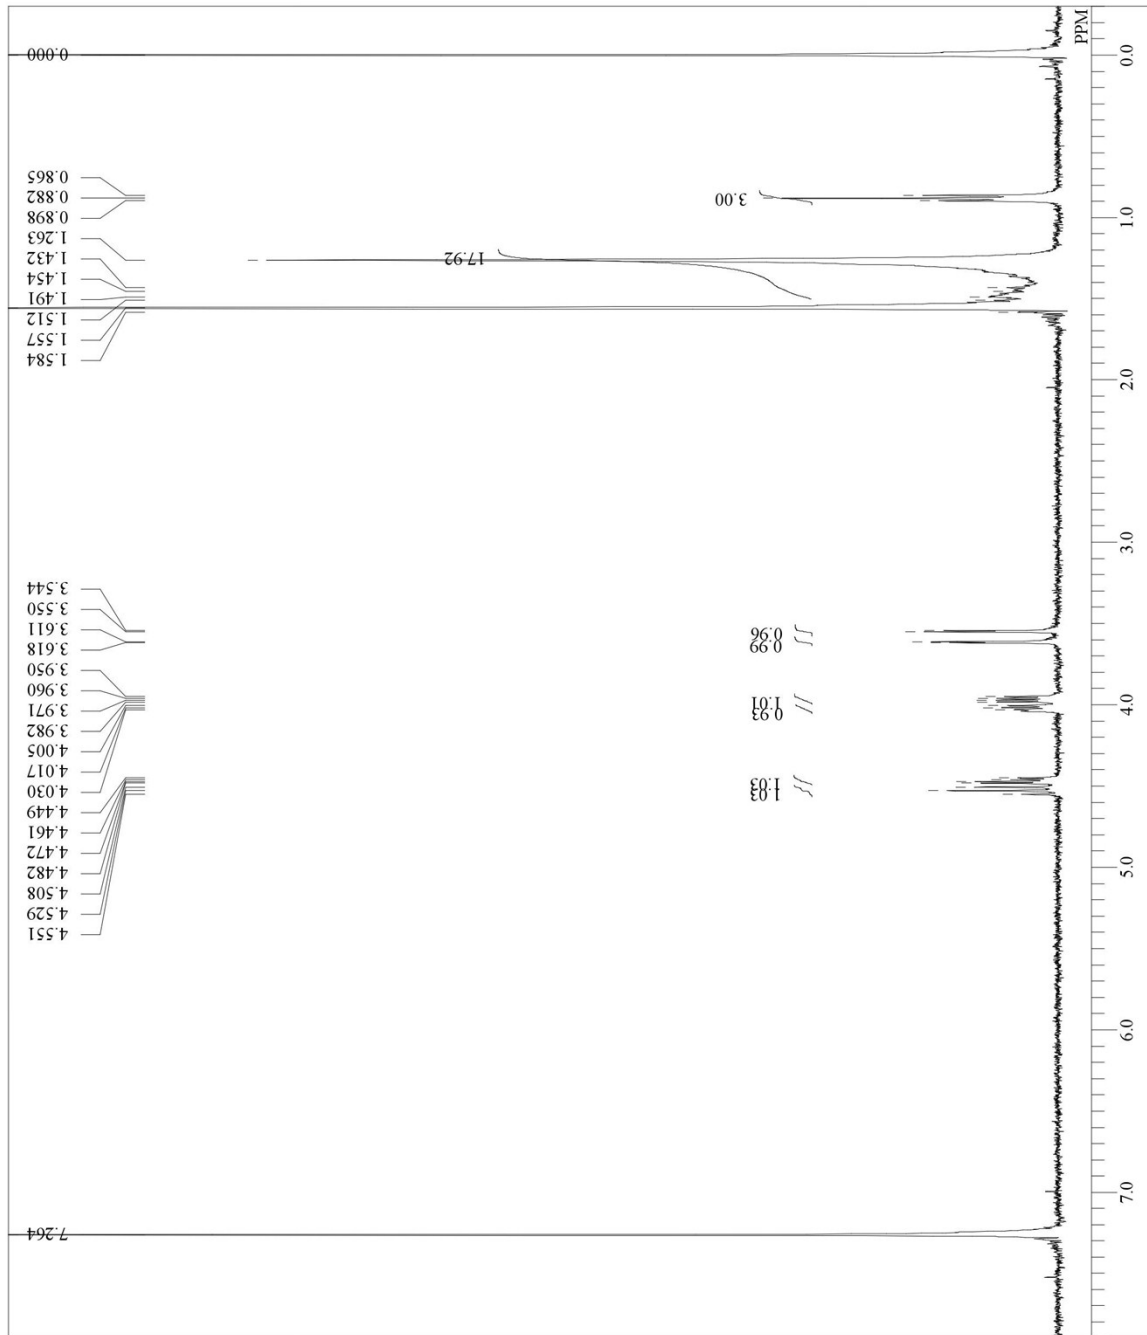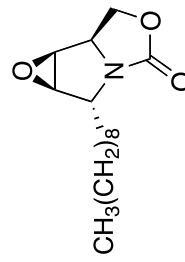

DFILE YAS01-39-dtd.als  
 COMNT YAS01-39  
 DATIM Tue Jul 31 16:22:51 2012  
 OBNUC 1H  
 EXMOD NON  
 OBFRQ 399.65 MHz  
 OBSET 124.00 KHz  
 OBFIN 10500.00 Hz  
 POINT 16384  
 FREQU 7992.01 Hz  
 SCANS 8  
 ACQIM 2.0501 sec  
 PD 4.9500 sec  
 PW1 5.80 usec  
 IRNUC 1H  
 CTEMP 26.1 c  
 SLVNT CDCL3  
 EXREF 0.00 ppm  
 BF 0.24 Hz  
 RGAIN 22

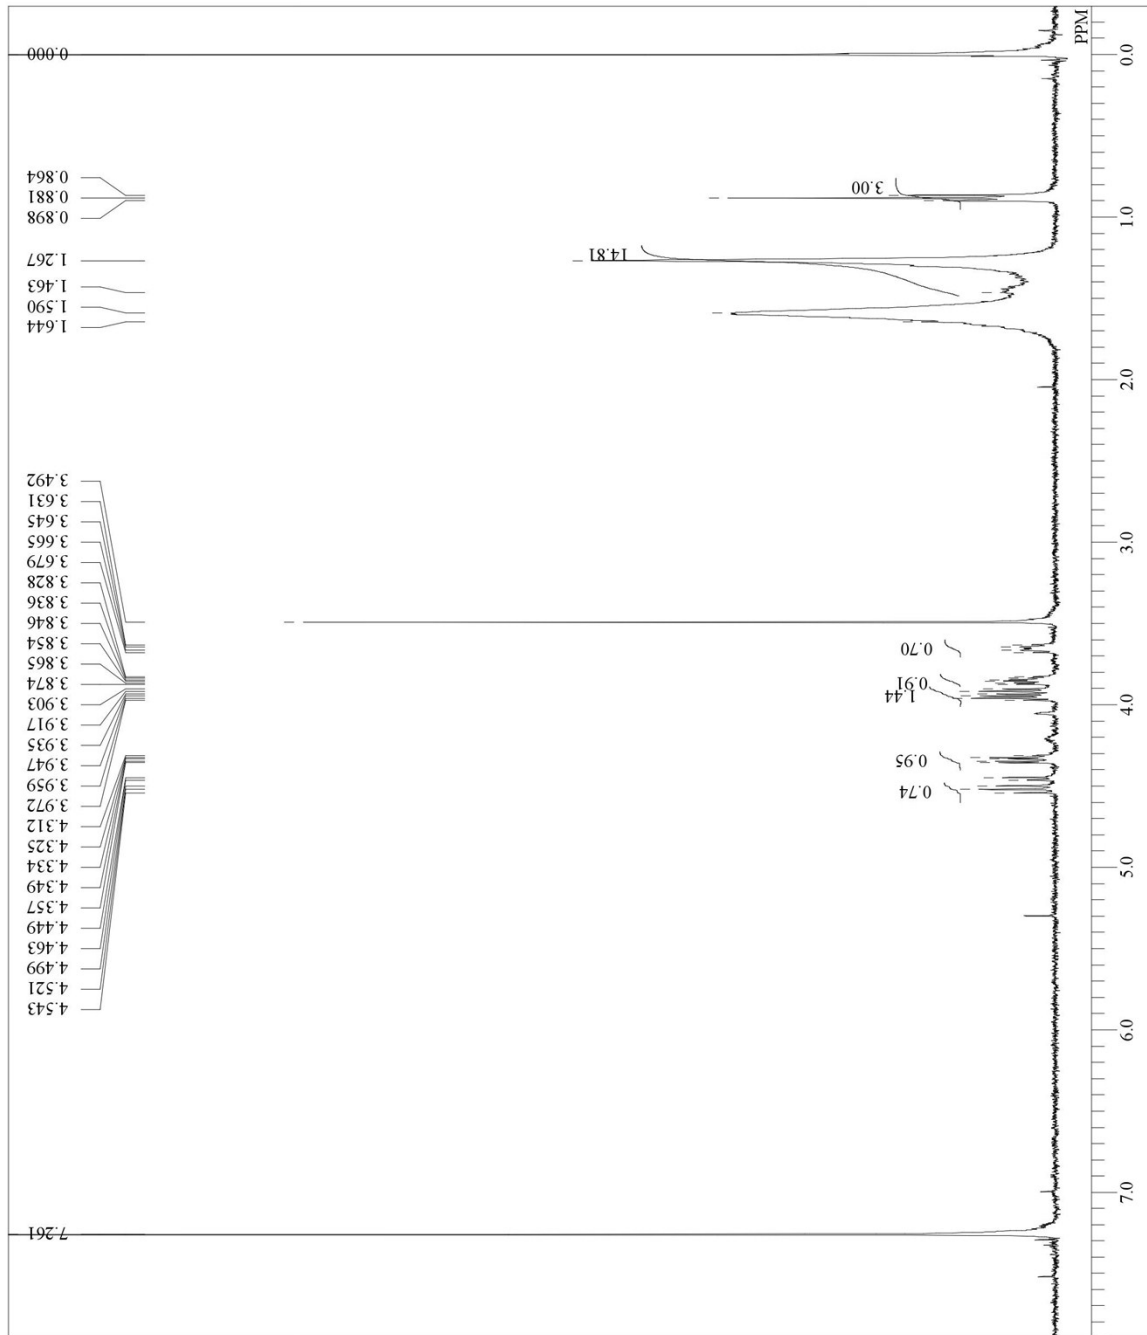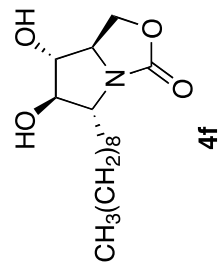

DFILE YAS02-01-2-dtd.als  
 COMNT YAS02-01-2  
 DATIM Thu Aug 30 09:46:53 2012  
 OBNUC 1H  
 EXMOD NON  
 OBFRQ 395.75 MHz  
 OBSET 124.00 KHz  
 OBFIN 10277.00 Hz  
 POINT 16384  
 FREQU 7912.96 Hz  
 SCANS 8  
 ACQTM 2.0705 sec  
 PD 4.9290 sec  
 PW1 5.50 usec  
 IRNUC 1H  
 CTEMP 21.6 c  
 SLVNT CD3OD  
 EXREF 3.30 ppm  
 BF 0.24 Hz  
 RGAIN 18

DFILE YAS02-01-2-dtd.als  
 COMNT YAS02-01-2  
 DATIM Thu Aug 30 09:46:53 2012  
 OBNUC 1H  
 EXMOD NON  
 OBFRQ 395.75 MHz  
 OBSET 124.00 KHz  
 OBFIN 10277.00 Hz  
 POINT 16384  
 FREQU 7912.96 Hz  
 SCANS 8  
 ACQTM 2.0705 sec  
 PD 4.9290 sec  
 PW1 5.50 usec  
 IRNUC 1H  
 CTEMP 21.6 c  
 SLVNT CD3OD  
 EXREF 3.30 ppm  
 BF 0.24 Hz  
 RGAIN 18

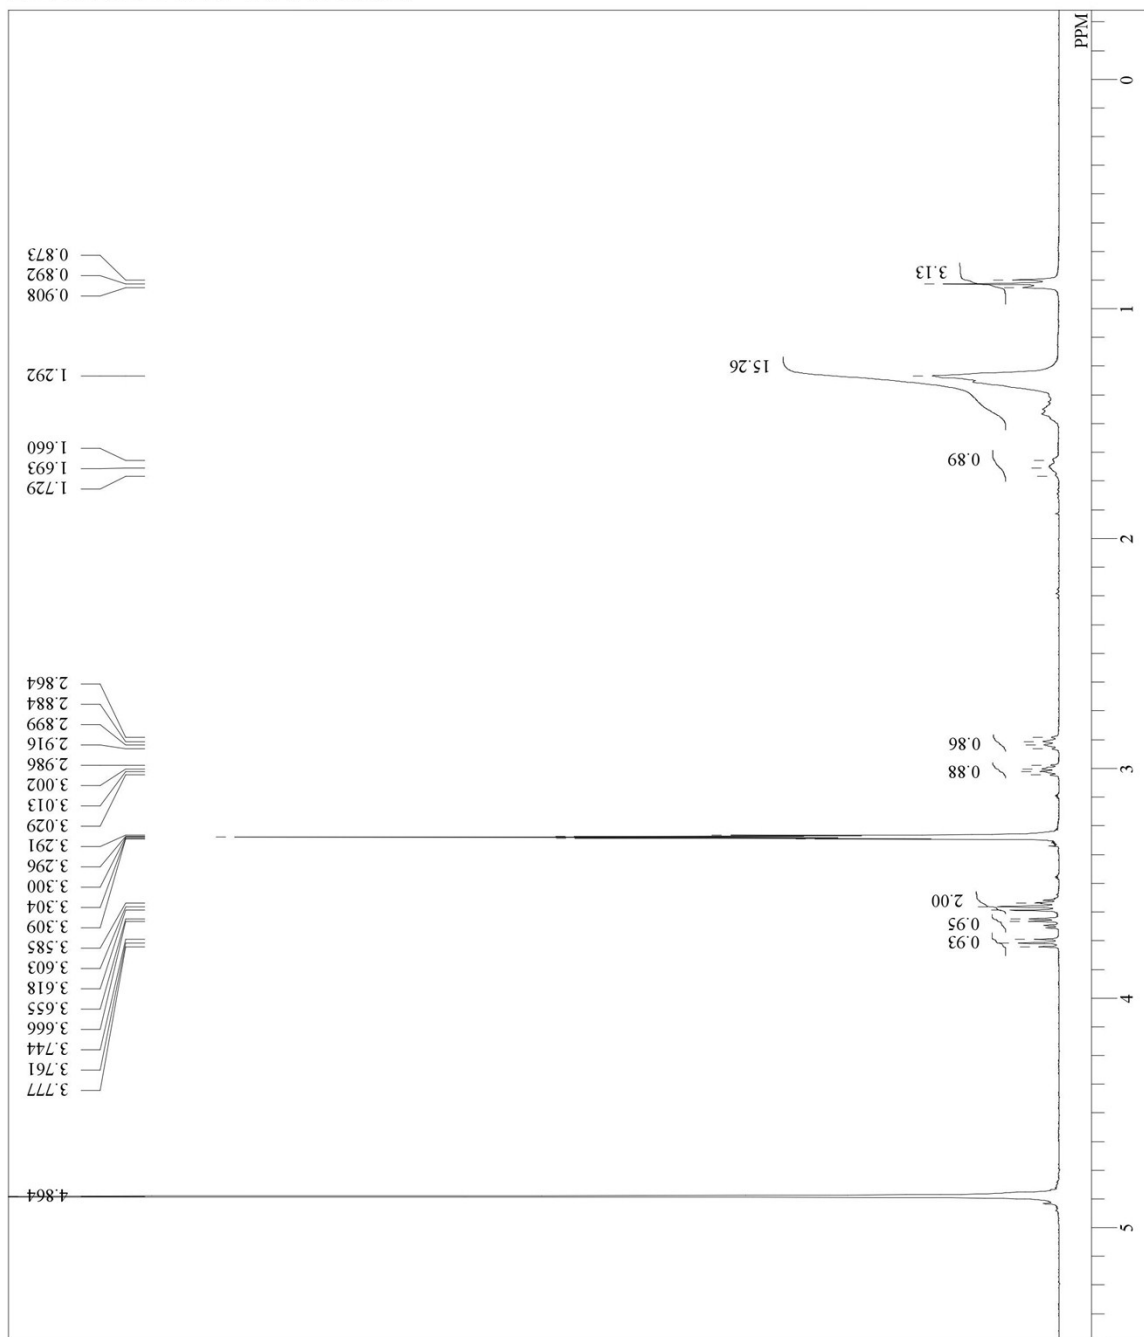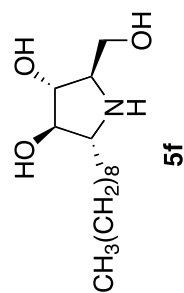

DFILE SAK 2-11-01 dtd.als  
 COMNT SAK 2-11-01  
 DATIM Sat Jul 14 01:25:28 2012  
 OBNUC 1H  
 EXMOD NON  
 OBFRQ 395.75 MHz  
 OBSET 124.00 KHz  
 OBFIN 10277.00 Hz  
 POINT 16384  
 FREQU 7912.96 Hz  
 SCANS 8  
 ACQIM 2.0705 sec  
 PD 4.9290 sec  
 PW1 5.50 usec  
 IRNUC 1H  
 CTEMP 21.3 c  
 SLVNT CDCL3  
 EXREF 0.00 ppm  
 BF 0.24 Hz  
 RGAIN 15

DFILE SAK 2-11-01 dtd.als  
 COMNT SAK 2-11-01  
 DATIM Sat Jul 14 01:25:28 2012  
 OBNUC 1H  
 EXMOD NON  
 OBFRQ 395.75 MHz  
 OBSET 124.00 KHz  
 OBFIN 10277.00 Hz  
 POINT 16384  
 FREQU 7912.96 Hz  
 SCANS 8  
 ACQIM 2.0705 sec  
 PD 4.9290 sec  
 PW1 5.50 usec  
 IRNUC 1H  
 CTEMP 21.3 c  
 SLVNT CDCL3  
 EXREF 0.00 ppm  
 BF 0.24 Hz  
 RGAIN 15

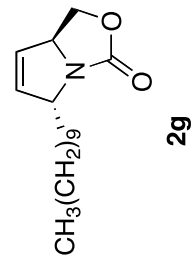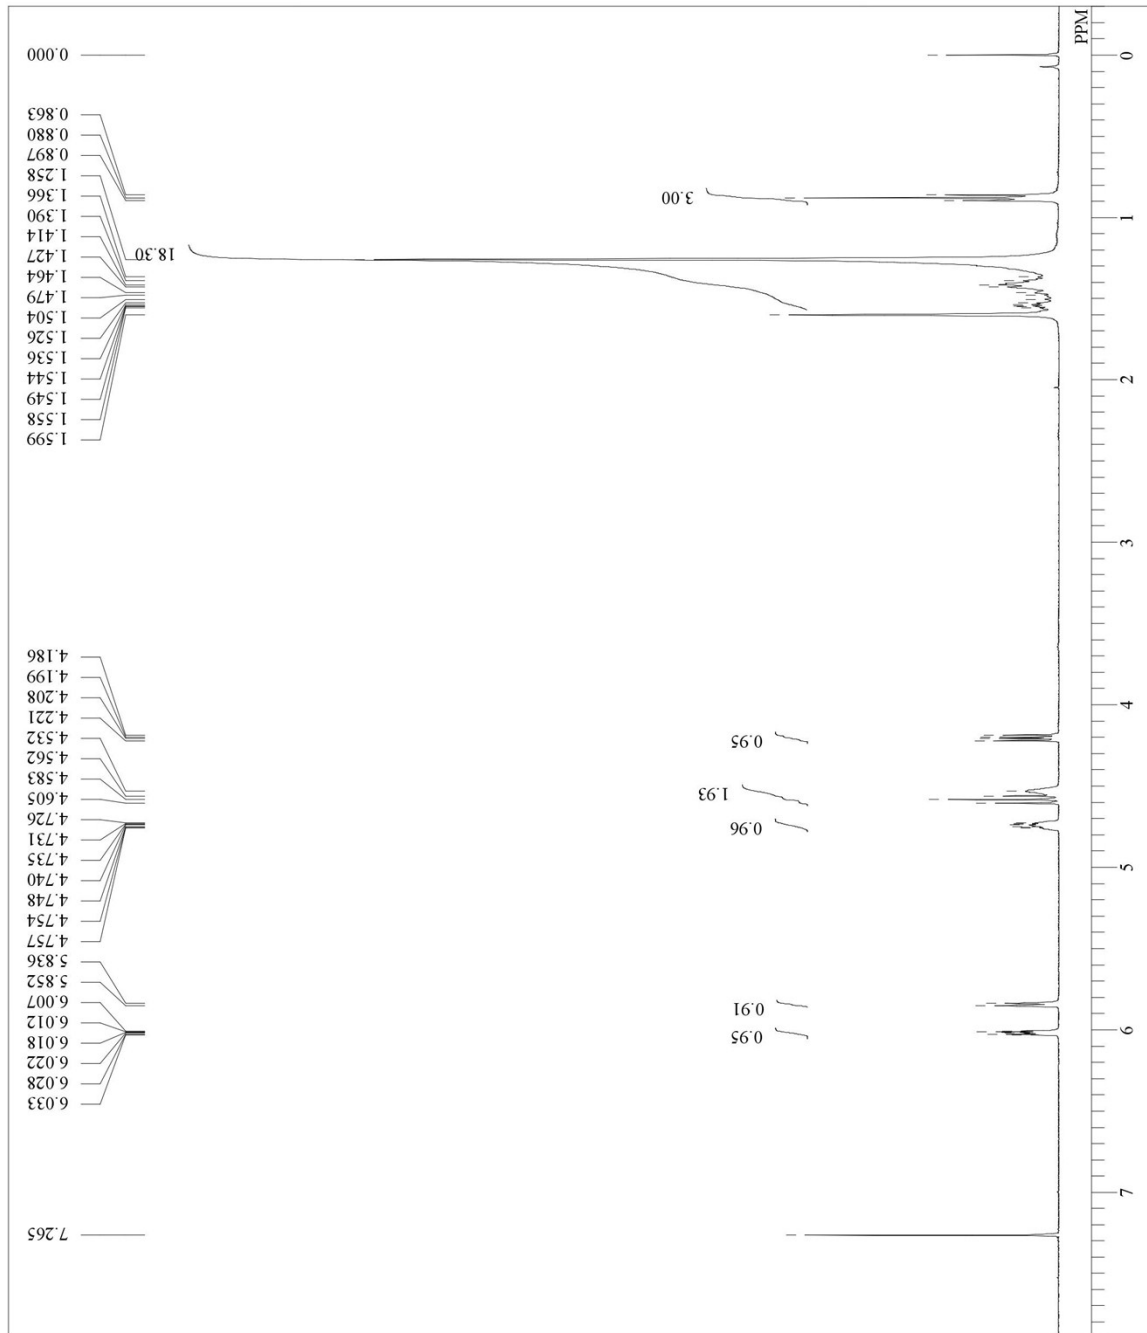



DFILE YAS01-35-dtd.als  
 COMNT YAS01-35  
 DATIM Fri Jul 20 11:44:10 2012

OBNUC 1H  
 EXMOD NON  
 OBFRQ 395.75 MHz  
 OBSET 124.00 KHz  
 OBFIN 10277.00 Hz  
 POINT 16384  
 FREQU 7912.96 Hz  
 SCANS 8  
 ACQIM 2.0705 sec  
 PD 4.9290 sec  
 PW1 5.50 usec  
 IRNUC 1H  
 CTEMP 21.4 c  
 SLVNT CDCL3  
 EXREF 0.00 ppm  
 BF 0.24 Hz  
 RGAIN 23

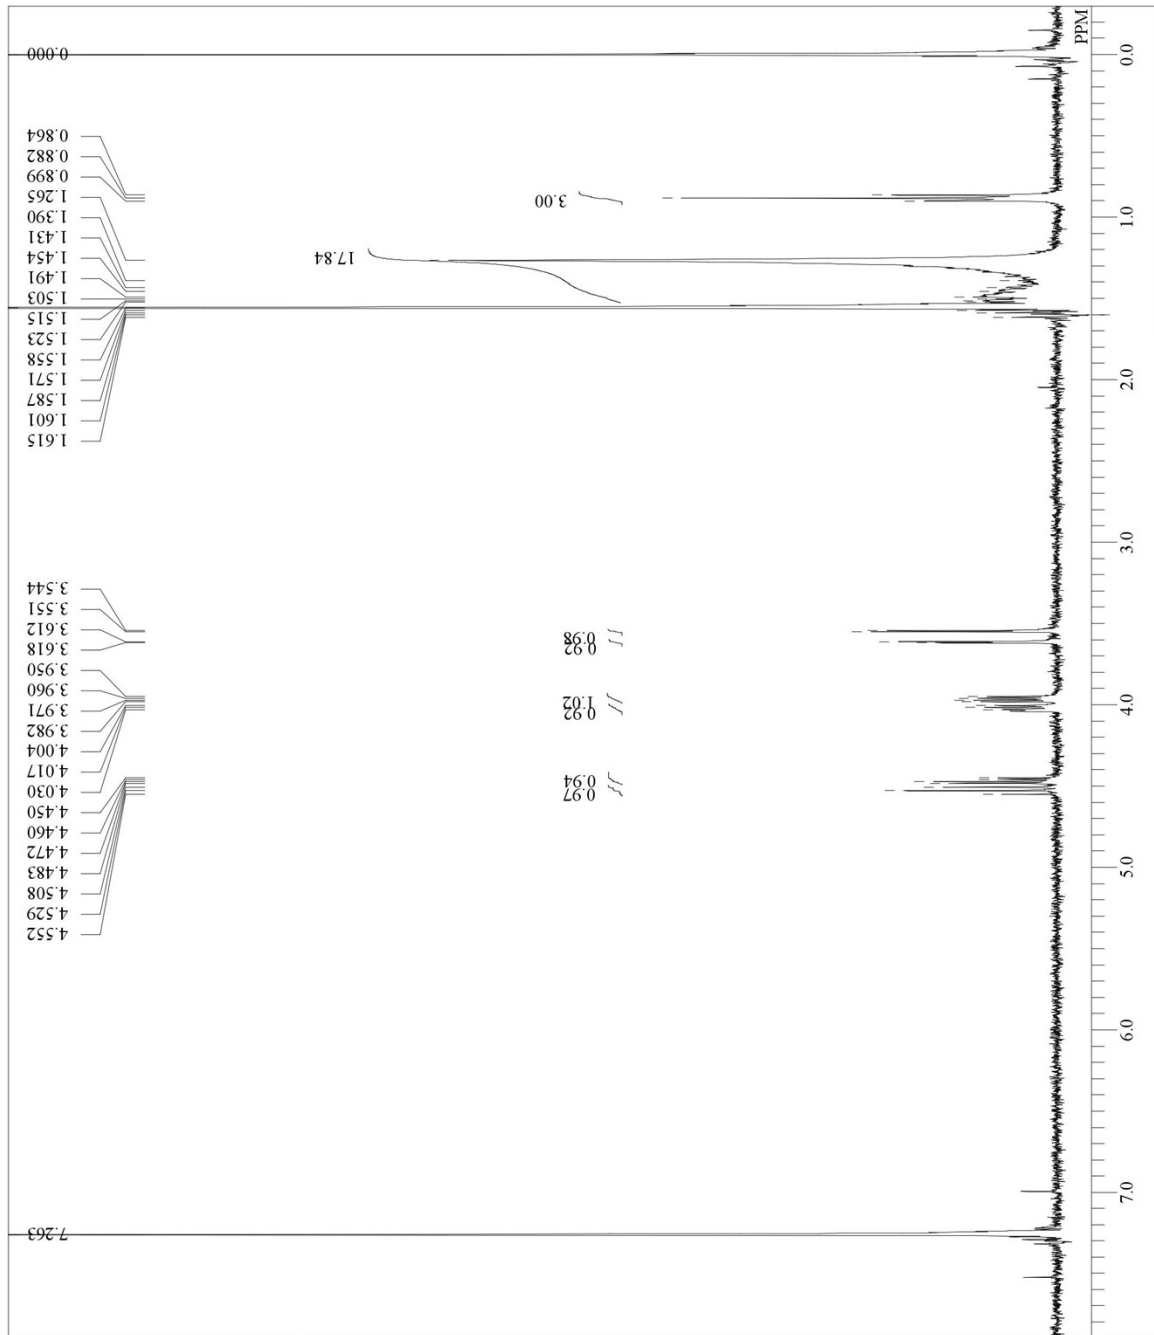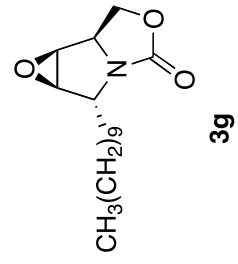

DFILE YAS01-36-dtd.als  
 COMNT YAS01-36  
 DATIM Tue Jul 31 10:46:35 2012  
 OBNUC 1H  
 EXMOD NON  
 OBFREQ 395.75 MHz  
 OBSSET 124.00 KHz  
 OBFIN 10277.00 Hz  
 POINT 16384  
 FREQU 7912.96 Hz  
 SCANS 8  
 ACQTM 2.0705 sec  
 PD 4.9290 sec  
 PW1 5.50 usec  
 IRNUC 1H  
 CTEMP 21.8 c  
 CDCL3  
 SLVNT 0.00 ppm  
 EXREF 0.24 Hz  
 BF 14  
 RGAIN

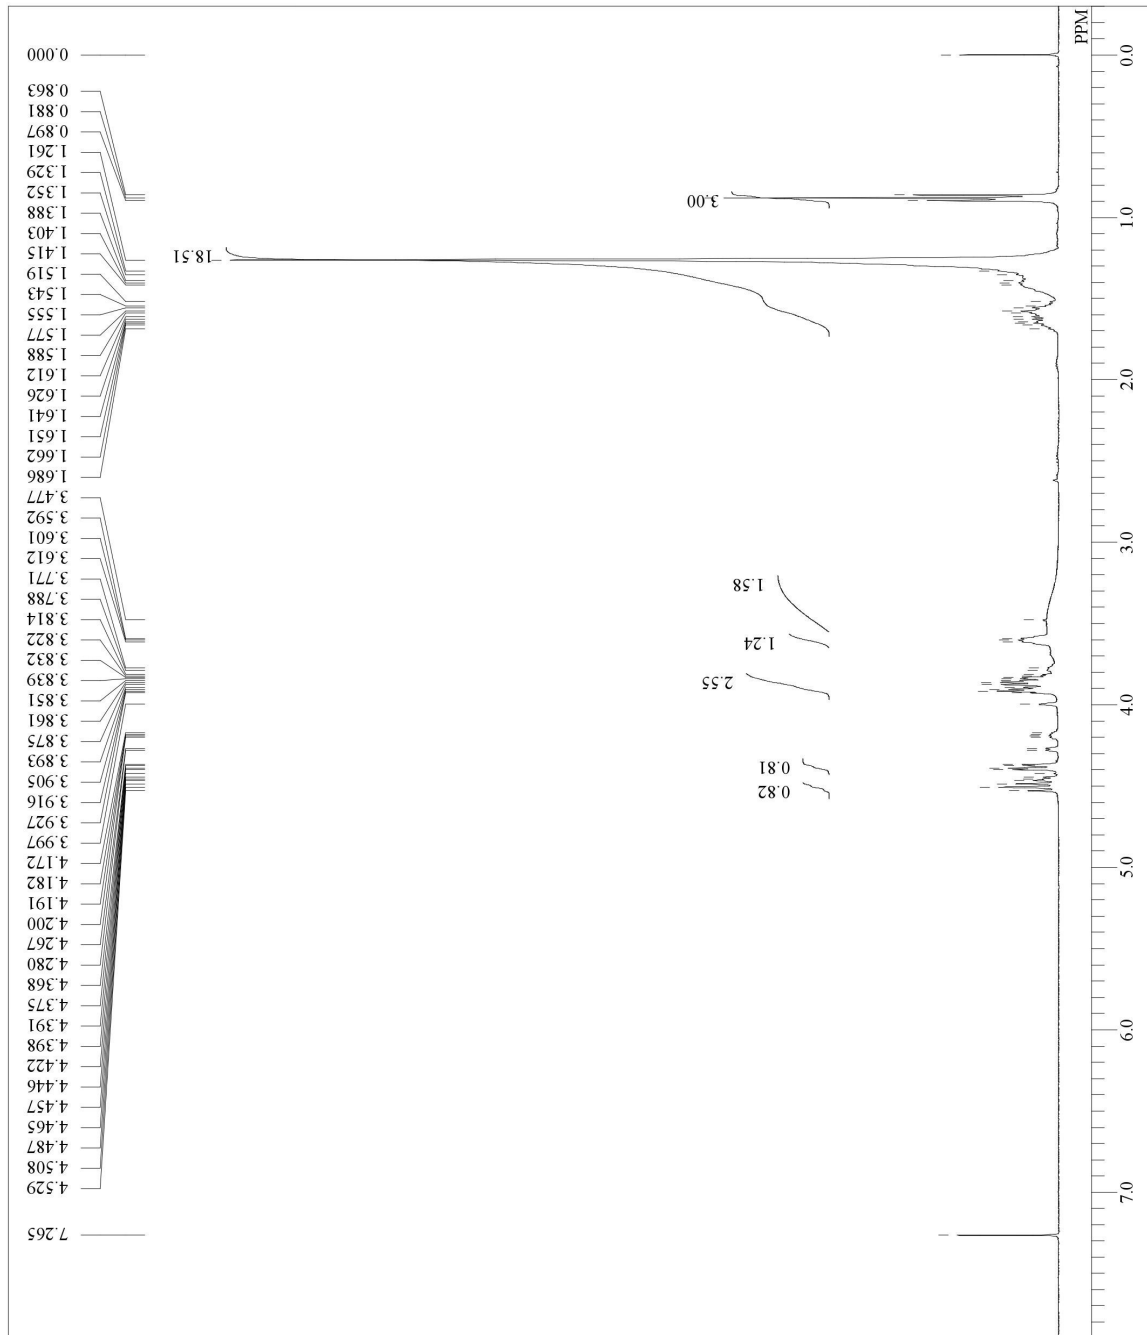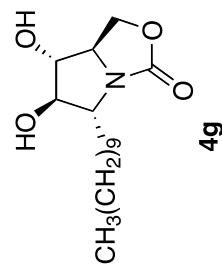

DFILE YAS01-41-dtd.als  
 COMNT YAS01-41  
 DATIM Mon Aug 27 15:05:21 2012  
 OBNUC 1H  
 EXMOD NQX  
 OBFRQ 395.75 MHz  
 OBSET 124.00 KHz  
 OBFIN 10277.00 Hz  
 POINT 16384  
 FREQU 7912.96 Hz  
 SCANS 8  
 ACQIM 2.0705 sec  
 PD 4.9290 sec  
 PW1 5.50 usec  
 IRNUC 1H  
 CTEMP 22.2 c  
 SLVNT CD3OD  
 EXREF 3.30 ppm  
 BF 0.24 Hz  
 RGAIN 18

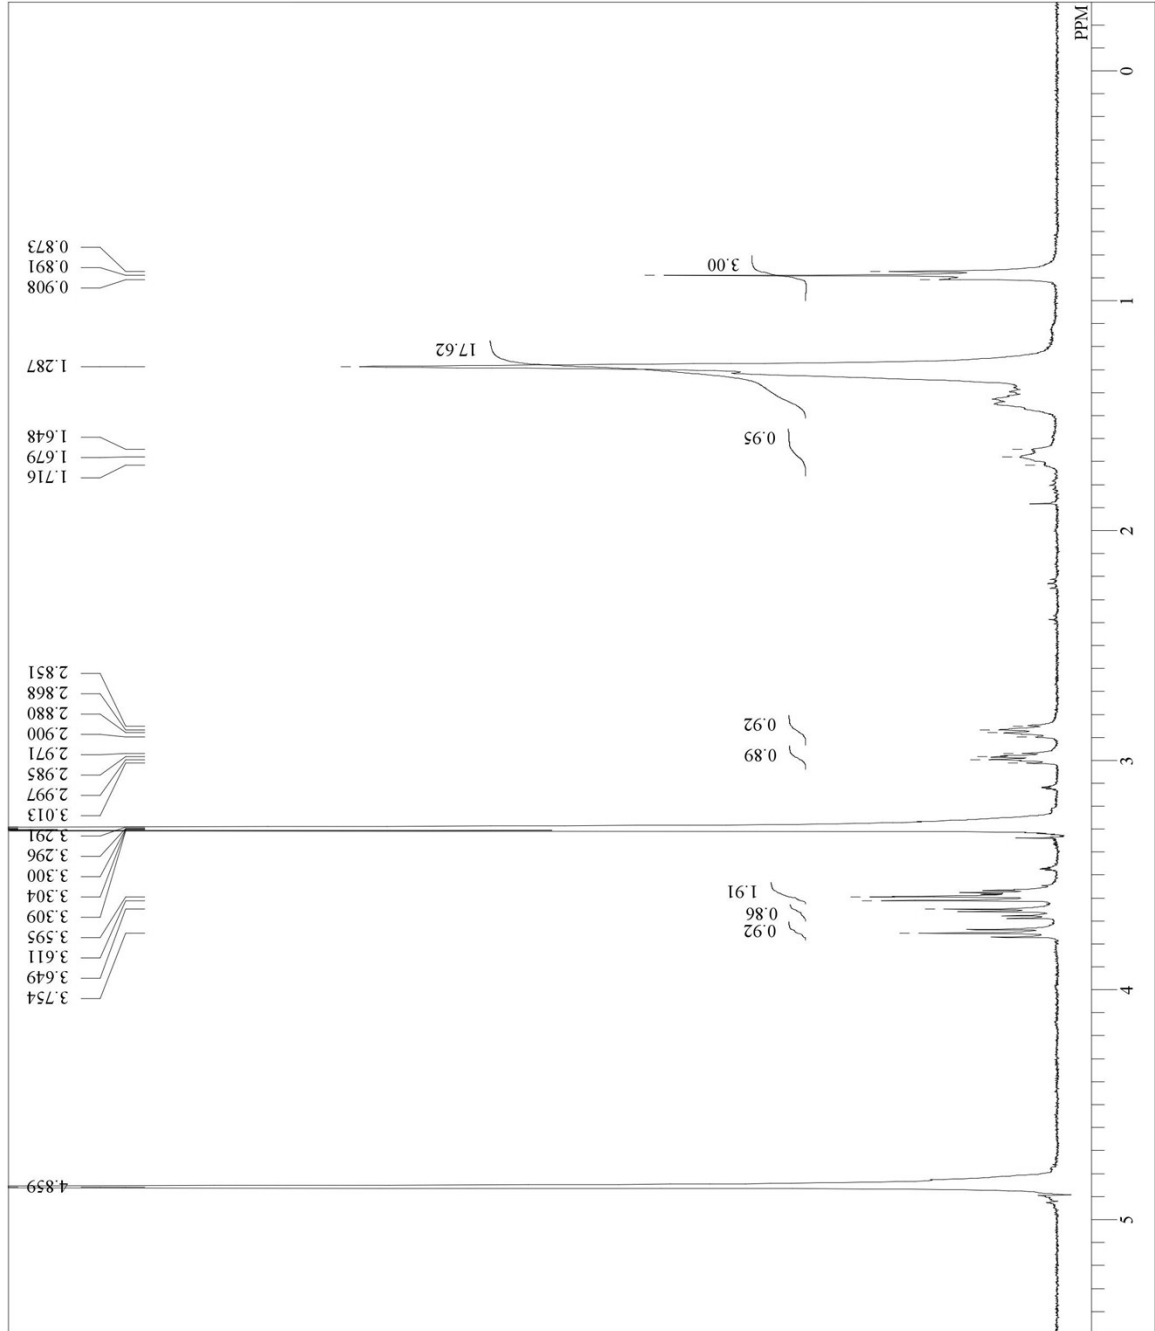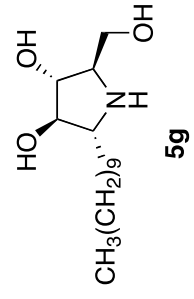

DFILE SAK 2-9-03 did.als  
 COMNT SAK 2-9-03  
 DATIM Mon Jul 09 17:08:00 2012  
 OBNUC 1H  
 EXMOD NON  
 OBFREQ 395.75 MHz  
 OBSSET 124.00 KHz  
 OBFIN 10277.00 Hz  
 POINT 16384  
 FREQU 7912.96 Hz  
 SCANS 8  
 ACQTM 2.0705 sec  
 PD 4.9290 sec  
 PW1 5.50 usec  
 IRNUC 1H  
 CTEMP 20.8 c  
 SLVNT CDCL3  
 EXREF 0.00 ppm  
 BF 0.24 Hz  
 RGAIN 18

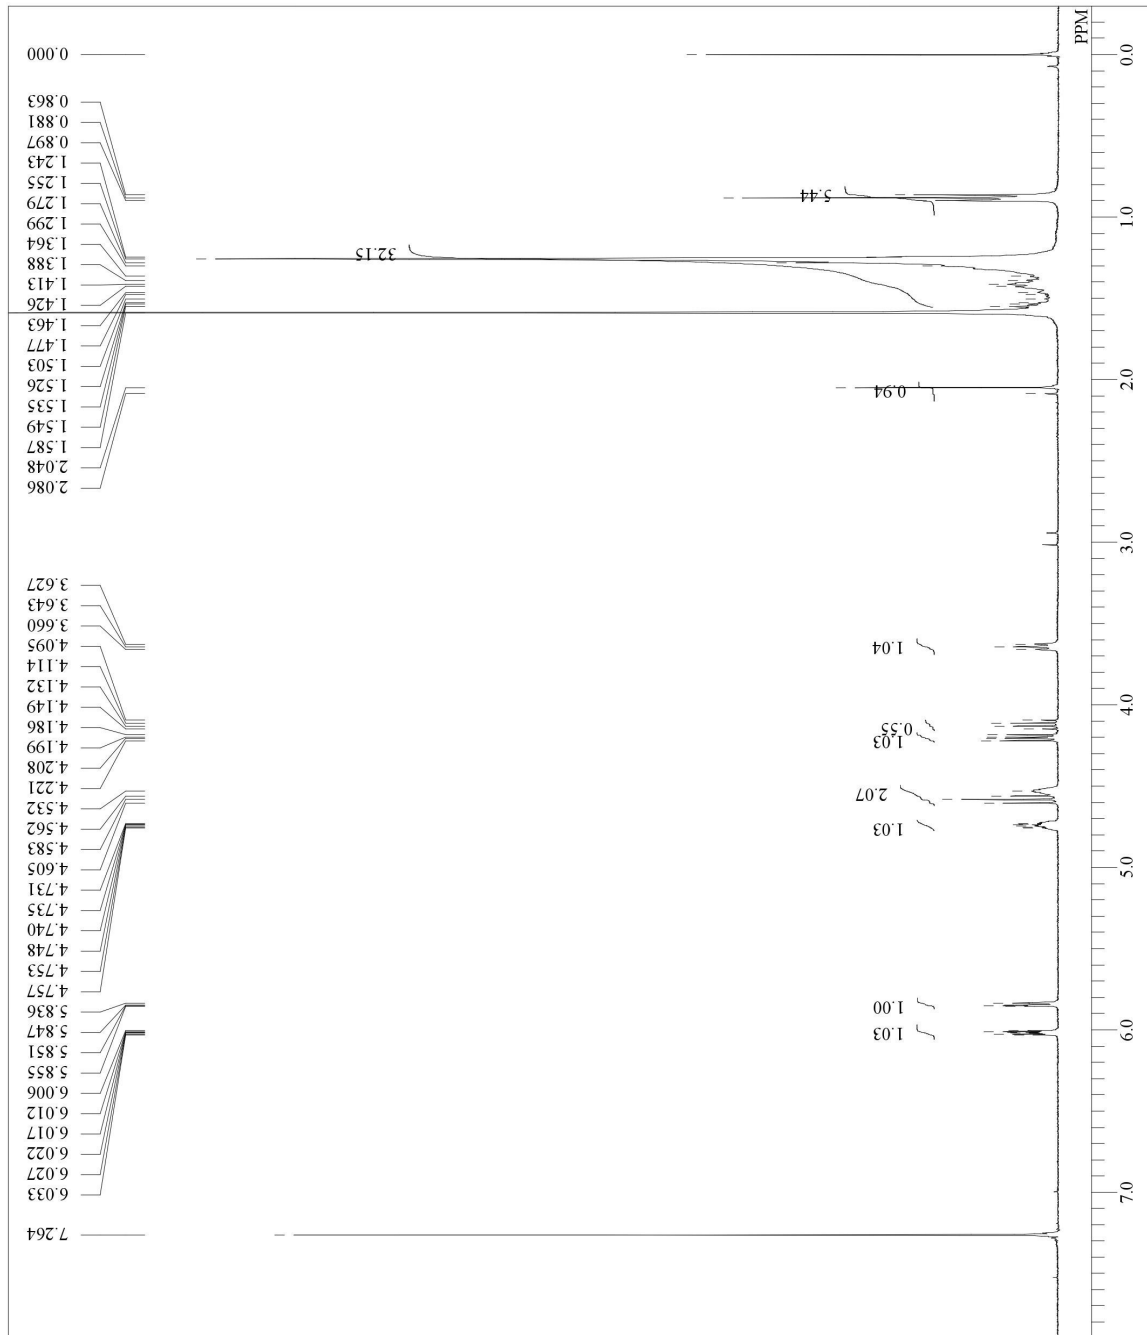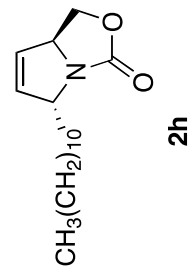

DFILE SAK 2-10-01 dtd.als  
 COMNT SAK 2-10-01  
 DATIM Thu Jul 12 13:31:11 2012  
 OBNUC 1H  
 EXMOD NON  
 OBFREQ 395.75 MHz  
 OBSET 124.00 KHz  
 OBFN 10277.00 Hz  
 POINT 16384  
 FREQU 7912.96 Hz  
 SCANS 8  
 ACQIM 2.0705 sec  
 PD 4.9290 sec  
 PW1 5.50 usec  
 IRNUC 1H  
 CTEMP 20.9 c  
 SLVNT CDCL3  
 EXREF 0.00 ppm  
 BF 0.12 Hz  
 RGAIN 22

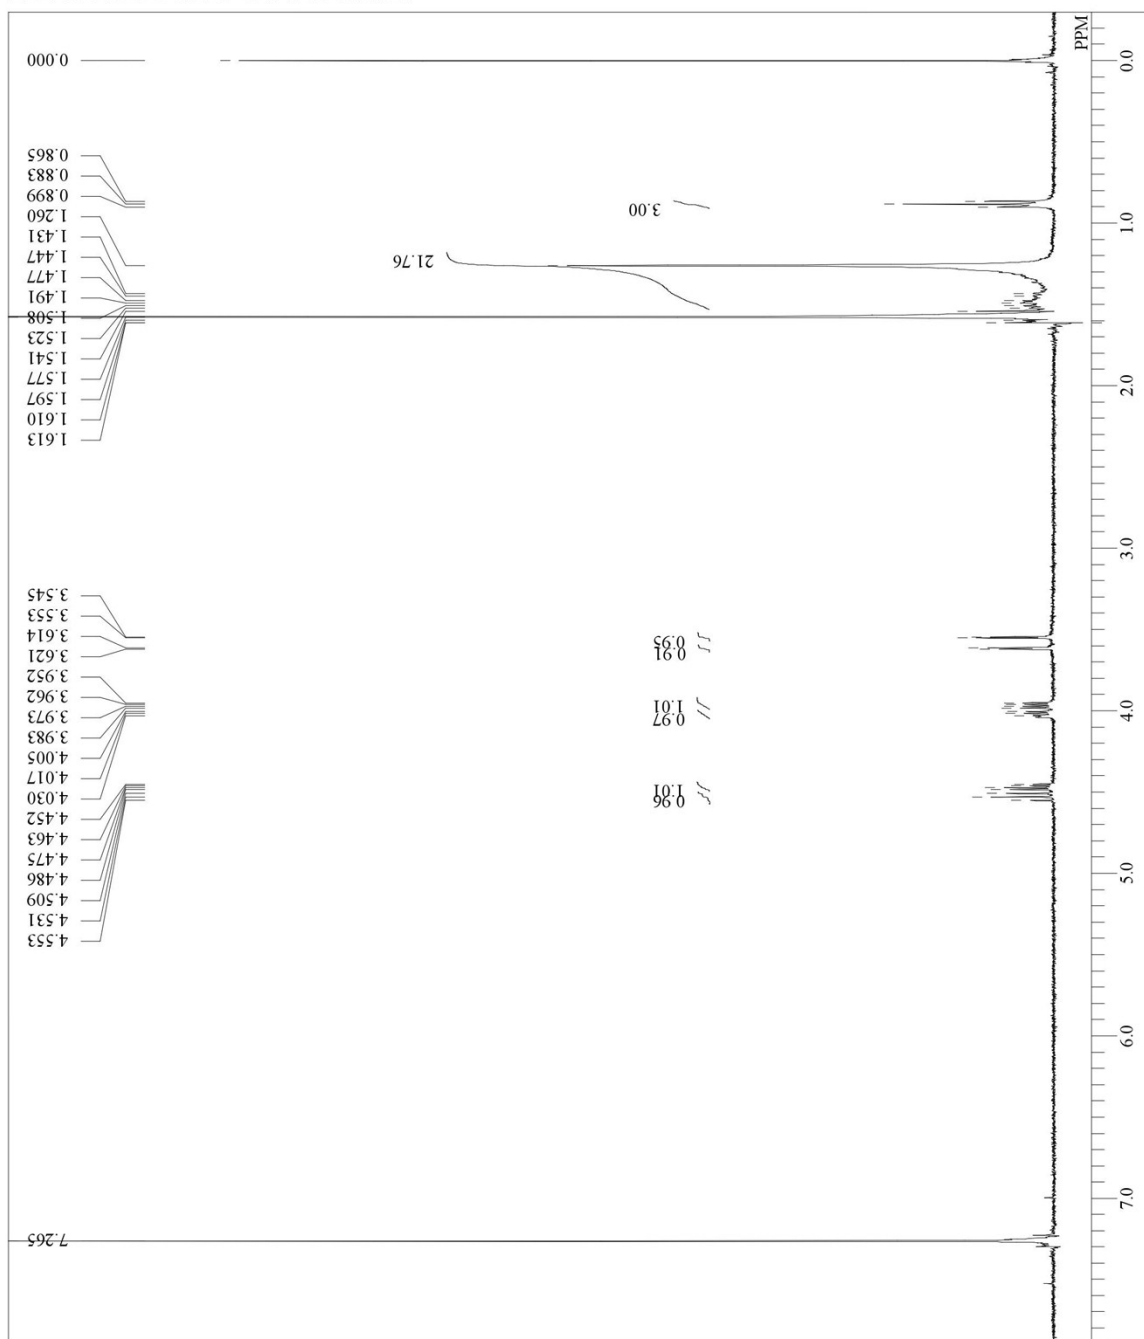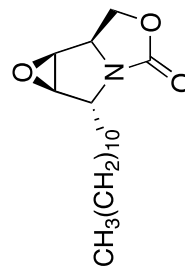

DFILE YAS01-33-01-did.als  
 COMNT YAS01-33-01  
 DATIM Thu Jul 26 10:44:47 2012  
 OBNUC 1H  
 EXMOD NON  
 OBFREQ 395.75 MHz  
 OBSET 124.00 KHz  
 OBFIN 10277.00 Hz  
 POINT 16384  
 FREQU 7912.96 Hz  
 SCANS 8  
 ACQTM 2.0705 sec  
 PD 4.9290 sec  
 PW1 5.50 usec  
 IRNUC 1H  
 CTEMP 21.3 c  
 SLVNT CDCL3  
 EXREF 0.00 ppm  
 BF 0.24 Hz  
 RGAIN 25

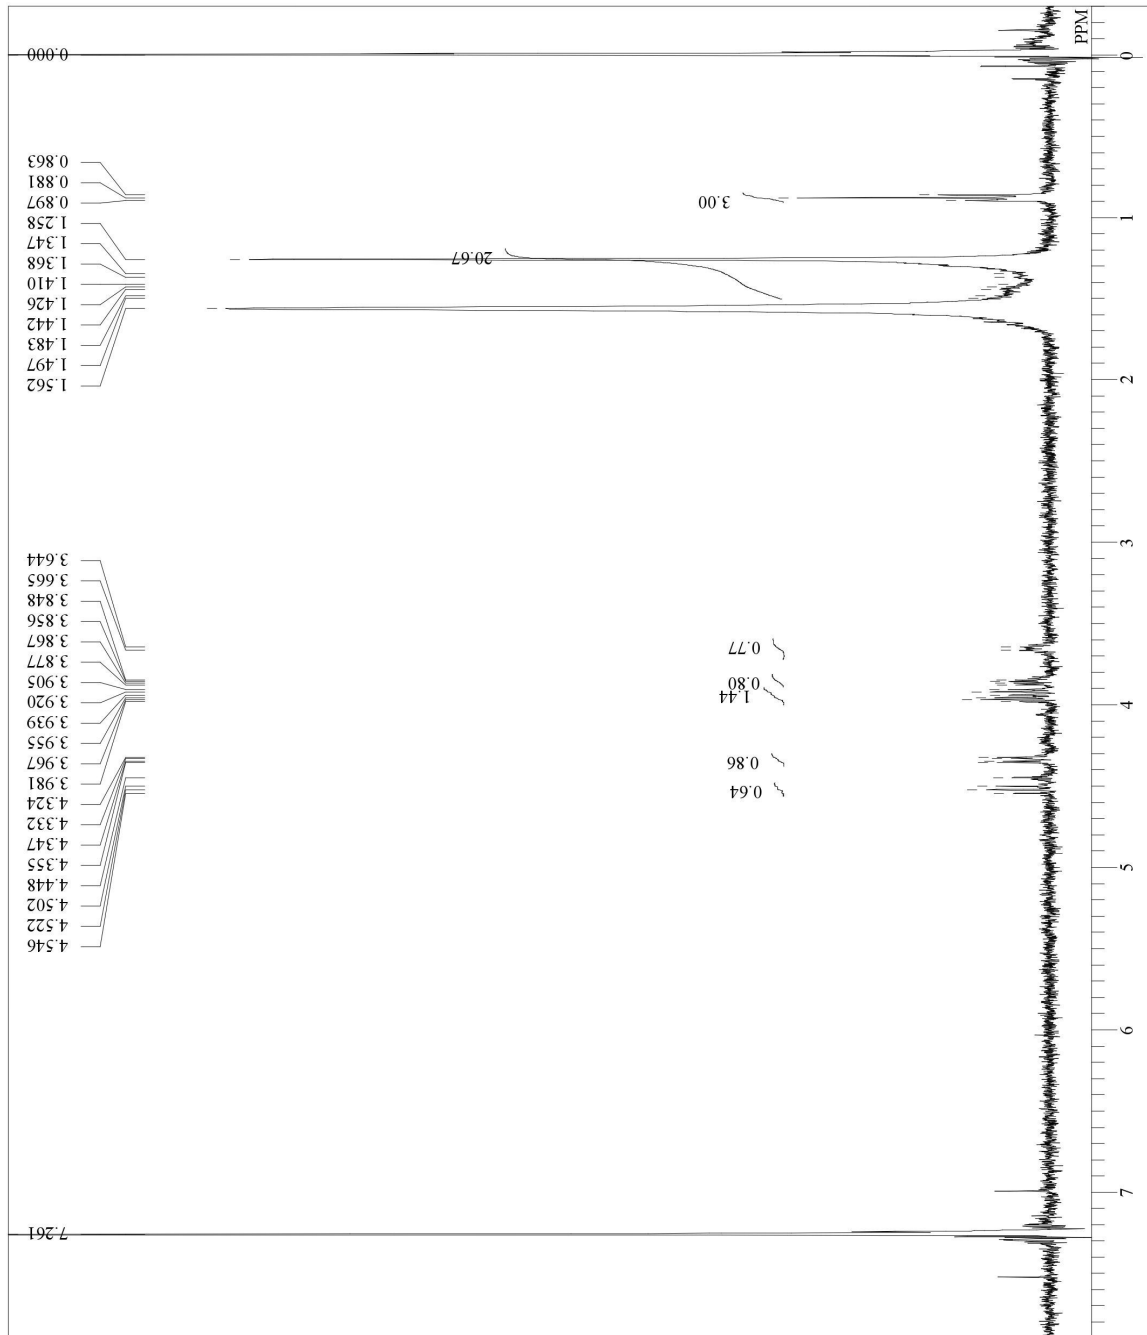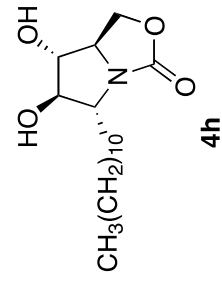

DFILE YAS01-38-02-41d.als  
 COMNT YAS01-38-01  
 DATIM Tue Jul 31 10:41:17 2012  
 OBNUC 1H  
 EXMOD NON  
 OBFRQ 395.75 MHz  
 OBSET 124.00 KHz  
 OBFIN 10277.00 Hz  
 POINT 16384  
 FREQU 7912.96 Hz  
 SCANS 8  
 ACQTIM 2.0705 sec  
 PD 4.9290 sec  
 PW1 5.50 usec  
 IRNUC 1H  
 CTEMP 22.0 c  
 SLVNT CD3OD  
 EXREF 3.30 ppm  
 BF 0.01 Hz  
 RGAIN 17

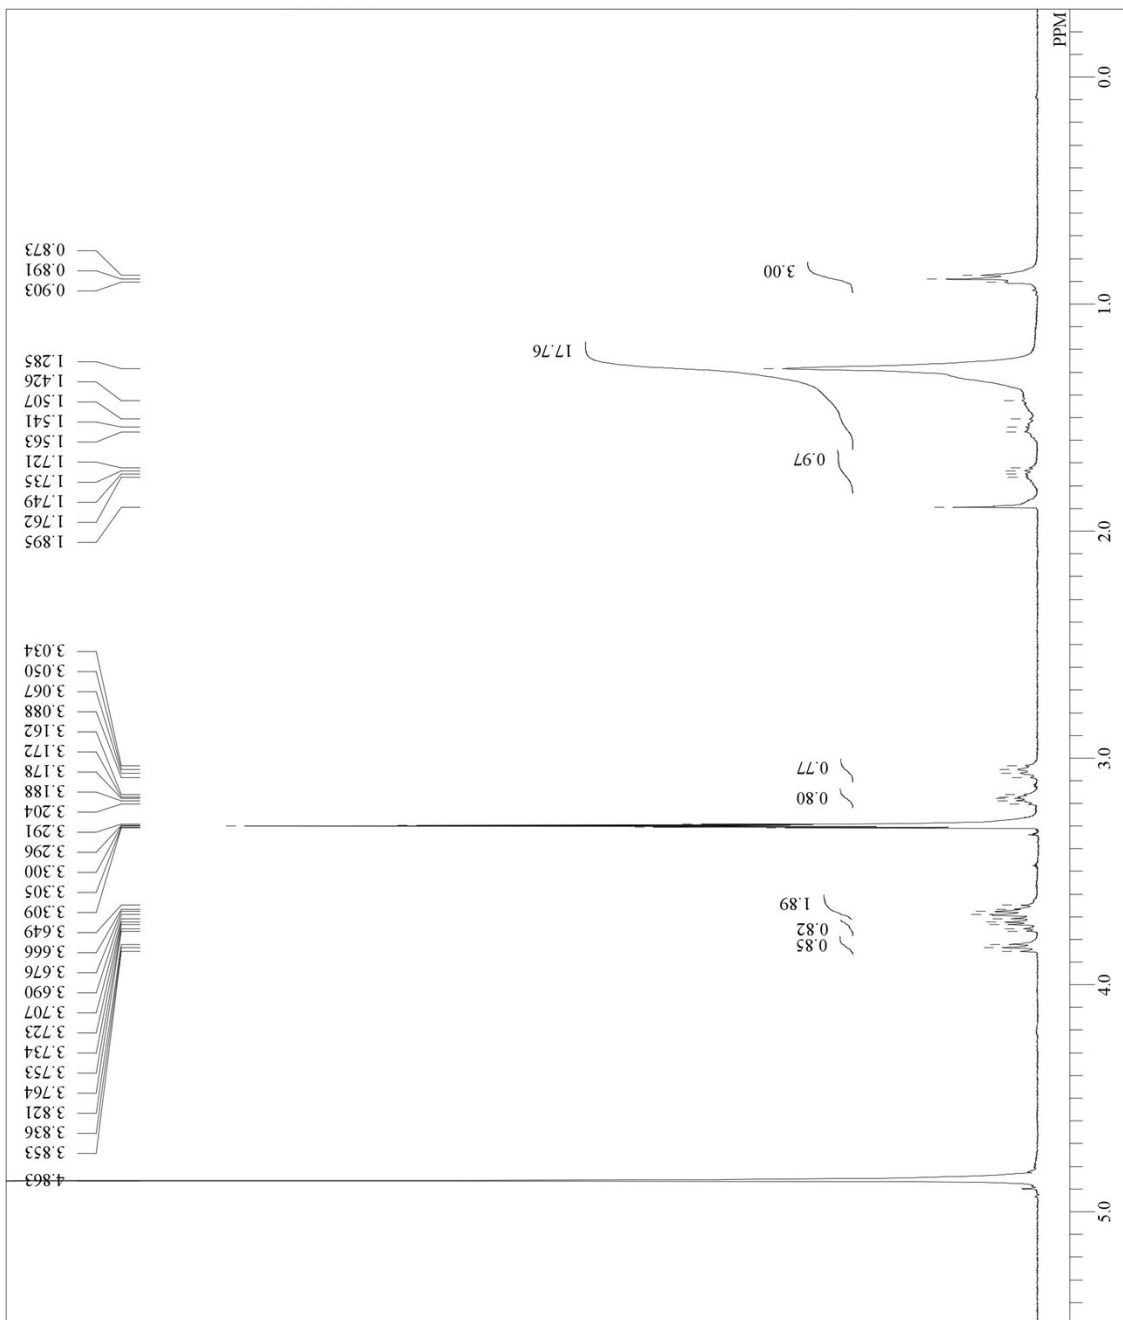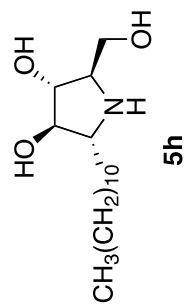

Supplement: c5ob02223a1.pdf [file c5ob02223a1.pdf]
